# Supplementary material for: Use of meat juice and blood serum with a miniaturised protein microarray assay to develop a multi-parameter IgG screening test with high sample throughput potential for slaughtering pigs
Source: BMC Vet Res. 2020 Apr 6;16:106. doi: 10.1186/s12917-020-02308-4 (PMC7137480; doi:10.1186/s12917-020-02308-4)
Supplement: Supplementary file 2 — Additional file 2. Measured microarray raw data from the ArrayTube and the ArrayStrip platform in laboratory A and measured microarray raw data on the ArrayStrip platform in laboratories B and C. [file 12917_2020_2308_MOESM2_ESM.xlsx]

## Sheet: AF2
laboratory	microarray platform	sample material	sample no.	sample declaration	A.pleuropneumoniae_1_10	A.pleuropneumoniae_1_10_1	A.pleuropneumoniae_1_10_2	A.pleuropneumoniae_1_20	A.pleuropneumoniae_1_20_1	A.pleuropneumoniae_1_20_2	A.pleuropneumoniae_1_20_3	A.pleuropneumoniae_1_5	A.pleuropneumoniae_1_5_1	A.pleuropneumoniae_1_5_2	A.pleuropneumoniae_1_5_3	Hepatitis-E-virus_0.25	Hepatitis-E-virus_0.25_1	Hepatitis-E-virus_0.25_2	Hepatitis-E-virus_0.25_3	Hepatitis-E-virus_0.5	Hepatitis-E-virus_0.5_1	Hepatitis-E-virus_0.5_2	Hepatitis-E-virus_0.5_3	Hepatitis-E-virus_0.75	Hepatitis-E-virus_0.75_1	Hepatitis-E-virus_0.75_2	Hepatitis-E-virus_0.75_3	Influenza-A-virus_0.05	Influenza-A-virus_0.05_1	Influenza-A-virus_0.05_2	Influenza-A-virus_0.05_3	Influenza-A-virus_0.1	Influenza-A-virus_0.1_1	Influenza-A-virus_0.1_2	Influenza-A-virus_0.1_3	Influenza-A-virus_0.2	Influenza-A-virus_0.2_1	Influenza-A-virus_0.2_2	Influenza-A-virus_0.2_3	M.avium_0.05	M.avium_0.05_1	M.avium_0.05_2	M.avium_0.05_3	M.avium_0.1	M.avium_0.1_1	M.avium_0.1_2	M.avium_0.1_3	M.avium_0.23	M.avium_0.23_1
A	ArrayTube	meat juice	1	ELISA pretested	0.019478	0.010873	0.007043	0.012148	0.017579	0.025133	0.012732	0.064489	0.083468	0.092901	0.11424	0.004684	0.012247	0.006844	0.007006	0.002908	0.005376	0.002998	0.002826	0.000964	0.01329	0.00388	0.002336	0.054102	0.010103	0.003082	-0.006114	0.007373	0.001916	0.001956	0.01464	0.000362	-0.002293	0.004747	0.005433	0.008803	0.0063	0.005386	0.003105	0.006078	0.004814	-0.005294	0.005876	0.011016	0.004705
A	ArrayTube	meat juice	2	ELISA pretested	0.025588	0.043614	0.02426	0.051299	0.032087	0.035765	0.052988	0.264571	0.212595	0.224807	0.246007	0.010911	0.006606	0.004925	0.005634	0.005349	0.006037	0.006635	0.025743	0.008883	0.00481	0.005718	0.004723	0.006471	INVALID	0.005262	0.001418	-0.000565	0.002159	0.003594	0.005506	0.011233	0.012385	0.006228	0.000311	0.077469	0.004208	0.006963	0.015258	0.03811	0.006556	0.006603	0.008189	0.010361	0.008495
A	ArrayTube	meat juice	3	ELISA pretested	0.025284	0.035137	0.05511	0.071384	0.06625	0.019663	0.046588	0.259733	0.210318	0.222967	0.260439	0.003589	0.003786	-0.000232	0.003228	INVALID	0.004871	0.004662	-0.000262	0.012578	0.006851	0.001803	0.002108	-0.002121	0.034181	0.001984	0.003672	0.019428	0.006744	0.008305	0.000988	0.003611	0.008057	0.011343	0.003857	0.008741	0.00623	0.002892	0.004456	0.003007	0.005663	0.000652	0.006335	0.010679	0.00945
A	ArrayTube	meat juice	4	ELISA pretested	0.008553	0.014454	0.012759	0.012013	0.012211	0.012213	0.043548	0.1539	0.170436	0.12822	0.178653	0.004389	0.002249	0.003726	0.006567	0.000237	0.001963	0.035151	0.031836	0.000769	0.004339	0.001181	0.004901	0.009699	0.00309	0.001883	0.018903	0.020052	0.087244	0.007121	0.004159	0.020654	-0.000218	0.028621	0.026976	0.004758	0.002925	0.003685	8.9e-05	0.014182	0.004864	INVALID	0.063073	0.006984	0.005604
A	ArrayTube	meat juice	5	ELISA pretested	0.018839	0.019013	0.012776	0.024067	0.032986	0.015607	0.011905	0.159875	0.167984	0.169193	0.143681	0.007346	0.00389	0.0036	0.001929	0.001204	0.002493	0.003794	0.004235	0.008084	0.003927	0.001492	0.001709	0.005899	0.011179	0.006394	0.023721	0.004663	0.000391	0.0025	0.000335	0.023832	0.008324	-0.00077	0.002991	0.00014	0.004058	0.003857	0.002488	0.001249	0.002797	0.003419	0.004382	0.004285	0.003574
A	ArrayTube	meat juice	6	ELISA pretested	0.027817	0.011719	0.011031	0.037367	0.00738	0.022182	0.015884	0.151126	0.150201	0.132917	0.038708	0.00682	0.00182	0.0018	0.002074	0.002042	0.002467	0.002251	0.003629	-0.001374	0.00435	0.043903	0.004568	0.002964	-0.000344	0.006669	0.001941	0.028219	0.004851	0.006131	0.002848	0.040389	0.001304	0.005109	0.005156	-0.002837	0.003546	0.020215	0.004243	0.002878	0.001573	0.001209	0.004293	-0.000363	0.00483
A	ArrayTube	meat juice	7	ELISA pretested	0.016701	0.060701	0.025582	0.057373	0.097469	0.052539	0.057968	0.176648	0.182926	0.11413	0.202006	0.014946	0.052801	0.002088	0.003531	0.005658	-0.000244	0.004528	0.006069	0.005143	0.003306	0.002487	0.003657	0.005085	0.002932	0.006395	0.001788	0.004826	0.006473	0.001742	0.005984	0.006618	0.001333	0.003009	0.006028	0.003924	0.005277	0.003391	0.015437	0.006044	0.006264	0.001826	0.005504	0.008122	0.003168
A	ArrayTube	meat juice	8	ELISA pretested	0.052104	0.037709	0.024292	0.031349	0.035451	0.028063	0.019648	0.163573	0.150701	0.136471	0.15779	0.00543	0.000241	0.026664	0.005149	0.009008	0.007188	0.006822	0.005765	0.002766	0.004818	0.013465	0.005605	0.011803	0.015335	0.005618	0.017189	0.031404	0.064905	0.01157	0.006708	0.01219	0.062601	0.010333	0.016514	0.026431	0.010696	0.004969	0.002296	0.004919	0.005495	-2.1e-05	0.006548	0.005036	0.012114
A	ArrayTube	meat juice	9	ELISA pretested	0.00855	0.004025	0.005737	0.013146	0.012232	0.057428	0.010485	0.080517	0.048803	0.091201	0.059094	0.001993	-3.5e-05	0.003044	0.004665	-0.005984	-0.000941	0.000384	0.00874	0.00816	0.001391	0.003381	0.022949	0.005771	0.003817	0.001685	0.002774	0.015463	0.000915	0.002696	0.003097	0.013496	0.007407	0.003314	0.006429	0.00692	0.000976	0.005779	0.001395	0.025182	0.004236	0.006989	0.003694	0.010792	0.001559
A	ArrayTube	meat juice	10	ELISA pretested	0.005516	0.048172	0.020407	0.009525	0.008427	0.010616	0.025151	0.074689	0.052015	0.066559	0.096939	0.000776	0.004204	0.002623	INVALID	0.005123	0.002108	0.005058	-0.000995	0.00984	0.002838	0.003367	0.012047	0.000868	INVALID	0.001222	0.098026	0.003347	0.003256	0.022976	-1e-06	-0.000109	0.004491	0.039428	0.045712	0.003444	0.008269	0.005031	0.007903	0.009146	0.002894	0.001168	0.002951	0.005743	0.006441
A	ArrayTube	meat juice	11	ELISA pretested	0.008593	5.5e-05	0.017652	0.019308	0.021236	0.022975	0.014797	0.132409	0.173557	0.085684	0.131724	0.010459	0.006089	0.003442	0.002623	0.004745	0.005574	0.008569	0.019096	0.007738	0.013888	0.005787	0.000946	0.007763	0.001855	0.004169	0.00232	0.042878	0.026363	0.001615	0.006214	0.046332	0.019089	0.002702	0.003546	0.001986	0.003393	0.003683	0.02239	0.003973	0.003521	0.002674	0.002796	0.003417	0.00891
A	ArrayTube	meat juice	12	ELISA pretested	0.024893	0.012487	0.016659	0.015049	0.012946	0.015137	0.005173	0.083998	0.118423	0.071254	0.098212	0.002898	0.009386	0.002904	0.001099	0.002638	0.002152	0.023314	0.002554	0.005572	0.014573	0.004234	0.010908	0.002967	INVALID	-0.001347	-0.000542	0.001769	0.00446	0.006488	-0.00218	0.00195	0.002278	0.0028	0.00558	0.002595	0.014129	0.036565	0.004957	0.003376	0.007607	0.003381	0.00617	0.001633	0.02512
A	ArrayTube	meat juice	13	ELISA pretested	0.034594	0.010566	0.021572	0.062074	0.031746	0.015822	0.038645	0.135882	0.108488	0.104673	0.131897	0.009907	-0.011077	-0.002471	0.017856	0.012699	0.058439	INVALID	0.002129	0.01233	0.015601	0.009036	0.006013	0.012716	INVALID	0.006957	0.00741	0.063105	0.003331	0.005732	0.018886	0.002106	0.010073	0.003408	0.025465	0.004273	0.006559	0.007479	0.006697	0.01114	-0.001515	0.004511	0.006087	0.015624	0.006464
A	ArrayTube	meat juice	14	ELISA pretested	0.091824	0.076088	0.091285	0.058906	0.063858	0.064176	0.044371	0.216132	0.196686	0.162868	0.252574	0.048347	INVALID	0.027084	0.01136	0.043048	0.017719	0.021069	0.017271	0.020533	0.028489	0.022027	0.029639	0.028289	0.028538	0.027849	0.016986	0.016873	0.024131	0.021709	0.016733	0.028435	0.018931	0.015908	0.011851	0.043644	0.022629	0.013206	0.025286	0.039216	0.026531	0.01881	0.025583	0.060257	0.030117
A	ArrayTube	meat juice	15	ELISA pretested	0.035676	0.032645	0.032568	0.033044	0.014573	0.03375	0.027893	0.200657	0.241671	0.188495	0.189996	0.009597	0.014695	0.003661	0.007636	0.021933	0.00468	0.007779	0.010884	0.003623	0.005827	0.004251	0.00275	0.017225	-0.011425	0.007463	0.027485	0.012167	-0.000292	0.004375	-0.013278	0.005741	0.002629	0.009748	-0.005482	0.013064	0.009513	0.026349	0.003581	0.011953	0.005626	0.021857	0.004456	0.006021	0.002699
A	ArrayTube	meat juice	16	ELISA pretested	0.145258	0.097612	0.119402	0.195393	0.182613	0.14767	0.152639	0.16518	0.183087	0.193692	0.160591	0.259618	0.202518	0.210587	0.227183	0.261972	0.21939	0.198991	0.224571	0.194583	0.169565	0.188563	0.192702	0.027805	0.263007	0.219283	0.179339	0.057133	0.231927	0.211423	0.157992	0.273225	0.265973	0.233842	0.232942	0.263489	0.223243	0.201998	0.258189	0.245027	0.186963	0.173903	0.217466	0.230699	0.209232
A	ArrayTube	meat juice	17	ELISA pretested	0.046512	0.017391	0.036591	0.03245	0.050204	0.127042	0.034739	0.201514	0.199684	0.211114	0.209418	0.007547	0.01362	0.008048	INVALID	0.008818	0.017191	0.014199	-0.003389	0.005962	0.006912	0.010614	0.010399	0.013293	INVALID	0.015449	0.012496	0.039534	0.014123	0.015624	0.01488	0.009524	0.009514	0.008944	0.00987	0.014794	0.015093	0.01304	0.014531	0.015983	0.01128	0.03397	0.032443	0.025467	0.018106
A	ArrayTube	meat juice	18	ELISA pretested	0.018803	0.05271	0.042925	0.071748	0.063157	0.034974	0.069311	0.167254	0.277892	0.262246	0.270268	0.061111	0.033728	0.00873	0.039274	0.01322	0.013393	0.020369	0.005737	0.025453	0.026971	0.03112	0.02269	INVALID	0.042902	0.01443	0.026306	0.023524	0.007076	0.017323	0.009639	0.030213	0.006633	0.011126	0.001776	-0.003893	-0.014494	0.011262	0.01541	INVALID	0.040675	0.013648	0.032308	INVALID	0.044518
A	ArrayTube	meat juice	19	ELISA pretested	0.005761	0.008769	0.008706	0.03087	0.015497	0.012406	0.012582	0.126008	0.083871	0.066458	0.126749	0.00611	0.004046	0.0007	0.004618	0.001622	0.003493	0.001263	0.000419	0.04134	0.045373	0.00047	0.003592	0.005353	0.008767	0.002259	0.003829	0.00091	0.001224	0.007791	0.010099	0.004028	0.006449	0.003142	-0.001789	0.002574	-0.001966	0.001289	-0.002902	0.002949	0.020722	0.004447	0.007878	0.004755	0.009102
A	ArrayTube	meat juice	20	ELISA pretested	0.135995	0.064628	0.079738	0.019245	0.076894	INVALID	0.025217	0.293413	0.225933	0.28924	0.281778	0.001659	0.001314	INVALID	0.00463	-0.001103	0.003132	INVALID	0.001248	0.004638	0.002728	0.019542	0.00129	0.011398	INVALID	0.001275	0.007999	0.015509	0.026646	0.006941	0.006508	0.005776	0.009948	0.032375	INVALID	0.005393	0.007546	0.0214	0.001898	0.003274	0.001359	0.072147	0.003698	0.003698	0.015669
A	ArrayTube	meat juice	21	ELISA pretested	0.017922	0.072275	0.034571	0.040744	0.051406	0.022974	0.040018	0.163768	0.147089	0.196472	0.169456	INVALID	0.003357	0.004355	-0.00046	0.013674	0.015739	0.014265	0.00396	0.022296	0.002613	0.004096	0.003286	0.004386	INVALID	0.002016	-0.004724	0.00293	0.004376	-0.00091	0.004787	0.002561	0.002189	0.006225	0.001466	0.010151	0.00221	0.003817	0.002532	0.003456	0.00831	0.004939	0.007389	0.005191	0.004197
A	ArrayTube	meat juice	22	ELISA pretested	0.078857	0.077999	0.079163	0.033442	0.067745	0.037787	0.128755	0.233193	0.234179	0.207958	0.209985	0.002106	0.002804	0.005472	0.00346	0.005397	0.002506	0.008521	0.00571	0.008115	0.004539	0.009694	0.009357	0.009494	INVALID	0.009904	0.007438	0.013389	0.001723	0.018016	0.003346	0.000183	0.000605	0.001086	0.003932	0.001458	0.017952	0.002204	-0.002493	0.004352	-0.00025	0.003428	INVALID	0.004167	0.005186
A	ArrayTube	meat juice	23	ELISA pretested	0.040693	0.016236	0.064544	0.059515	0.156822	0.069012	0.080997	0.225075	0.171967	0.356429	0.30634	0.007171	0.003363	0.00888	0.006738	0.000978	0.00737	0.012118	0.0022	0.00248	0.003253	0.008833	0.012276	INVALID	0.023562	-0.001029	-0.006721	0.006028	0.007009	0.005186	0.004769	0.048443	0.019319	0.002311	0.044902	0.006867	0.005003	0.00555	0.000133	0.004867	0.009401	0.007926	0.007209	0.009692	0.005574
A	ArrayTube	meat juice	24	ELISA pretested	0.014569	0.007701	0.008954	0.003502	0.009118	0.025648	0.017011	0.048237	0.098283	0.090249	0.06648	INVALID	0.002296	0.055521	0.004618	0.005783	0.007557	0.017866	0.001588	0.00347	0.004823	-0.001157	0.008569	0.002067	0.001868	0.001912	0.007523	0.012979	0.006043	0.005379	0.004628	0.011971	0.007319	0.006976	0.005345	0.005835	-0.002681	0.008801	0.003101	0.006581	INVALID	0.022117	-4.3e-05	-0.001077	0.007584
A	ArrayTube	meat juice	25	ELISA pretested	0.013823	0.035953	0.048383	0.023759	0.035569	0.030483	INVALID	0.2521	0.239699	0.286519	0.239836	0.004392	0.010009	0.009741	0.00872	0.005827	0.009661	0.022326	0.003724	0.008148	0.016032	0.007414	0.003365	0.001595	0.007389	-0.001445	-0.003902	0.009861	0.005404	0.007023	0.011235	0.003935	0.00885	0.006066	0.007354	0.078223	0.006073	0.040314	0.007243	0.002372	0.006639	0.006408	0.021033	0.00955	0.00737
A	ArrayTube	meat juice	26	ELISA pretested	0.017766	0.012792	0.009928	0.087311	0.056279	0.02766	0.045706	0.147763	0.27226	INVALID	0.128142	0.012936	INVALID	0.004257	0.005147	0.00304	0.030329	0.006389	0.004258	0.003243	0.01223	0.001539	0.00609	0.004478	0.019629	0.00282	0.00276	0.05852	0.003423	0.001697	0.004337	0.056336	0.009715	0.005962	0.001516	0.001045	0.005171	0.005902	0.006902	-0.004657	-0.001735	0.005339	0.009774	0.097082	-0.000808
A	ArrayTube	meat juice	27	ELISA pretested	0.073644	0.031133	0.099223	0.049969	0.052426	0.105013	0.143158	0.26005	0.313662	0.273613	0.212793	0.006661	0.014654	0.008616	0.032996	0.012213	0.008227	0.024142	0.011398	0.01603	0.014921	0.008031	0.005569	0.001663	0.006704	0.007453	0.01131	0.105316	0.016714	0.016986	0.005177	0.098476	0.019709	0.023803	0.018274	0.006664	0.008658	0.01155	0.013347	0.015193	0.014127	0.033804	0.010952	0.03404	0.053998
A	ArrayTube	meat juice	28	ELISA pretested	INVALID	0.037396	0.042534	0.087448	0.04208	0.05606	0.018563	0.280364	0.301354	0.320141	INVALID	0.003866	0.007124	0.052297	0.009867	0.003942	0.008231	0.003762	0.017305	0.004891	0.007344	0.00816	0.001656	0.019358	0.005834	0.009931	0.006624	INVALID	0.004736	0.001593	0.007912	INVALID	0.006983	0.01126	0.001331	0.009291	0.001619	0.011373	0.002398	0.006005	0.00497	0.00398	0.014494	0.012412	0.015452
A	ArrayTube	meat juice	29	ELISA pretested	0.058898	0.019611	INVALID	0.022941	0.007547	0.006745	0.008247	0.068781	0.056365	0.065099	0.05797	0.002873	0.009198	0.002594	0.002953	0.007311	0.008559	0.00508	0.015252	0.00048	0.004851	0.005584	-0.00023	0.027491	INVALID	0.008307	-0.006511	0.005695	0.007631	0.003505	0.002311	0.002748	0.005151	0.010106	0.004515	0.001628	0.008176	0.009003	0.003423	0.005401	0.006583	0.006503	0.005363	0.007678	0.005124
A	ArrayTube	meat juice	30	ELISA pretested	0.056365	0.087517	0.110481	0.07202	0.054463	0.057794	0.058051	0.322103	0.350869	0.400928	0.389929	0.001196	0.084493	0.027998	0.015124	0.02488	0.007618	0.026226	0.005792	0.013142	0.034504	0.020801	0.078801	0.006105	0.018464	0.008356	0.006229	0.008871	0.023412	0.007545	INVALID	3.6e-05	0.006581	0.009704	0.003074	0.017427	0.006206	0.005802	0.00121	0.010569	-0.002017	0.017135	0.028705	0.12032	0.011933
A	ArrayTube	meat juice	31	ELISA pretested	0.107656	0.067396	0.073399	0.112916	INVALID	0.214592	INVALID	0.277493	0.31724	0.303663	0.321158	0.027495	0.025012	0.01482	0.014403	0.019202	0.022733	0.070341	0.019345	0.020692	0.019266	0.01562	0.026239	0.033188	0.003797	0.147056	0.124284	0.025783	0.004659	0.007695	0.009889	0.016987	0.011869	0.022505	0.020938	0.058907	0.036464	0.031398	0.02815	0.037358	0.027541	0.033877	0.035541	0.058369	0.047127
A	ArrayTube	meat juice	32	ELISA pretested	0.145115	0.13056	0.165417	0.173834	0.165648	0.183768	0.1952	0.39131	0.32355	0.37994	0.235939	0.184015	0.142792	0.134209	0.135199	0.15923	0.13698	0.12463	0.128753	0.136159	0.109534	0.126678	0.118614	0.156182	0.176839	0.142893	0.13798	0.100597	0.111068	0.077516	0.086681	0.12381	0.107717	0.103483	0.105445	0.163436	0.136494	0.127323	0.154304	0.181561	0.126694	0.144682	0.140466	0.082939	0.154085
A	ArrayTube	meat juice	33	ELISA pretested	0.09423	0.080835	0.081731	0.106615	0.112656	0.060814	0.177744	0.356369	0.274028	0.264502	0.303693	-0.000848	0.004405	0.007075	0.014546	-0.003009	0.009963	-0.000515	0.003664	0.033098	0.002482	0.015501	0.017407	0.008321	0.007342	0.015252	0.007032	0.018571	0.005387	0.017906	0.009667	0.116679	0.000163	0.002879	INVALID	0.011024	0.00553	0.006062	-0.000453	0.006704	0.030841	0.038448	0.009704	0.005583	0.00704
A	ArrayTube	meat juice	34	ELISA pretested	0.07541	0.096478	0.085089	0.029553	INVALID	0.056856	0.040341	0.314371	0.32101	0.228994	0.272369	0.01039	0.009559	0.004463	0.008533	0.00566	0.00749	0.002837	-0.002554	0.034526	0.003905	0.005901	0.007184	0.015167	0.015788	0.015027	-0.003394	0.005205	0.004627	0.009026	0.001766	0.061621	0.013588	-0.001947	0.004469	0.007525	0.005519	0.007246	0.016533	0.000504	0.006968	0.041331	0.009436	0.01727	0.006159
A	ArrayTube	meat juice	35	ELISA pretested	0.185997	0.160948	0.127195	0.084157	0.057569	0.067728	0.12118	0.336358	0.328002	0.348367	0.273647	0.008426	0.04152	0.037961	0.04067	0.025161	0.015876	0.023956	0.02919	0.015222	0.025791	0.03206	0.011492	0.08274	0.098673	0.048789	0.026969	0.077466	0.023692	0.028632	0.017396	0.02659	0.053403	0.042426	INVALID	0.059355	0.045779	0.060288	0.059163	0.054194	0.041228	0.04456	0.087695	0.151221	0.072717
A	ArrayTube	meat juice	36	ELISA pretested	0.113104	0.114975	0.10063	0.072271	0.052491	0.112658	0.04727	0.264748	0.255182	0.320526	0.347888	0.052077	0.006984	0.007676	0.003542	0.002714	INVALID	0.001615	0.002389	0.000392	0.00101	-0.001787	0.052483	0.006316	INVALID	0.010418	0.016058	0.000657	0.00384	0.028027	-0.000465	0.015391	0.009693	0.009162	0.009073	0.015023	0.008299	0.01754	0.022133	0.013567	0.010084	0.004922	0.009579	0.025734	0.019522
A	ArrayTube	meat juice	37	ELISA pretested	0.0323	0.076086	0.03988	0.109582	0.103351	0.073154	0.090677	0.10525	0.133058	0.093595	0.102601	0.056137	0.033309	0.031708	0.049749	0.090541	0.047162	0.069441	0.069467	0.000565	0.046608	0.072404	0.077253	0.070341	0.095685	0.073913	0.106228	0.023003	0.003733	0.01995	0.02317	0.034046	0.030694	INVALID	0.030747	INVALID	0.071062	0.054346	0.05377	0.01595	0.021623	0.03392	-0.002424	0.090572	0.041013
A	ArrayTube	meat juice	38	ELISA pretested	0.012275	0.015776	0.007874	0.00316	0.015583	0.014259	0.049911	0.058819	0.084943	0.111003	0.109319	0.007808	0.004189	0.016165	0.00751	0.011151	0.0121	0.008536	-0.006639	0.011603	0.090344	0.083106	0.002896	0.001521	0.010076	0.024121	0.046078	0.005011	0.008095	INVALID	0.004258	0.002275	0.007693	0.001032	0.004046	0.009176	0.005213	0.011859	0.00177	0.003597	0.003199	0.003993	0.002957	0.001762	INVALID
A	ArrayTube	meat juice	39	ELISA pretested	0.011773	0.016274	0.0281	0.008839	0.013584	0.035102	0.024523	0.102827	0.074254	0.072511	0.098602	0.005611	0.005822	0.003561	-0.003212	0.003662	0.003794	0.014275	0.085816	0.004576	0.004648	0.004669	0.004322	0.005633	0.007951	0.005985	0.018477	0.003193	0.005029	-0.004528	-0.00557	0.072749	0.006418	0.039299	0.003667	0.034958	-0.000968	0.000821	INVALID	0.004118	0.00293	0.003305	0.00067	0.023541	0.002138
A	ArrayTube	meat juice	40	ELISA pretested	0.014191	0.022746	0.110891	0.002313	0.002419	-0.000265	0.008567	0.051063	0.046051	0.038408	0.054206	0.006024	-0.001623	0.001538	0.004971	0.016582	-0.002516	0.001519	0.002929	0.003036	0.005672	0.009734	-0.000247	0.003598	INVALID	0.001842	0.001294	-0.000555	-4.8e-05	-0.000524	0.001801	0.002937	0.005642	0.001447	0.000934	0.004583	0.020687	0.000977	0.001803	0.026851	0.003718	0.005046	0.001605	0.005322	0.003318
A	ArrayTube	meat juice	41	ELISA pretested	0.041506	0.027472	0.079617	0.01038	0.033212	0.02358	0.05704	0.160912	0.155238	0.206171	0.176911	0.010795	0.005134	0.006747	0.004414	0.00982	0.005171	0.009185	0.01646	0.010142	0.001688	-0.000978	0.000141	0.030363	0.04477	INVALID	0.007602	0.006912	INVALID	0.000521	0.002871	0.00725	0.00523	0.004794	0.004915	0.008706	0.008307	0.007488	0.010263	-0.000629	0.008473	0.010078	0.008789	0.002685	0.029376
A	ArrayTube	meat juice	42	ELISA pretested	0.086399	0.078204	0.087263	0.119325	0.082028	0.118852	0.118852	0.212658	0.217992	0.159187	0.252836	0.093426	0.076988	0.059846	0.069871	0.078394	0.081499	0.069733	0.067909	0.070945	0.05908	0.048667	0.065938	0.125716	0.096627	0.093961	0.073459	0.060762	0.081004	0.065429	0.047584	0.045928	0.087172	0.07226	0.125829	0.117185	0.10215	0.089038	0.140332	0.097495	0.078406	0.05398	0.069655	0.077449	0.07279
A	ArrayTube	meat juice	43	ELISA pretested	INVALID	0.035157	0.03276	INVALID	0.020566	0.018723	0.020147	0.178893	0.206006	0.204053	0.136247	0.01851	0.002662	0.00456	0.005278	0.015321	0.001886	0.004582	0.006321	0.010403	0.002446	0.002269	0.001564	0.00278	INVALID	0.001367	0.001749	0.000794	0.007351	-0.002713	0.083515	0.00525	0.000766	INVALID	0.004627	0.003339	0.008806	0.002487	0.002175	0.006957	0.002508	0.002492	0.003971	0.001128	0.002613
A	ArrayTube	meat juice	44	ELISA pretested	0.048522	0.019695	0.010034	0.050939	0.04291	0.054446	0.041238	0.213964	INVALID	0.199363	0.185305	0.010702	INVALID	0.005783	0.006656	0.007766	0.005756	0.002194	INVALID	INVALID	0.005096	0.020046	-0.001217	0.128282	0.01155	0.034829	0.00488	0.00066	0.007502	0.003291	0.002933	0.001616	0.060544	0.003831	0.011141	0.079178	0.005391	0.0082	INVALID	0.016503	0.032439	0.008377	0.002359	0.002309	0.010862
A	ArrayTube	meat juice	45	ELISA pretested	0.026812	0.019832	0.002129	0.015733	0.008555	0.0113	0.046719	0.190346	0.173716	0.157127	0.122323	0.027526	0.014766	INVALID	0.003917	INVALID	INVALID	0.011557	0.001067	0.003903	0.065879	0.004443	0.001532	0.071385	0.020432	0.00374	0.009052	0.015018	0.005305	0.006001	0.0009	0.007664	INVALID	0.01065	0.004139	INVALID	0.005486	0.002059	0.0018	0.046328	0.001051	0.005153	0.011359	0.025434	0.016666
A	ArrayTube	meat juice	46	ELISA pretested	0.015651	0.040461	0.069113	0.104563	0.130058	0.061305	0.052781	0.275428	0.175318	0.215798	0.239088	0.005752	0.002479	0.004558	0.052865	-0.002782	-0.00069	0.016855	5e-05	0.014237	0.004251	0.026594	0.00894	-0.000508	0.002693	0.003016	0.009987	0.018994	0.008306	0.023549	0.011582	0.090335	0.005085	0.006701	0.002844	0.004397	0.023831	0.004923	0.046963	0.002699	0.001677	0.027233	0.006941	0.004978	0.005986
A	ArrayTube	meat juice	47	ELISA pretested	0.081552	0.042195	0.005715	0.109687	0.029996	0.066398	0.044156	INVALID	INVALID	INVALID	INVALID	0.020233	0.007585	0.016987	0.011621	0.011914	0.007597	0.01136	0.022414	0.029519	0.00421	0.028313	0.014322	0.008918	0.006193	0.012746	0.021333	INVALID	0.005177	0.013582	0.011616	0.011045	0.012475	0.097831	0.022501	0.005191	0.012623	0.007983	0.008313	0.021157	0.012068	0.025198	0.023415	0.01597	0.020361
A	ArrayTube	meat juice	48	ELISA pretested	0.073486	0.021467	0.132908	0.109029	INVALID	0.076824	0.018292	0.386594	0.309303	0.294383	0.249581	0.007566	0.010014	0.000757	0.001372	0.019963	0.029084	0.007657	0.00593	0.01244	0.001282	0.008006	0.009482	0.004394	0.00443	0.009883	0.068103	0.021263	INVALID	-0.000145	0.047522	0.085358	0.007765	0.011521	0.020755	0.004426	0.010929	-0.005327	0.005677	-6e-06	0.021384	0.008609	0.007897	0.016159	0.008058
A	ArrayTube	meat juice	49	ELISA pretested	0.02826	0.05353	0.038355	-0.0056	0.053819	0.008148	0.000689	0.120074	0.104709	0.175526	0.154155	0.006987	0.04683	0.003835	0.005283	0.009586	0.007814	0.013149	0.000851	0.000779	0.013203	0.004289	0.003256	0.003007	INVALID	0.005716	0.008638	0.013468	0.020363	0.00439	0.01072	5.5e-05	0.004652	-0.001295	0.011829	0.001041	0.000996	0.001492	0.003662	0.012594	0.003155	0.002188	0.029228	0.00141	0.000239
A	ArrayTube	meat juice	50	ELISA pretested	0.103861	0.088544	0.084435	0.098858	0.060246	INVALID	0.059979	0.364923	0.295869	0.342102	0.322916	0.029237	0.030912	0.020691	0.0173	INVALID	0.021199	0.012586	0.016015	0.004257	0.019374	0.014666	0.015976	0.016015	0.011228	0.01496	0.018856	0.033073	0.009841	0.096813	0.010674	0.010428	0.029624	0.010128	0.054556	0.011962	0.023467	0.014902	0.018166	0.017362	0.014348	0.018788	0.038531	0.018113	0.013155
A	ArrayTube	meat juice	51	ELISA pretested	0.09037	0.067995	0.079912	0.215263	0.057174	INVALID	INVALID	0.331532	0.276047	0.26817	0.316376	0.024999	0.029329	0.014052	0.004955	0.029054	0.027305	0.015684	0.007178	0.017311	0.02099	0.010431	0.018595	0.021314	0.009914	0.043832	0.008469	0.037256	0.015708	0.006469	0.001668	0.039992	0.020151	0.012671	0.003733	0.030024	0.020645	INVALID	0.02048	0.026306	0.017215	0.018671	0.005112	0.009198	0.011556
A	ArrayTube	meat juice	52	ELISA pretested	0.125296	0.056164	0.053475	0.079573	0.030554	0.079112	0.067027	0.326476	0.24822	0.315114	0.225152	0.032046	0.003908	0.015294	0.040557	0.015632	INVALID	0.03634	0.039532	0.018973	0.016397	0.002593	0.037472	INVALID	0.003212	0.011916	0.003948	0.142536	INVALID	0.010446	0.023665	0.014578	0.005097	0.006932	0.014342	0.009145	INVALID	0.011278	0.011029	0.021899	0.036898	0.009346	0.014029	0.0177	0.005857
A	ArrayTube	meat juice	53	ELISA pretested	0.045709	0.037385	0.039339	0.027263	0.007067	0.027147	0.009829	0.296645	0.248818	0.26894	0.343804	0.010586	0.005828	0.003954	0.024881	0.004732	INVALID	0.00886	0.011989	-0.001939	INVALID	-0.003534	0.003532	0.11008	0.027959	0.008194	0.02463	0.074483	0.012892	0.009034	0.026881	0.00582	0.014454	-0.000422	0.073973	0.012822	0.011199	0.007359	0.007149	0.011538	0.007631	0.007585	0.007872	0.019995	0.006652
A	ArrayTube	meat juice	54	ELISA pretested	0.089771	0.045204	0.056027	0.006736	0.071448	0.014464	0.019345	0.344023	0.232967	0.21215	0.251794	0.021647	INVALID	0.045267	0.019732	0.021371	0.030397	0.022282	0.008706	0.039647	0.024326	0.011913	0.017617	0.000117	0.028039	0.052165	0.025604	0.037416	0.022986	0.032015	0.019689	0.102943	0.020361	0.075921	0.019095	0.115625	0.043844	0.024076	0.021703	0.023572	0.051589	0.019965	0.02897	0.010885	0.012639
A	ArrayTube	meat juice	55	ELISA pretested	0.024999	0.049172	0.024343	0.011443	0.014937	0.018271	0.01645	0.151781	0.125985	0.185421	0.226692	0.068109	0.003227	0.002209	0.002529	0.096082	0.007808	0.001564	0.01172	0.013086	0.001114	0.015114	-0.000564	0.001653	0.011164	0.001245	0.089323	0.099888	0.001344	0.007206	0.01149	0.089401	0.002931	INVALID	INVALID	0.000568	0.010743	0.003823	0.004184	-3.4e-05	0.005952	0.005825	0.006224	0.066725	-0.000155
A	ArrayTube	meat juice	56	ELISA pretested	0.125437	0.098526	0.086952	0.033847	0.023078	0.025336	0.022084	0.252871	0.246468	0.316741	0.23965	0.016252	0.040585	0.0078	0.010059	0.018506	-0.00835	INVALID	0.026485	0.021551	0.004142	0.005716	0.039773	0.007585	0.034509	0.065821	0.011736	INVALID	0.027927	0.078222	0.005806	0.067827	0.021688	0.030639	0.020605	0.050826	0.053628	0.051375	0.015758	0.011272	0.060937	0.040385	0.024681	0.079321	0.017386
A	ArrayTube	meat juice	57	ELISA pretested	0.09793	0.068022	0.137138	0.061761	0.096002	0.089794	0.034894	0.225564	0.212584	0.206877	0.260139	0.006563	0.014939	0.019809	0.035938	0.008388	0.006619	0.011882	0.053925	0.00366	0.013249	-0.001713	0.033777	INVALID	0.017236	0.013364	0.017907	0.04125	INVALID	0.012096	0.015983	0.012154	0.000173	0.01341	0.016968	0.007493	0.013424	0.010021	0.017393	0.017429	0.01523	0.007862	0.096317	0.018268	0.022521
A	ArrayTube	meat juice	58	ELISA pretested	0.021645	0.04442	0.043544	0.014692	-0.00673	0.026305	0.029506	0.152495	0.101696	0.113219	0.122319	INVALID	0.016376	0.011588	0.025329	0.022842	0.014307	0.011828	0.016025	0.021026	0.023481	0.017618	-0.001372	0.028238	INVALID	0.022115	0.052118	-0.003554	0.022158	0.02005	0.022722	-0.001368	0.02432	0.027788	0.09135	0.031903	0.029075	0.029289	0.040695	0.089038	0.01873	0.024968	0.031779	0.090123	0.020869
A	ArrayTube	meat juice	59	ELISA pretested	0.021655	0.016927	0.005981	0.019912	0.012224	0.014996	0.014456	0.106007	0.03259	0.139549	0.085221	0.006298	0.022661	0.004248	0.002515	0.004707	0.000454	0.001965	0.001626	0.009856	0.001898	0.004134	-0.002137	0.003319	0.018722	0.010123	0.005504	0.011597	0.002192	0.00149	0.005642	0.008838	0.005882	0.00181	0.004023	0.003592	0.000888	0.003309	0.044791	0.001086	INVALID	-0.002953	0.002587	0.004688	-0.004911
A	ArrayTube	meat juice	60	ELISA pretested	0.043111	0.037615	0.073346	0.037086	0.024173	0.02587	0.015807	INVALID	0.188152	0.18584	0.19432	0.003481	0.000206	0.006674	0.023695	0.066884	0.00226	INVALID	0.034124	0.010608	0.013485	0.004336	0.01768	0.011037	0.003017	0.024105	0.007836	0.00133	0.026787	0.024013	0.018511	0.031782	0.044255	0.041533	0.00376	INVALID	0.105585	0.015128	0.040978	0.172679	0.003539	0.02097	INVALID	INVALID	0.016334
A	ArrayTube	meat juice	61	ELISA pretested	0.008851	0.013803	0.060594	0.017004	0.014238	0.015415	0.018531	0.109158	0.127927	0.108998	0.119714	0.002723	0.044193	0.004913	0.020539	0.001208	0.002298	0.027332	0.054261	0.007148	-0.000529	0.083185	0.00611	0.010697	0.09588	-0.000229	0.004502	0.062149	0.006571	0.00959	0.017865	-0.002734	0.00965	0.007977	0.002616	0.010257	0.002623	0.054634	0.003052	0.002919	0.008221	0.010951	0.00342	0.002947	0.003729
A	ArrayTube	meat juice	62	ELISA pretested	0.115886	0.076131	0.10408	0.09217	0.033566	0.071243	0.038763	0.249991	0.324647	0.321299	0.263473	0.028453	0.045767	0.072538	INVALID	0.007621	0.017256	0.017856	0.040738	0.012218	0.016731	0.024601	0.038557	0.009195	0.016672	0.020632	0.040815	0.012094	0.004478	0.01776	0.033355	0.026193	0.008993	0.022095	0.051213	INVALID	0.039186	INVALID	0.174781	INVALID	0.021671	0.015595	INVALID	0.16582	0.023229
A	ArrayTube	meat juice	63	ELISA pretested	0.019499	0.018439	0.012862	0.012757	0.008105	-0.002687	0.014406	0.135237	0.134867	0.085618	0.104578	0.003243	0.003461	0.000364	0.00352	0.001469	0.001031	0.001674	0.002161	-0.000743	0.002118	0.001585	0.005276	0.003844	0.002708	0.043361	0.00382	-0.000555	0.000893	-0.000409	INVALID	0.000621	0.001056	0.003739	0.007503	INVALID	0.003831	0.009831	0.066361	0.000927	0.002983	0.016962	-0.003038	0.00444	0.003704
A	ArrayTube	meat juice	64	ELISA pretested	0.022372	0.042598	0.08688	0.059778	0.035381	0.038222	0.059882	0.351049	0.23991	0.280267	0.21535	0.000314	0.010063	0.013152	0.014062	0.013258	0.006016	INVALID	0.0153	0.003961	0.002273	0.007232	0.013677	0.007831	0.005205	0.009209	-0.003118	0.029989	0.010999	0.008449	0.024274	INVALID	0.006441	0.004552	0.023118	-0.006581	0.008255	-0.003319	0.00453	0.015379	0.068468	0.006697	0.024967	0.078024	-0.001566
A	ArrayTube	meat juice	65	ELISA pretested	0.025313	0.015412	0.012426	0.027099	0.018452	0.013464	0.013966	0.109969	0.099032	0.048021	0.085502	0.00541	0.00207	0.000337	0.002427	INVALID	0.001106	0.002215	0.003645	0.00153	0.044691	0.003599	0.001079	0.009858	0.002418	0.003121	0.006184	0.006696	-0.000511	0.000904	0.004657	0.004613	0.003154	0.002209	0.001637	0.000308	0.003517	-0.002464	-0.000347	0.000182	0.005038	INVALID	0.002874	0.004694	0.000935
A	ArrayTube	meat juice	66	ELISA pretested	0.070763	0.037472	0.048598	0.055135	0.037613	0.034532	0.054087	0.148141	0.202396	0.156619	0.274192	0.010679	0.005321	0.013094	0.002907	0.011816	0.005834	INVALID	0.011956	INVALID	0.010072	0.058315	0.0095	0.005879	0.00735	0.005895	0.01452	0.005601	8e-05	0.001489	0.026614	0.005519	0.002626	0.002395	0.012759	0.008412	0.003885	0.01392	0.008966	0.005518	0.009475	0.017329	0.003992	0.008033	0.007576
A	ArrayTube	meat juice	67	ELISA pretested	0.034254	0.052176	0.032326	0.040012	0.062511	0.037867	INVALID	0.284123	0.259805	0.334172	0.338918	0.025185	0.032402	0.018274	0.015298	0.009762	0.022114	INVALID	0.011538	-0.003259	0.029457	0.027645	0.012027	INVALID	0.022507	0.017052	0.003252	INVALID	0.024845	0.025259	0.00217	INVALID	0.015372	0.014913	0.027919	0.013462	0.044941	0.016859	0.040737	0.007703	0.033267	0.009042	0.037635	0.035804	0.031533
A	ArrayTube	meat juice	68	ELISA pretested	0.099595	0.098481	0.106102	0.062915	INVALID	0.084653	0.089949	0.440561	0.36678	0.333042	0.41962	0.075551	0.043248	0.085913	0.060178	0.058998	0.041855	INVALID	INVALID	0.127572	0.06655	0.060272	0.095049	0.063663	INVALID	0.057693	0.045308	INVALID	0.026089	0.04086	0.049633	INVALID	0.062442	0.029813	0.07735	0.038057	0.06916	INVALID	0.029562	0.056437	0.056026	0.074422	0.073519	0.057366	0.063503
A	ArrayTube	meat juice	69	ELISA pretested	0.046844	0.068425	0.029117	0.046932	0.092463	0.040033	0.045979	0.291472	0.333604	0.251998	0.231579	0.006003	0.01213	0.001142	0.005468	0.002199	0.005238	0.003119	0.019498	0.011986	0.001204	0.000776	0.001732	0.003873	0.011786	0.00948	0.001691	0.092952	0.007374	0.002639	0.00357	INVALID	0.009239	0.004001	0.004473	0.006015	0.003582	0.009384	0.011514	0.001913	0.007508	0.006833	0.010589	0.053898	0.011737
A	ArrayTube	meat juice	70	ELISA pretested	0.099217	0.131523	0.084853	INVALID	0.050339	0.109492	0.028126	0.40111	0.361903	0.413403	INVALID	0.014816	0.015501	0.003753	0.009655	0.022933	0.049419	0.016318	0.022147	INVALID	INVALID	0.006576	0.005271	0.007127	0.013953	0.005745	0.030292	0.014236	0.019103	0.005683	0.036558	0.013044	0.07255	0.036171	0.010637	0.014696	0.04127	0.013356	0.005172	0.00603	0.006241	-0.001608	0.010952	INVALID	0.004948
A	ArrayTube	meat juice	71	ELISA pretested	0.071306	0.027141	0.092225	0.065849	0.109743	0.020693	0.040529	0.319384	0.273612	0.269859	0.341728	0.008625	0.007435	0.040828	0.020364	0.007974	0.008362	0.020314	0.015674	INVALID	0.003528	0.003662	0.005555	INVALID	0.036738	0.0291	0.003051	0.016182	0.006939	0.009154	0.01016	0.00178	0.007022	0.030989	0.004433	-0.008907	0.008107	0.02259	INVALID	0.010285	0.024252	0.0107	0.004701	0.005604	0.012397
A	ArrayTube	meat juice	72	ELISA pretested	0.022652	0.012302	0.017505	0.012503	0.010243	0.060181	INVALID	0.228009	0.263264	0.248947	0.242019	0.001158	0.020854	0.003304	0.003687	0.002634	0.002528	0.016816	0.00719	0.017796	0.003184	0.007611	INVALID	0.00429	0.010027	0.010716	INVALID	0.144056	0.013967	0.010143	INVALID	0.008054	0.01022	0.021138	0.013051	0.003982	0.008458	0.0149	0.016036	0.022008	0.011909	0.032174	0.01349	0.014977	0.001715
A	ArrayTube	meat juice	73	ELISA pretested	0.028255	0.018425	0.015582	0.059363	0.053939	0.078419	0.016393	0.137671	0.171201	0.064176	0.088358	0.004253	-0.00044	0.003642	-0.002261	0.001106	0.011161	0.035321	0.008521	0.008261	0.002528	0.009239	0.007035	0.004802	0.011892	0.005508	0.003169	0.006192	0.008894	0.003117	0.001893	0.010573	0.003381	0.003381	0.009043	0.001267	0.001169	0.001412	0.002398	0.002578	0.001995	0.005545	0.007572	0.013244	0.00736
A	ArrayTube	meat juice	74	ELISA pretested	0.01294	0.007222	0.014469	0.019686	0.013012	0.007648	0.047388	0.093052	0.130217	0.074109	0.089521	0.002411	0.000827	0.001482	-0.000657	0.001867	0.121901	0.093849	0.048314	0.001669	-0.004766	0.002765	0.006625	0.003218	0.013019	INVALID	0.002486	0.003766	0.036072	0.001067	0.026915	0.005624	0.001226	0.025943	0.001293	0.001258	0.001018	0.006767	0.005865	0.013643	0.003493	0.002107	0.003541	0.000205	0.002911
A	ArrayTube	meat juice	75	ELISA pretested	0.076124	0.082078	0.056528	0.052906	0.056984	0.030612	0.076963	0.296197	0.347152	0.38415	0.339361	0.022181	0.037325	0.023902	0.02403	0.0129	0.032365	0.017684	0.016887	0.018427	0.021134	0.003755	0.019571	0.055549	0.042768	0.019954	0.041659	0.029767	0.014194	0.027905	0.056266	0.022645	0.054042	0.016032	0.025833	0.016807	0.029433	0.009393	0.028157	0.030971	0.056145	0.02576	0.017107	0.016191	INVALID
A	ArrayTube	meat juice	76	ELISA pretested	0.053278	0.051947	0.048983	0.064983	0.042594	0.095642	0.050331	0.25889	0.265403	0.254878	0.290457	0.011173	0.010266	0.01487	0.011508	0.002487	0.010025	0.021369	0.006837	0.014004	0.008669	0.014416	0.008935	0.003798	0.002214	0.010665	0.006059	0.004923	0.010992	0.003824	0.023511	0.011432	INVALID	0.004942	0.039089	0.050684	0.010189	0.053193	0.001561	0.004409	0.00665	0.010473	0.005466	0.007907	0.006517
A	ArrayTube	meat juice	77	ELISA pretested	0.028972	0.032864	0.026277	0.047778	0.04119	0.021133	0.002793	0.21649	0.155045	0.213865	0.283837	0.016744	0.02143	0.061351	0.002775	0.007752	0.007485	0.007554	0.009134	0.050774	0.010638	0.007539	0.011399	0.016248	0.011021	0.014847	-0.005086	0.009074	0.031863	0.027279	0.004035	INVALID	0.01241	0.013848	0.015737	0.018167	0.034396	0.009081	0.006673	0.009911	0.012453	0.047536	0.012412	0.030716	0.014571
A	ArrayTube	meat juice	78	ELISA pretested	0.059359	0.082722	0.030901	0.153072	0.044669	0.057345	0.09147	0.151694	0.14183	0.109614	0.201705	0.011185	0.005539	0.038853	0.013582	0.010573	0.015549	0.043228	0.021444	0.023744	0.015539	0.012307	0.023263	0.048318	0.008061	0.009485	0.092221	0.104907	0.029216	0.019791	INVALID	0.163628	0.015004	0.022227	INVALID	0.015929	0.016329	0.026681	0.027582	0.017949	0.041682	0.00931	0.031555	-0.000363	0.000277
A	ArrayTube	meat juice	79	ELISA pretested	0.026489	0.03533	0.059657	0.040028	0.036038	0.068056	0.043357	0.121998	0.225056	0.209987	0.157697	0.005916	0.004377	0.005097	0.010599	0.000363	0.018102	0.029414	0.004462	0.013894	-0.000453	0.006753	0.003822	INVALID	-0.003937	0.007681	0.004484	0.033796	0.004761	0.015711	INVALID	-0.001581	0.008026	0.007478	0.051453	0.005264	0.009936	0.010958	0.004062	0.007831	0.004179	0.007623	0.011164	0.004899	-0.000183
A	ArrayTube	meat juice	80	ELISA pretested	0.066162	0.045317	0.07504	0.101105	0.036942	0.045676	INVALID	INVALID	0.16931	0.161847	0.17547	0.02964	0.020553	0.010989	0.009348	0.019599	0.00471	0.02886	0.019581	0.025341	-0.000391	0.003584	0.03378	0.006052	0.00887	0.012724	0.041101	0.006636	0.026194	0.005623	0.039825	0.007288	0.029548	0.020355	0.016896	0.025047	0.023337	0.019149	0.002888	0.012915	0.019857	0.014694	0.035375	0.018505	0.017511
A	ArrayTube	meat juice	81	ELISA pretested	0.025347	0.024464	0.059137	0.031346	0.096501	0.08499	0.057499	0.157117	0.10065	0.194311	0.173954	0.019353	0.008486	0.010485	0.006763	0.034769	0.018864	0.021999	0.009088	0.02599	0.017042	0.023639	0.010637	0.024405	0.035783	0.026772	0.029378	0.004228	0.013139	0.00728	0.004299	0.011217	0.01727	0.004752	0.01498	0.027817	0.013402	0.018635	0.018293	0.028999	0.014431	0.009818	0.021076	0.044726	0.016528
A	ArrayTube	meat juice	82	ELISA pretested	0.012442	0.020777	0.033105	0.01025	0.011683	0.02001	0.055358	0.11048	0.106806	0.099515	0.144807	INVALID	0.007515	0.010301	0.000925	0.005604	0.010576	0.016902	0.002601	0.000929	0.004252	0.002877	0.004352	0.000217	-0.000318	0.002722	0.03323	0.006004	0.004398	0.002529	0.007428	-0.004067	0.002017	0.002057	0.006091	0.002639	0.001694	0.001358	0.003881	0.000424	0.018132	0.004145	0.000516	0.002364	0.019147
A	ArrayTube	meat juice	83	ELISA pretested	0.028187	0.052017	0.020594	0.031274	0.005195	0.012927	0.008607	0.119439	0.122054	0.148969	0.151338	0.001895	0.053528	0.000814	0.018882	0.003671	0.011089	-0.001559	0.003706	-0.002414	0.036425	0.093805	-0.002184	0.016194	0.020126	0.032204	-0.005441	-0.004927	0.004193	0.008226	0.012529	0.019424	0.023865	0.001785	0.018551	0.000631	0.00395	0.004067	0.000173	0.002724	-0.00193	0.003234	0.004025	0.002287	0.003963
A	ArrayTube	meat juice	84	ELISA pretested	0.105213	0.072261	0.021035	0.111084	0.09697	0.064226	0.065383	0.214625	INVALID	0.200211	0.172464	0.008983	0.008434	0.013351	0.023783	0.005959	0.014371	0.010087	0.009528	INVALID	0.004074	0.067946	0.010386	0.011006	0.005443	0.005621	0.011997	INVALID	0.001678	0.004411	0.014568	0.017363	0.046057	0.001508	0.007681	0.030596	0.01174	0.017733	0.002658	0.005229	0.017077	0.021755	0.057013	0.004915	0.011357
A	ArrayTube	meat juice	85	ELISA pretested	0.105748	0.119288	0.111981	0.016017	0.016453	0.016385	0.061471	0.251782	0.235811	0.224764	0.235722	0.00591	0.007683	0.003493	0.004868	0.003132	0.006525	0.006228	0.001123	0.007288	INVALID	0.002589	0.003383	0.018773	0.004328	0.002528	0.004002	0.00111	0.039077	0.009005	0.003152	0.003153	0.025018	0.005413	0.005297	0.073246	0.0068	0.001773	0.002646	0.05529	-0.000209	0.004337	0.00182	0.039485	0.007545
A	ArrayTube	meat juice	86	ELISA pretested	0.110568	0.050095	0.050248	0.056444	0.116626	0.059625	0.134994	0.095997	0.103328	0.184299	0.132413	0.039385	0.006118	0.081032	0.019833	0.004177	0.001936	0.008828	0.004241	0.000335	0.00207	0.006279	0.002329	0.007596	0.004575	0.004471	0.017567	0.012797	0.008418	0.027759	0.01022	0.024095	0.012159	0.006103	0.016668	0.009659	0.008147	0.0191	0.005462	0.005463	0.00427	0.019909	0.00139	0.016245	0.012286
A	ArrayTube	meat juice	87	ELISA pretested	0.058087	0.074877	0.064523	0.055147	0.065465	INVALID	0.037605	0.21666	0.12874	0.199697	0.186325	0.010419	0.000984	0.007026	0.01325	0.004715	0.012986	0.001893	0.008851	0.008935	0.00711	0.009858	0.009752	0.009028	0.001133	0.007157	0.007149	INVALID	0.00754	0.01129	0.007434	0.005473	0.003667	0.002758	0.013244	0.006654	0.019787	0.002328	0.003525	0.009371	0.069583	0.007784	0.006065	0.049726	0.000152
A	ArrayTube	meat juice	88	ELISA pretested	0.028626	0.088452	0.023965	0.06342	0.086227	0.046627	0.009306	0.146169	0.164156	0.085582	0.194128	0.009504	0.009316	0.008789	INVALID	0.010495	0.007484	0.00739	INVALID	-0.001152	0.001409	0.002278	INVALID	0.011642	0.004759	0.053292	0.001404	INVALID	0.03227	0.150791	0.007253	0.072779	-0.000101	INVALID	0.003138	0.1117	0.031423	0.018623	0.100442	0.050677	0.049316	0.034493	0.130648	0.021199	-0.001963
A	ArrayTube	meat juice	89	ELISA pretested	INVALID	0.045452	0.045003	0.041114	0.038656	0.028654	0.049239	0.221718	0.199203	0.200502	0.267378	0.01172	0.035228	0.005107	0.002308	0.013583	0.014	0.020651	0.020731	0.013491	0.031174	0.005142	0.009255	0.01045	0.007774	0.013223	0.029267	0.046	0.010552	0.008941	0.005305	0.02207	0.003263	0.007344	0.006336	0.013391	0.00976	0.008378	0.010803	0.015309	0.036907	0.013189	0.009666	0.021469	0.050458
A	ArrayTube	meat juice	90	ELISA pretested	0.10464	0.09537	0.083672	0.115726	0.070083	0.124252	0.091069	0.191805	0.227168	0.218089	0.177702	0.010237	0.012092	0.018212	INVALID	0.008956	0.000574	0.003939	0.077419	0.064453	0.002788	-0.000308	0.0489	0.016652	0.01802	0.011588	INVALID	0.015149	0.025932	0.013523	0.010634	INVALID	0.023366	0.044636	0.012994	0.040006	0.067026	0.034133	0.008631	0.001776	0.003625	0.015402	0.014662	0.007033	0.004175
A	ArrayTube	meat juice	91	Trichinella positive	0.048553	0.01542	0.0635	0.052275	0.04289	0.019479	INVALID	0.086487	0.104402	0.1375	0.117992	0.030267	0.023535	0.025701	0.015788	0.022341	0.032091	0.020778	0.005981	0.04781	0.03103	0.00365	0.015914	0.00683	0.012169	0.039576	0.006145	0.019374	0.013278	0.038181	0.018928	0.017781	0.026505	0.020655	0.022571	0.03163	0.032421	0.028774	0.027829	0.01624	0.047841	0.015033	0.017031	0.055322	0.0215
A	ArrayTube	meat juice	92	Trichinella positive	0.10011	0.067836	0.019951	INVALID	0.029452	0.090652	0.020825	0.129386	0.171897	0.150412	0.067708	0.023838	0.029661	0.009049	0.011139	0.008138	0.01555	0.03713	0.011157	0.000254	0.008334	0.021156	0.007582	0.016934	0.014887	0.06185	0.01521	0.00745	0.010793	0.038953	0.013052	0.02486	0.064401	0.027027	0.050086	0.030173	0.019552	0.023142	0.038578	0.015154	0.016643	0.004945	0.033722	0.014165	0.004381
A	ArrayTube	meat juice	93	Trichinella positive	0.038064	0.021807	0.004288	INVALID	0.002113	0.016154	0.016937	0.099189	0.070812	0.088889	0.15653	0.003786	0.019326	0.005151	0.002391	0.003689	-0.005149	0.010031	0.003429	0.005987	0.012979	-0.001124	0.00122	0.010649	0.050788	0.011634	0.003685	0.018513	0.001923	0.000792	0.004508	0.009008	0.005735	0.007811	0.007251	0.002928	0.006404	0.017113	0.00317	0.002038	INVALID	0.004404	0.015633	0.010951	0.02407
A	ArrayTube	meat juice	94	Trichinella positive	0.047464	0.039304	0.043168	0.101402	INVALID	0.040837	0.036377	0.241079	0.202714	0.12965	0.143835	0.016778	0.022066	0.008186	0.041955	0.005372	0.012606	0.007453	0.03503	0.072539	0.039386	0.005548	0.011844	0.009237	0.003983	0.012118	0.012679	0.009258	0.009708	0.011026	-0.002077	0.008852	0.004169	0.008639	0.014958	0.013463	0.012425	0.011912	0.01221	0.005039	0.041462	0.006835	0.003784	0.009887	0.002362
A	ArrayTube	meat juice	95	Trichinella positive	0.045181	0.078461	0.077275	0.061034	0.057264	0.070608	0.098339	0.257188	0.179257	0.203242	0.205599	0.000925	0.010647	0.028232	0.02176	0.004076	0.018309	0.0642	0.006718	0.00159	0.004168	0.004956	0.005374	0.00714	INVALID	0.011079	0.024156	0.002946	0.007149	0.007129	0.003957	0.00077	0.012192	0.017626	0.016409	0.031937	0.010919	0.013808	0.011566	0.005375	0.002903	0.007094	0.010765	0.026009	0.002301
A	ArrayTube	meat juice	96	Trichinella positive	0.048711	0.058517	0.060927	0.020125	0.010097	0.013245	0.037833	0.215841	0.192668	0.191739	0.176095	0.001975	0.001444	0.006034	0.001265	0.005498	0.003896	INVALID	-0.008152	0.004596	0.017088	0.002205	0.020443	0.009715	0.003889	0.008775	INVALID	0.006943	0.009042	0.0048	INVALID	0.002308	0.015731	0.05371	0.001648	0.006864	0.006265	0.047357	0.001501	0.00756	0.006352	0.007084	0.005406	0.006428	0.007058
A	ArrayTube	meat juice	97	Trichinella positive	0.138503	0.046096	0.034784	0.099159	INVALID	0.084988	0.065295	0.214246	0.19282	0.156381	0.132198	0.018338	0.022797	0.003081	0.027631	0.002058	0.007816	0.008076	0.019646	0.003572	0.001755	0.00746	0.013358	0.006218	0.031734	0.019768	0.004269	0.002046	0.00948	0.005551	0.002017	0.00997	0.004919	0.014653	0.005836	0.02026	0.015458	0.027088	0.002734	0.005629	0.011339	-0.001575	0.000127	0.004494	-0.001739
A	ArrayTube	meat juice	98	Trichinella positive	0.040715	0.066128	0.045434	0.123084	0.107202	0.110918	0.122946	0.088262	0.170634	0.129009	0.118392	0.020867	0.010403	0.005273	0.034793	0.016199	0.019235	0.007527	0.006577	0.001122	0.010348	0.007591	0.013409	0.018299	0.022451	0.011228	0.004614	0.006017	0.008348	0.014552	0.008171	0.009051	0.008089	0.050569	0.006824	-0.002771	0.002942	0.000754	0.018464	0.005214	0.026629	0.002853	0.004123	0.017135	0.00184
A	ArrayTube	meat juice	99	Trichinella positive	0.032747	0.040218	0.028303	0.125586	0.080582	0.055555	0.047945	0.149143	0.13751	0.096066	0.127993	0.003506	0.0103	0.003195	0.010381	0.005005	0.012505	0.009318	0.01851	-0.00027	0.008403	0.005585	0.013807	INVALID	0.010473	-0.000863	0.01032	INVALID	0.012149	0.000537	0.018267	0.029441	0.006893	0.004355	0.003449	0.017973	0.000889	0.002912	0.00285	INVALID	0.003232	0.003515	0.008289	0.078108	0.002091
A	ArrayTube	meat juice	100	T. gondii positive	0.016947	0.014149	0.035834	0.037626	0.028595	0.057746	INVALID	0.126333	0.072555	0.121126	0.061634	0.01189	0.028692	0.024566	0.008936	INVALID	0.016502	0.029481	0.029725	0.015843	0.032397	0.020725	0.043128	0.014303	0.055966	0.01948	0.078825	0.022523	0.03268	0.025397	0.045471	0.015551	0.011314	0.012902	0.031045	INVALID	0.031035	0.039742	0.025079	0.001908	0.016358	0.013588	0.035956	INVALID	0.013495
A	ArrayTube	meat juice	101	T. gondii positive	0.063751	0.052394	0.028723	0.023058	0.071521	0.050921	0.030023	0.156196	0.139099	0.08072	0.103741	0.041523	0.016029	0.010828	0.027859	0.084002	0.014082	0.015891	0.011755	0.003825	0.007496	0.007388	0.013881	0.010929	0.008107	0.033307	0.04348	0.005881	0.018527	0.033675	0.026591	0.015696	0.010608	0.015167	0.010596	INVALID	0.021689	0.011133	INVALID	0.069246	0.016893	0.011617	0.035391	0.024501	0.009675
A	ArrayTube	meat juice	102	T. gondii positive	0.05518	0.013728	0.061677	0.019435	0.03568	0.079555	0.02657	0.115192	0.141517	0.108425	0.107413	0.047259	INVALID	0.01199	0.009985	0.008663	0.057388	0.004944	0.01296	0.007108	INVALID	0.012245	0.015366	0.018963	0.030181	0.05079	0.014264	0.016296	0.025484	0.079502	0.014715	0.024982	0.012595	0.017926	0.015387	-0.004969	0.026016	0.0158	0.01739	INVALID	0.024728	0.006824	0.016015	INVALID	0.020932
A	ArrayTube	meat juice	103	T. gondii positive	0.013475	0.009128	0.015631	0.012201	0.000441	0.016481	0.002147	0.03401	0.011561	0.025533	0.023496	0.004867	0.005106	0.024813	0.003263	0.003073	0.002504	0.002931	0.003561	0.001471	0.008377	0.004327	0.01048	0.002317	0.006327	0.003641	-0.002279	0.000619	0.002996	0.00049	-0.000972	0.003755	0.003094	0.001598	0.020853	0.001437	0.002973	0.003523	0.004718	0.003419	0.003652	0.041411	0.012538	0.004744	0.007155
A	ArrayTube	meat juice	104	T. gondii positive	0.01081	0.018121	0.007822	0.016796	0.084203	0.007933	0.020446	0.033016	0.033658	0.026572	0.043958	0.002028	0.003873	0.001669	0.013543	-0.004203	0.001705	0.006904	0.002377	-0.003601	0.001324	0.000975	INVALID	0.003514	0.00353	0.002007	0.00325	0.000965	0.003657	0.001287	0.004338	0.077278	0.007682	0.002725	0.028306	0.002425	0.003996	0.013129	0.00466	0.003868	0.001321	0.013835	0.003529	0.001968	0.003185
A	ArrayTube	meat juice	105	T. gondii positive	0.007538	0.009883	0.005346	0.016004	0.018957	0.003636	0.012004	0.003713	0.030566	0.012789	0.015913	0.008313	0.003297	0.003922	0.000389	0.008118	0.002351	0.002137	0.007966	-0.002128	0.003968	0.003404	0.015445	0.004063	0.005766	0.002334	0.003195	0.00233	-0.00074	0.003764	0.000662	-0.000967	0.001078	0.012269	-0.000265	0.002392	INVALID	-0.001011	0.008558	0.02902	0.002235	0.014139	0.002189	0.000554	0.00322
A	ArrayTube	meat juice	106	T. gondii positive	0.010852	0.012236	0.01626	0.001665	0.033267	0.006065	0.007183	0.008176	0.027916	0.027952	0.021863	0.005456	INVALID	0.009596	0.008641	0.010701	0.001294	0.010028	0.001931	-0.001597	0.000237	0.00066	0.008007	0.004738	0.003292	0.003385	0.005784	INVALID	0.00097	0.004673	0.000344	4.8e-05	0.004	0.003648	0.003577	0.009172	0.010824	0.008871	0.004259	0.003893	0.010318	0.010132	0.003627	0.009993	0.006591
A	ArrayTube	buffer	buffer	buffer	0.003265	0.013365	0.003571	0.000196	-0.000318	0.001893	0.001996	-0.000807	0.002291	0.006327	0.003568	0.002186	0.00309	0.000569	0.002534	0.000262	0.017271	0.001772	0.002499	0.007129	0.001831	0.002219	0.006146	0.000938	2.3e-05	-0.000432	0.004097	0.003609	-0.00125	0.006409	0.002172	0.00473	0.001949	0.006776	0.001164	0.003852	0.004828	0.002321	0.001172	0.000777	0.002902	0.000711	0.002369	0.006192	0.000357
A	ArrayStrip	meat juice	1	ELISA pretested	0.050743	0.072973	0.051563	0.056314	0.052225	0.047768	0.07717	0.163578	0.15249	0.138916	0.141443	0.015824	0.015972	0.02402	0.023007	0.025037	0.007411	0.00333	0.0179	0.020913	0.012154	0.028175	0.011465	0.022218	0.014667	0.019168	0.015203	0.012761	0.035288	0.031047	0.032481	0.034597	0.012499	0.082582	0.020017	0.00343	0.019377	0.016889	0.016605	0.029327	0.015389	0.015108	0.019621	0.03523	0.018339
A	ArrayStrip	meat juice	2	ELISA pretested	0.100228	0.111737	0.06719	0.089313	0.092791	0.0818	0.085009	0.232264	0.295204	0.185648	0.234515	0.016788	0.010038	0.018066	0.020124	0.016583	0.00844	0.01857	0.022321	-0.01713	0.018796	0.017255	0.016394	0.013828	0.014616	0.018031	0.016082	0.033274	0.024033	0.024479	0.02637	0.003188	-0.004414	0.015726	INVALID	0.008686	0.010727	0.012458	0.004095	0.015261	0.010747	0.007181	INVALID	0.015936	0.015908
A	ArrayStrip	meat juice	3	ELISA pretested	0.033877	0.041749	0.054079	0.015789	0.054012	0.039687	0.051448	0.128945	0.116278	0.132901	0.177676	0.006174	0.00534	0.00114	0.007603	0.002328	0.026934	0.002063	0.006996	0.001212	0.057509	0.015003	0.001457	0.001817	0.008777	0.00347	8.4e-05	0.014563	0.013462	0.017753	0.011458	8.9e-05	0.002177	0.003495	0.059432	0.001011	0.002588	0.005362	-0.003726	0.000158	-0.00054	0.005663	0.007382	-0.002866	0.007673
A	ArrayStrip	meat juice	4	ELISA pretested	0.035101	0.069357	0.03299	0.040254	0.030033	0.024306	0.046522	0.096104	0.1374	0.135556	0.08641	0.005063	0.00631	0.03162	0.011821	0.008282	0.010554	0.006576	0.0741	0.001166	0.001944	0.00981	0.014563	0.008084	INVALID	0.007587	0.018352	0.013453	0.012919	0.016971	0.020869	0.006829	0.001981	0.006988	0.010553	0.004624	0.007961	0.021724	0.004383	0.001363	0.007751	0.007685	0.000272	0.010825	0.009271
A	ArrayStrip	meat juice	5	ELISA pretested	0.041292	0.0616	0.035085	0.050689	INVALID	0.041734	0.127718	0.176335	0.146311	0.140948	0.148677	0.00834	0.003311	0.014264	0.007094	0.006723	0.006661	0.003164	-0.001029	0.001142	0.00369	0.009724	0.00581	0.011724	0.081935	INVALID	0.00184	0.007296	0.007574	0.018704	0.00948	0.004792	0.008639	0.02598	0.01202	0.022195	0.005688	0.005289	0.006099	0.003827	0.013035	0.007223	0.006698	0.006648	0.004074
A	ArrayStrip	meat juice	6	ELISA pretested	0.05714	0.060566	0.042458	0.05028	0.02921	0.033039	0.028225	0.110794	0.070832	0.168632	0.086401	0.046879	0.002876	0.00136	-0.003658	0.002532	0.014221	0.005176	0.013673	0.008015	0.021659	0.002548	0.049495	0.008645	0.008804	0.010424	0.056187	0.006847	0.024687	0.017566	0.063713	0.014049	0.008419	0.038534	0	0.00745	-0.004403	0.015606	0.011262	0.005774	0.001223	0.005295	0.003876	0.004245	0.006326
A	ArrayStrip	meat juice	7	ELISA pretested	0.062368	0.044772	0.044756	0.148749	0.155676	0.157868	INVALID	0.113623	0.166284	0.123345	0.158166	0.027575	0.008803	0.000651	0.017666	0.006253	0.003719	0.001521	0.009124	0.033069	0.024492	-0.000942	0.006227	0.014614	0.006063	0.005313	0.00588	INVALID	0.014851	0.007491	0.021224	INVALID	0.007924	0.005807	0.027801	0.010449	0.003119	0.004105	0.000313	-0.003432	0.001695	0.003078	0.011336	0.039807	0.010259
A	ArrayStrip	meat juice	8	ELISA pretested	0.017206	0.026536	0.015864	0.013114	0.009121	0.013304	0.012889	0.034484	0.038878	0.039206	0.046053	0.007061	0.001049	0.004435	0.002308	0.004496	0.004153	0.007235	0.000987	0.00835	0.008717	0.006509	0.002175	0.007767	0.006649	0.000107	0.003318	0.003459	0.002404	0.010237	0.003684	0.004647	0.002333	0.00291	0.004099	0.006735	-0.000537	0.002719	0.001809	0.000329	0.004425	0.00374	-0.000859	0.004627	0.002808
A	ArrayStrip	meat juice	9	ELISA pretested	0.030943	0.02272	0.024947	0.034492	0.010806	0.024333	0.021636	0.048936	0.038338	0.044719	0.041484	0.004447	0.035668	0.001612	0.002481	0.006505	0.013916	0.011543	0.001908	0.006321	0.014968	0.014886	0.004539	0.008894	0.004707	0.008926	0.00745	0.061526	0.012755	0.01986	0.015986	0.053179	0.006399	0.004857	-0.00126	0.009699	0.004301	0.000109	0.004914	0.003516	0.002516	-0.006367	0.004162	0.00502	0.0099
A	ArrayStrip	meat juice	10	ELISA pretested	0.050815	0.070678	0.060889	0.062767	0.05926	0.113289	0.048089	0.198406	0.135051	0.097201	0.130402	0.022652	0.03555	0.027415	0.015131	0.01575	0.025288	0.029945	0.024403	0.023876	INVALID	0.060498	0.008956	0.030182	0.029067	0.031816	0.020611	INVALID	0.018405	0.028025	0.028051	0.009986	0.018953	0.011542	0.008194	0.019083	0.016788	0.03815	0.005002	0.003535	0.007229	0.013369	0.034983	0.027133	0.013185
A	ArrayStrip	meat juice	11	ELISA pretested	0.013668	0.022824	0.026605	0.014443	0.018041	0.008459	0.011607	0.044956	0.099902	0.027857	0.056092	0.003039	0.003028	0.009896	0.006398	0.003525	0.00055	0.003037	0.000905	0.002757	0.006097	0.004612	0.009303	0.000778	0.007952	0.008604	0.011727	0.005578	0.007185	0.00261	-0.001301	0.010094	0.001021	0.005947	-5.1e-05	0.003321	0.004082	0.003277	0.001968	0.004008	3.6e-05	0.002725	0.005963	0.041847	0.004083
A	ArrayStrip	meat juice	12	ELISA pretested	0.035872	0.034713	0.02705	0.009316	0.011145	0.011363	0.01039	0.039302	0.039943	0.033557	0.054904	0.000288	0.00308	0.003451	0.02855	0.011024	0.004212	0.003109	0.003124	0.040735	0.00558	0.004582	0.012452	4.4e-05	0.003719	0.002186	0.003106	0.006398	0.010302	0.008999	0.011446	0.009663	0.005939	0.028955	-0.000877	0.00179	0.000522	0.002995	0.002165	-0.000128	0.002167	0.005972	9.1e-05	-0.000578	0.006702
A	ArrayStrip	meat juice	13	ELISA pretested	0.01222	0.015698	0.02716	0.010856	0.005361	0.012782	0.011001	0.027132	0.033492	0.022522	0.024982	0.002271	-0.002259	0.001779	0.002054	0.004024	-9e-05	0.00334	0.000133	0.047861	0.000995	0.007136	0.006377	0.002993	0.004297	0.001751	0.003209	0.0073	0.007141	0.010593	0.006165	0.002484	0.001168	0.001919	0.00087	0.003562	-0.000248	0.00028	0.003314	-0.000776	0.056793	0.007416	0.005002	-0.002449	0.048539
A	ArrayStrip	meat juice	14	ELISA pretested	0.09918	0.084489	0.105675	0.119648	0.095812	0.078212	0.091626	0.220006	0.205724	0.151874	0.209058	0.054969	0.030719	0.022597	0.028066	0.02036	0.018202	0.017725	0.015265	0.028098	0.017614	0.016232	0.029608	0.022417	INVALID	0.02672	0.023006	0.059752	0.054551	0.048438	0.034801	0.033588	0.027184	0.024194	0.025419	0.035652	0.023533	0.021519	0.023088	0.040206	0.027883	0.019791	0.02455	0.040583	0.026546
A	ArrayStrip	meat juice	15	ELISA pretested	0.05293	0.070446	0.08608	0.084665	0.061304	0.068158	0.081633	0.217901	0.204143	0.139711	0.172791	INVALID	0.001398	0.004839	0.010073	0.028791	0.00818	0.004935	0.007055	0.004451	0.007461	0.0069	0.014166	0.001874	-0.000115	0.006234	0.002078	0.003566	0.024462	0.007898	0.009572	0.000662	INVALID	0.004503	0.002702	0.055273	0.001919	0.002732	INVALID	-0.001094	0.009912	0.009732	0.005938	0.002605	0.003775
A	ArrayStrip	meat juice	16	ELISA pretested	0.15281	0.224583	0.26121	0.16612	0.110048	0.109648	0.107267	0.233154	0.17576	0.234906	INVALID	0.118243	0.0696	0.059557	0.107069	INVALID	0.074778	0.07476	0.074225	0.120387	0.086065	0.089026	0.056419	0.101399	0.07412	0.087334	0.080892	0.116641	0.043553	INVALID	0.065545	0.090541	0.093375	0.064918	INVALID	0.114406	0.073016	0.070366	INVALID	INVALID	0.074974	0.050764	0.102074	INVALID	0.073001
A	ArrayStrip	meat juice	17	ELISA pretested	0.037612	0.036141	0.030767	0.032028	0.028569	0.022044	0.019205	0.066512	0.06699	0.052726	0.062939	0.020342	0.02	0.045426	0.02002	0.013237	0.010604	0.023427	0.0092	0.016033	0.009641	0.010553	0.010223	0.013324	0.013068	0.012657	0.007086	0.025973	0.033976	0.022368	0.017759	0.024359	0.020475	0.012377	0.009685	0.017108	0.01344	0.012961	0.01064	0.009869	0.01206	0.010889	0.013869	0.014164	0.015502
A	ArrayStrip	meat juice	18	ELISA pretested	0.031026	0.065484	0.036785	0.040571	0.040012	0.037284	0.025677	0.098213	0.069413	0.095679	0.109947	0.017588	0.022047	0.021845	0.010494	0.00225	0.004431	0.006195	0.005954	0.082749	0.005398	0.002171	0.004107	-0.001748	0.044821	0.001659	0.004586	0.015329	0.011705	0.018817	0.011458	0.005731	0.010257	0.012152	0.008839	0.011604	0.001782	0.002839	-0.006987	0.002077	0.000916	0.004348	0.002019	0.005032	0.013181
A	ArrayStrip	meat juice	19	ELISA pretested	0.023174	0.027786	0.010228	0.014421	0.047006	0.012246	0.015039	0.061585	0.049456	0.048476	0.039006	0.008969	0.018056	0.001467	0.001174	-0.002493	0.001844	0.005381	0.018413	0.003773	0.00168	0.003567	0.02347	0.00207	0.002414	0.003971	0.001822	0.003327	0.033266	0.02858	0.022375	0.001017	-0.000411	0.015621	0.034583	-7.9e-05	0.000608	0.004581	0.003993	-0.000455	0.048586	0.001977	0.005893	0.00815	0.002848
A	ArrayStrip	meat juice	20	ELISA pretested	0.034426	0.090029	INVALID	0.04023	0.054455	-0.003526	0.036839	0.088178	0.149377	0.09868	0.125264	0.013033	0.003445	0.009272	0.006955	0.003774	0.001986	0.006841	0.013468	0.020124	0.00346	0.003405	0.006339	0.00336	INVALID	0.001716	0.018456	-0.003297	0.022838	0.001875	0.01556	0.010002	0.003048	0.00253	0.006892	0.017732	0.004934	0.002325	0.021479	0.042873	0.01716	0.000191	0.004082	0.061502	0.002013
A	ArrayStrip	meat juice	21	ELISA pretested	0.048316	0.024506	0.054274	0.021722	0.030232	0.02703	0.015234	0.086909	0.120857	0.072236	0.080817	0.000373	-7.8e-05	0.004931	0.002559	0.021053	-0.000215	0.010003	INVALID	0.003368	0.000904	0.004973	0.003588	0.003243	0.001699	-0.000803	-0.000225	0.093764	0.015277	0.007772	0.011111	0.010259	0.004628	0.016377	0.015619	0.001751	0.004739	-0.001617	0.003693	-0.00072	0.007612	0.002549	0.003759	7.9e-05	0.00266
A	ArrayStrip	meat juice	22	ELISA pretested	0.103463	0.186869	0.122593	0.155753	0.124471	0.118101	0.123477	INVALID	0.269216	0.216386	0.03181	-7.5e-05	0.00555	0.009411	0.011709	-0.0025	0.014138	0.014725	0.012279	0.008666	0.018018	0.012552	0.007608	0.002784	0.133368	INVALID	0.003071	0.028588	0.00274	0.02472	0.02324	0.01	0.001558	0.00655	0.013642	0.017999	0.000623	0.00308	0.005136	0.070606	0.012249	0.002433	-0.002846	-0.001925	0.002906
A	ArrayStrip	meat juice	23	ELISA pretested	0.087207	0.067862	0.071355	0.060212	0.051287	0.074471	0.088703	0.155747	0.157853	0.165715	0.138901	0.006214	0.00719	0.005795	0.006599	INVALID	0.002344	0.002058	0.006148	0.02381	0.016885	0.008834	0.005858	INVALID	0.001538	0.00183	0.005733	0.01028	0.00807	0.077974	0.009424	0.051752	0.009535	0.000248	0.0063	0.00224	0.004642	0.000712	0.027323	0.001616	0.00574	0.005927	0.004168	0.001879	0.026951
A	ArrayStrip	meat juice	24	ELISA pretested	0.013739	0.041977	0.031625	0.004597	0.007253	0.009089	0.027873	0.04222	0.04321	0.026297	0.031999	0.009869	0.007071	0.008198	0.006606	0.010859	0.000499	0.015263	0.001457	0.000128	0.001423	0.008088	0.008108	-0.001308	0.003801	0.005114	0.007767	0.005154	0.002664	0.002284	0.002922	0.001133	0.010289	0.001822	0.002506	0.004158	0.04342	0.004137	0.006091	0.003137	0.059097	-0.002737	0.005007	INVALID	-0.001373
A	ArrayStrip	meat juice	25	ELISA pretested	0.048871	0.026975	0.029954	0.038967	0.039276	0.017418	0.030218	0.0694	0.104448	0.045923	0.134982	0.008945	0.003568	0.021836	0.013251	0.036343	0.059735	-0.000612	0.005141	-0.000417	0.011334	0.005058	0.004227	0.000528	0.001047	-0.002512	0.003709	0.016074	0.00911	0.013344	0.00804	0.003006	-0.002985	0.015023	INVALID	0.006245	0.001518	0.008216	0.005126	0.006688	0.010076	0.005568	0.010235	0.007944	0.008391
A	ArrayStrip	meat juice	26	ELISA pretested	0.023134	0.035257	INVALID	0.016824	INVALID	0.002449	INVALID	INVALID	0.081719	0.079944	0.0707	INVALID	-0.005292	-0.002257	0.015109	INVALID	-0.001799	-0.002557	0.013156	INVALID	0.118684	0.004604	0.014758	INVALID	INVALID	0.014667	0.028684	0.117999	0.053709	INVALID	0.123558	0.022893	INVALID	INVALID	0.001465	INVALID	0.06052	0.022939	-0.00294	INVALID	-0.002347	INVALID	INVALID	INVALID	0.001035
A	ArrayStrip	meat juice	27	ELISA pretested	0.095344	0.061609	0.096743	0.06015	0.069703	0.064398	0.049343	INVALID	0.177792	0.145676	0.147024	-0.000657	0.014333	0.014626	0.00576	INVALID	0.014034	0.019938	0.01338	0.027487	INVALID	0.019826	0.020922	0.004021	0.044533	0.016845	0.002737	0.021878	0.044134	0.022772	0.016943	0.017789	0.00509	0.011329	0.020475	0.017247	0.036291	0.041019	0.00898	0.016724	0.003095	0.008937	0.008567	INVALID	0.018801
A	ArrayStrip	meat juice	28	ELISA pretested	0.052584	0.036714	0.037202	0.019005	0.034835	0.006349	0.035301	0.144043	0.069601	0.06265	0.080367	0.001632	0.004528	INVALID	0.008906	0.001304	0.008885	INVALID	0.005071	0.002204	0.005192	0.015297	0.002368	0.006721	-0.002566	0.0481	0.022215	0.026067	0.01887	0.020327	0.003283	0.008849	0.014456	0.007985	0.004094	INVALID	0.007019	INVALID	INVALID	0.019659	0.005095	-0.000659	0.002397	0.005181	0.011725
A	ArrayStrip	meat juice	29	ELISA pretested	INVALID	0.060985	0.028416	0.03952	INVALID	0.019155	INVALID	INVALID	0.066604	0.034707	0.069889	0.009133	0.010969	0.011892	0.014017	-0.000523	0.0099	0.015013	INVALID	0.002209	0.017839	0.015117	0.029791	0.141495	0.001261	0.086307	0.010252	0.007519	0.003138	0.001514	INVALID	0.011071	0.013844	-0.0014	INVALID	0.110128	0.007395	0.028453	0.010412	0.017237	0.038332	0.029598	INVALID	0.000184	INVALID
A	ArrayStrip	meat juice	30	ELISA pretested	0.04639	0.05493	0.049363	0.077852	0.074217	0.089514	0.072383	0.135037	0.185993	0.142668	0.125362	0.052232	0.012273	0.004886	0.003325	INVALID	0.004168	0.002973	0.023573	0.043421	0.034712	0.010635	0.07292	0.017491	0.011779	0.020637	0.060725	0.027647	0.00781	0.021492	0.01772	0.006549	0.005078	0.002679	-0.002095	0.006042	0.015176	0.003533	0.00196	0.002344	INVALID	0.003777	0.003009	0.091442	0.004002
A	ArrayStrip	meat juice	31	ELISA pretested	0.107692	0.127696	0.186936	0.237273	0.218835	0.172277	0.171214	0.419943	0.326787	0.31665	0.383393	0.02344	0.004951	0.013148	0.002001	0.001888	0.007703	0.021085	0.073697	0.018225	0.014874	0.005931	-0.000107	0.019491	0.015802	0.016978	0.041652	0.058858	0.04381	0.050887	0.030579	0.011297	INVALID	0.040549	0.015568	0.014074	0.017275	0.019221	0.01189	0.01614	0.021302	0.016237	0.014979	0.017784	0.020489
A	ArrayStrip	meat juice	32	ELISA pretested	0.103948	0.130853	0.150838	0.159629	0.134911	0.135044	0.136744	0.291337	0.327483	0.238624	0.280451	0.03007	0.019522	0.021252	0.027645	0.016634	0.020388	0.036275	0.023047	INVALID	0.010667	0.012361	0.016609	0.025765	0.008823	0.024439	0.017593	0.03479	0.043423	0.035131	0.030156	0.037313	0.035959	0.040856	0.021101	0.026132	0.026941	0.023031	0.026471	0.026827	0.022416	0.01437	0.026415	0.024821	0.022089
A	ArrayStrip	meat juice	33	ELISA pretested	0.145866	0.117138	0.177145	0.190598	0.157972	0.216876	0.174614	0.348941	0.341357	0.279693	0.340356	INVALID	0.077531	0.058772	0.019442	INVALID	0.021445	0.02122	0.008898	INVALID	0.019387	0.013956	0.006071	0.001256	0.002929	0.080784	0.004164	0.024366	0.006499	0.070078	0.015058	0.012686	-0.001561	0.024831	0.021558	0.016521	0.008179	0.013098	0.037311	0.01979	0.021032	0.03092	0.002219	INVALID	0.091875
A	ArrayStrip	meat juice	34	ELISA pretested	0.090636	0.123168	0.126978	0.114473	0.129301	0.095236	0.100661	0.294285	0.269793	0.25947	0.26244	0.008868	0.00812	0.004793	0.001125	0.007303	0.008858	0.008358	0.008539	0.000819	0.01185	0.008942	0.003948	INVALID	0.021728	0.022135	0.008604	0.020539	0.015485	0.014451	0.021774	0.007014	0.00738	0.004949	0.023554	0.040361	0.005523	0.005267	-0.003783	INVALID	0.00369	0.004262	0.002278	0.002853	0.018829
A	ArrayStrip	meat juice	35	ELISA pretested	0.110759	0.103766	0.11801	0.118955	0.082189	0.087801	0.10478	0.273697	0.247013	0.221047	0.271797	0.014568	0.007137	0.019685	0.011935	0.01322	0.042461	0.01869	0.016378	0.006969	0.00134	0.027169	0.00362	0.020778	0.031047	0.00735	0.005014	0.026682	0.011352	0.010937	0.029038	0.014002	0.002099	0.013525	INVALID	0.030581	0.037938	0.004915	0.007522	INVALID	0.00283	INVALID	0.015733	0.013058	0.024364
A	ArrayStrip	meat juice	36	ELISA pretested	0.116169	0.161643	0.154517	0.131819	0.116108	0.097706	0.115359	0.336085	0.336103	0.329414	0.269231	0.00693	0.004606	0.017236	0.042476	0.010973	0.00915	-0.003673	0.011202	0.00531	0.005344	0.006425	0.005051	0.003788	0.000125	0.005635	0.004629	0.029567	0.057794	0.018199	0.028953	-0.000889	0.003802	-0.002118	INVALID	0.027256	0.005199	0.013866	0.013871	0.002809	0.00611	0.007932	-0.001459	INVALID	-0.00122
A	ArrayStrip	meat juice	38	ELISA pretested	0.092635	0.020329	0.015923	0.099751	0.016238	0.015296	INVALID	INVALID	0.250055	0.031101	0.06504	0.012079	0.057054	0.019949	0.013497	INVALID	0.032531	0.003748	0.004966	INVALID	0.028443	0.038226	0.018574	0.005941	INVALID	INVALID	0.012438	0.012221	INVALID	0.005725	0.003747	0.035135	INVALID	0.054074	INVALID	-0.00056	0.01112	0.013836	0.015081	0.0038	0.008298	-0.007306	-0.011129	0.02035	0.00635
A	ArrayStrip	meat juice	39	ELISA pretested	0.030963	INVALID	0.093023	0.026943	0.033929	0.025725	0.035595	0.080171	0.107493	0.079821	0.13312	INVALID	0.008111	0.009264	0.010311	0.012417	0.003776	-0.000229	0.017797	0.005007	0.051719	0.001344	0.005029	0.012411	INVALID	0.010444	0.027786	0.024067	0.026676	0.021578	0.01787	0.018627	0.036851	0.006632	0.003748	0.014801	0.00852	0.085934	0.010014	0.014187	0.011442	0.010945	0.006928	0.018546	0.007458
A	ArrayStrip	meat juice	40	ELISA pretested	0.047846	0.039121	0.049423	0.006013	0.03788	0.035594	0.043621	0.091909	0.083655	0.093992	0.114932	0.019044	0.044097	0.00627	0.016544	0.01701	0.05872	0.011785	0.008902	0.012594	0.007383	0.008756	0.006963	0.051281	0.006166	-0.00136	0.021136	0.021891	0.022972	0.027517	0.025663	0.048123	0.009391	0.015429	0.0053	-0.000734	0.00637	0.005994	0.004093	0.003083	0.006198	0.005887	-0.005247	0.008894	0.04756
A	ArrayStrip	meat juice	41	ELISA pretested	0.042042	0.054085	0.048226	0.024369	0.064934	0.023499	0.029836	0.136205	0.172019	0.105015	0.115115	INVALID	0.009723	0.080258	0.00235	0.042741	0.003664	0.004259	0.006668	0.011033	0.001443	0.004505	0.000816	-0.001723	0.005267	INVALID	0.000263	0.037924	0.001758	0.028868	0.001333	-0.002335	INVALID	INVALID	0.011912	0.00359	0.004665	0.004011	0.004503	0.0031	0.004497	0.021324	0.000936	0.031146	-0.000105
A	ArrayStrip	meat juice	42	ELISA pretested	0.04517	0.048421	0.062462	0.036224	0.026129	0.037514	0.030012	0.096184	0.116079	0.126136	0.097382	0.021635	0.022538	0.011644	0.017334	0.021239	0.021541	0.012747	0.015921	0.015826	0.015226	0.013142	0.015341	0.040253	0.032127	0.029883	0.022172	0.027967	0.034689	0.019566	0.049155	0.028761	0.065353	0.033394	0.038316	0.031429	0.039938	0.028533	0.027513	0.026031	0.028571	0.020662	0.03322	0.022892	0.031635
A	ArrayStrip	meat juice	43	ELISA pretested	0.01747	0.025808	0.023217	0.021267	0.014828	0.016557	0.03421	0.054098	0.036439	0.030118	0.037492	0.001438	0.001929	0.00131	0.003955	0.001849	0.001294	-0.001497	0.001362	0.004755	0.006861	0.013268	0.005723	-0.00012	0.015411	0.019221	0.003761	0.005572	INVALID	0.010952	0.01436	0.000481	0.001138	4.1e-05	0.013168	0.001211	-0.000235	0.024695	0.004968	0.012079	0.004567	-8e-06	0.000942	0.000906	0.003731
A	ArrayStrip	meat juice	44	ELISA pretested	0.031232	0.023863	0.024894	0.050827	0.029471	0.018753	0.022553	0.093838	0.055598	0.054141	0.0532	0.004591	0.001712	0.01269	0.007	0.024744	0.00959	0.003255	0.02861	0.003957	0.018652	0.014071	0.002631	0.05226	0.005379	0.003804	0.002785	0.034273	0.006159	0.024534	0.011832	0.013079	0.010605	0.029309	0.004809	-0.002393	0.006871	0.005945	0.018921	0.000572	0.01054	0.002875	0.004368	0.014872	0.003586
A	ArrayStrip	meat juice	45	ELISA pretested	0.046838	0.053581	0.029875	0.023057	0.019876	0.011953	0.032654	0.1054	0.071938	0.085413	0.073828	0.007574	0.016113	0.013423	0.006182	0.010552	0.011547	0.012983	0.008327	0.016433	0.009476	0.02068	0.001322	0.003084	0.023598	0.009964	0.007508	0.003186	0.009716	0.00995	0.016509	0.01422	0.00522	0.019948	0.018744	0.003126	0.004406	0.017495	-0.003958	0.012477	0.011691	0.006723	INVALID	0.001742	0.009002
A	ArrayStrip	meat juice	46	ELISA pretested	0.019393	0.047637	0.054833	0.049424	0.068516	0.061768	0.097634	0.099079	0.096207	0.097761	0.095991	0.004465	-0.001797	0.014599	0.003076	INVALID	0.005808	0.003582	0.003935	INVALID	0.003739	0.00358	0.004057	0.014565	0.008759	0.035067	0.008888	INVALID	0.017116	0.014851	0.003968	0.005116	0.005192	0.006347	-0.003275	0.004542	0.003962	0.000543	0.004426	0.000816	0.001975	0.003454	-0.001303	0.029896	0.036279
A	ArrayStrip	meat juice	47	ELISA pretested	0.045691	0.027088	0.051008	0.099462	0.029099	0.027921	0.03571	0.078112	0.078202	0.074797	INVALID	0.066049	0.000569	0.004825	0.031097	0.008196	0.017861	-0.008802	0.007508	INVALID	0.009442	0.006486	0.011768	0.002007	INVALID	0.010217	0.004819	0.020011	0.104631	0.059924	0.031308	0.00662	-0.002168	0.009038	0.012008	0.004574	0.008494	INVALID	0.016748	0.006155	INVALID	0.003745	0.016805	INVALID	0.006582
A	ArrayStrip	meat juice	48	ELISA pretested	0.126251	0.047958	0.053288	0.065876	0.151333	0.001859	INVALID	0.161835	0.153643	INVALID	0.135907	0.026707	0.023373	-0.001759	INVALID	INVALID	0.013585	INVALID	0.013489	INVALID	0.017916	0.032409	0.012683	0.081865	INVALID	INVALID	INVALID	INVALID	INVALID	0.297491	INVALID	0.017007	INVALID	INVALID	0.02928	INVALID	INVALID	-0.006417	0.015436	-0.000646	INVALID	-0.002318	0.059798	0.004259	0.004016
A	ArrayStrip	meat juice	49	ELISA pretested	0.03716	0.152133	0.069994	0.093074	INVALID	INVALID	0.036557	INVALID	INVALID	INVALID	INVALID	0.002806	0.036146	0.211009	INVALID	INVALID	0.009114	INVALID	0.503373	0.009041	0.039929	0.03095	INVALID	0.000542	INVALID	INVALID	0.003528	0.02519	INVALID	INVALID	INVALID	0.020231	0.058479	INVALID	INVALID	0.003715	0.030015	0.050293	-0.000507	0.001936	-0.001806	INVALID	0.019587	0.018518	0.01067
A	ArrayStrip	meat juice	50	ELISA pretested	0.071944	0.076125	0.078229	0.094073	0.06965	0.042254	0.075754	0.185161	0.199699	0.200894	0.230812	0.011567	0.010565	0.013682	0.006376	0.007844	0.002956	0.008691	0.006135	0.003154	0.003626	0.009618	0.019699	0.005184	0.001411	0.011298	-3.3e-05	0.023733	0.021168	0.050281	0.020844	0.020003	0.010302	0.001794	0.010787	0.006856	0.005151	0.001617	0.005869	0.043238	0.00296	0.009037	0.006225	-0.007187	0.018685
A	ArrayStrip	meat juice	51	ELISA pretested	0.117752	0.097373	0.094931	0.091156	0.111907	0.121763	0.066677	0.16011	0.168988	0.203916	0.19167	-0.001969	0.006044	0.003687	0.00083	0.001419	INVALID	0.002682	0.002405	-0.001345	0.003982	0.021207	0.000991	0.000981	0.010147	1.7e-05	0.005248	INVALID	0.086639	0.008155	0.007385	0.000355	INVALID	0.000834	0.025304	INVALID	0.007408	0.003031	0.033995	-0.001324	0.001167	0.003926	-0.00029	0.004109	0.018845
A	ArrayStrip	meat juice	52	ELISA pretested	0.019049	0.045134	0.04967	0.091947	0.063775	0.051449	0.048382	0.141154	0.099545	0.110891	0.092705	0.004833	0.001551	0.00656	0.003044	0.000433	0.005725	0.000793	0.006447	0.003784	-0.000133	0.000201	0.005324	0.00424	-0.00195	0.010128	0.003722	0.005276	0.009954	0.012958	0.008168	-0.000116	0.003151	0.002867	-0.000139	0.006163	0.003895	0.00652	0.012842	0.006971	0.000605	-0.000355	0.0029	0.00014	0.037179
A	ArrayStrip	meat juice	53	ELISA pretested	0.017012	0.013351	0.001545	0.02281	0.024162	0.018972	0.034066	INVALID	0.047547	0.059006	0.041527	0.014201	0.005239	0.00107	0.003076	-0.000869	0.003476	0.003581	0.006469	INVALID	0.000124	-0.001751	0.003677	0.004255	0.060241	0.006226	0.003381	0.042837	0.059344	0.017999	0.002809	INVALID	0.016701	0.005243	0.001389	0.024902	0.035825	0.118593	0.027196	0.001392	0.036615	0.001515	-0.000423	-0.001706	0.011634
A	ArrayStrip	meat juice	54	ELISA pretested	0.008613	0.021837	0.01663	0.040699	0.017396	0.040434	0.025082	0.082272	0.116331	0.077134	0.068849	INVALID	0.003677	0.003111	0.030373	INVALID	0.008152	0.006038	0.04872	INVALID	0.020152	0.010329	INVALID	0.020679	0.034675	INVALID	0.032304	0.006501	INVALID	0.028025	0.008728	INVALID	0.037826	0.000579	0.003275	0.02932	0.029715	0.010799	0.007063	0.00961	INVALID	-0.002992	0.002188	-7.5e-05	-0.000809
A	ArrayStrip	meat juice	55	ELISA pretested	0.047099	0.048721	0.04781	0.022056	0.045101	0.039516	0.041343	0.138054	0.170187	INVALID	0.152979	0.004124	0.001801	0.001284	0.003337	0.001079	0.001754	0.009377	0.02512	0.003448	0.006499	0.015882	INVALID	0.000862	-0.006597	0.004093	0.017525	0.020013	0.005461	0.008371	0.002496	0.021625	0.001423	0.006809	0.023406	0.003291	0.003834	0.000944	0.008987	0.000508	-0.000958	0.01616	0.003951	0.001291	0.004207
A	ArrayStrip	meat juice	56	ELISA pretested	0.023037	0.043291	0.057081	0.109503	0.079798	0.054534	0.012071	0.119482	0.092042	0.094668	0.0727	0.056683	0.003504	-0.004334	0.000943	0.003559	INVALID	0.018271	-0.002747	INVALID	-0.001914	-0.002072	0.002052	INVALID	0.005723	0.00336	INVALID	0.001111	0.020375	-0.003201	0.005077	0.002745	0.043068	INVALID	0.03535	INVALID	0.005788	0.00193	0.004255	-0.006071	0.001376	0.009538	0.009886	INVALID	0.005614
A	ArrayStrip	meat juice	57	ELISA pretested	0.033783	0.021791	0.009402	0.022729	0.020662	0.003664	0.030664	0.11876	INVALID	0.047868	0.066468	0.004224	0.002845	-0.00645	0.024082	0.003451	0.002267	0.004576	0.008292	0.000849	0.003846	-0.00375	0.006116	0.015678	0.004496	0.00627	0.020559	0.013102	0.019971	0.013771	0.012275	0.003436	INVALID	0.004262	0.003937	0.001658	0.041836	0.00193	0.009983	0.001381	0.005051	0.004185	0.005772	0.005494	0.002203
A	ArrayStrip	meat juice	58	ELISA pretested	0.019481	INVALID	0.0349	0.023507	0.007574	0.016789	0.015746	0.080166	0.042278	0.04475	0.069586	0.007146	0.007074	0.000126	0.021805	0.002892	0.015708	0.005756	0.005346	-0.001258	0.036577	0.015202	0.002476	0.012419	INVALID	0.003429	0.009705	0.017383	0.009629	0.013855	0.008179	INVALID	0.004854	0.003327	INVALID	0.005921	-0.008302	0.005444	0.007839	0.005669	-0.000131	0.001913	0.00445	INVALID	0.003027
A	ArrayStrip	meat juice	59	ELISA pretested	0.033797	0.02613	0.027772	0.019497	0.037811	0.011949	0.019633	0.059617	0.06473	0.086584	0.060505	0.001445	0.002637	0.018925	0.000555	0.002249	0.003295	-0.001335	0.002449	-0.000165	0.008086	0.00274	0.003876	0.002618	0.006605	0.00249	0.008192	0.017616	0.00953	0.006451	0.009384	0.031497	0.001339	0.005217	0.052509	0.059037	2e-05	0.005316	0.001789	0.009286	0.00344	6.5e-05	0.00411	0.001731	0.005814
A	ArrayStrip	meat juice	60	ELISA pretested	0.00225	0.000483	0.027432	0.016447	0.10083	INVALID	0.018065	0.060746	INVALID	INVALID	INVALID	INVALID	-0.001677	0.001108	INVALID	0.001892	INVALID	0.039893	0.013903	0.003624	0.006038	0.088486	INVALID	0.007609	INVALID	0.187421	0.001975	INVALID	0.27483	INVALID	0.01459	0.112642	0.091346	0.005141	0.01249	0.011917	0.001921	INVALID	0.004394	0.009596	0.006476	0.007205	INVALID	0.021671	0.17897
A	ArrayStrip	meat juice	61	ELISA pretested	0.003924	0.036032	0.025967	0.012015	0.02034	0.012318	0.015341	0.068209	0.036754	0.035392	0.041243	0.00917	0.010521	0.007257	0.000695	0.005583	0.005791	-0.003177	0.014868	0.019398	-0.004952	0.082268	0.003532	0.009181	0.005722	0.006828	0.004771	0.008781	-0.001663	0.00975	0.003931	0.005809	0.006514	0.000638	0.00685	0.013328	0.00246	0.002738	0.001754	0.006105	0.007106	0.007595	0.00211	0.002374	0.033062
A	ArrayStrip	meat juice	62	ELISA pretested	0.042304	0.036334	0.029527	0.039729	0.038161	0.041865	0.033011	0.087817	0.063589	0.059899	0.085475	0.009326	0.004071	0.005968	0.006231	0.00354	0.001389	0.004079	-0.005411	0.010725	0.000915	0.006342	0.021654	0.026835	0.012309	0.009562	0.011211	0.010844	0.020077	0.004571	0.0131	0.073647	0.006185	0.00955	0.005444	-0.000552	0.005255	0.019124	0.001488	0.015149	0.024308	0.001552	0.004857	-0.000634	0.005171
A	ArrayStrip	meat juice	63	ELISA pretested	0.031674	0.018938	0.035397	0.022713	0.0235	0.024087	0.00617	0.080818	0.091574	0.06391	0.074687	0.00044	0.002145	0.024839	0.002548	-0.002319	0.00468	0.004994	0.002049	-0.004012	0.002221	INVALID	0.005399	0.001597	-0.000456	0.006698	0.006332	0.008061	0.003074	0.015373	0.004796	0.001126	0.004083	0.009144	0.009534	0.012412	-0.001811	0.004309	-0.000921	0.004299	-0.001324	0.003671	0.01143	0.003352	0.00134
A	ArrayStrip	meat juice	64	ELISA pretested	0.035607	0.027832	0.023272	0.043341	0.027305	0.034404	0.03405	0.078729	0.05552	0.048678	0.102805	0.016747	0.013005	0.001913	0.022939	INVALID	0.028742	0.002144	-0.000343	-0.001293	-0.002953	0.002113	0.022351	0.002383	-1e-05	0.004333	0.002448	0.006491	0.009521	0.00087	0.009101	0.002143	0.001646	INVALID	0.003611	0.001501	0.0006	0.010379	0.002416	-0.00099	0.005053	0.005536	0.018993	0.0194	0.003632
A	ArrayStrip	meat juice	65	ELISA pretested	0.080747	INVALID	0.062279	0.0596	0.07509	0.073103	0.047283	0.166417	0.208926	0.138825	0.19031	0.005185	0.038573	0.005714	0.03917	-0.000715	0.012629	0.004943	0.011288	0.003845	0.031137	0.008361	0.005821	-0.00015	0.02483	0.160785	INVALID	0.030614	0.028522	0.03219	0.026076	0.022005	0.003738	0.0494	0.001441	5.4e-05	0.001387	0.002989	0.01429	0.005213	0.002981	0.002255	-0.000166	0.007462	0.014903
A	ArrayStrip	meat juice	66	ELISA pretested	0.012381	0.015119	0.009177	0.03236	0.019821	0.01593	0.015718	0.055245	0.07343	0.026465	0.064851	0.002556	0.005685	0.00054	0.001925	0.006427	0.000788	0.003322	0.003094	0.006281	0.002928	0.005033	0.003655	0.003691	0.004932	0.003498	0.000615	0.007508	0.009533	0.004994	0.075644	0.001088	0.001373	-0.000654	4.2e-05	0.002408	0.000246	0.002552	0.003586	0.001907	0.004567	0.00145	0.002871	0.001646	0.003821
A	ArrayStrip	meat juice	67	ELISA pretested	0.030982	0.09134	0.052358	0.1171	0.080651	0.104582	0.09441	0.125736	0.106124	0.102229	0.089655	0.001361	0.00096	0.001962	0.00616	0.003827	0.002699	0.005206	0.008389	-0.003418	0.006789	0.005187	INVALID	0.001464	0.008862	0.003996	0.016431	0.013351	0.012658	0.015773	0.007997	0.004766	0.00599	0.009766	0.000496	0.002602	0.002671	0.00543	0.000952	0.001944	0.006069	0.041698	INVALID	0.002176	0.00796
A	ArrayStrip	meat juice	68	ELISA pretested	0.038581	0.05471	0.055964	0.061209	0.02942	0.06129	0.044775	0.14728	0.138203	0.09616	0.11702	0.010556	0.005246	0.006691	0.001587	0.013436	0.001552	0.001752	0.016017	0.003638	INVALID	0.008862	0.001579	0.000886	INVALID	0.005356	0.001447	0.012764	0.008563	0.019031	0.027392	0.002932	0.004283	0.007831	INVALID	0.0082	0.007568	0.003711	0.013916	0.007544	0.011585	0.003788	0.001454	0.014706	0.012799
A	ArrayStrip	meat juice	69	ELISA pretested	0.012114	0.013894	0.01645	0.014428	0.032585	0.014394	0.015657	0.049248	0.035075	0.030334	0.032918	0.008575	0.004009	0.032761	0.010013	0.007504	0.00052	0.006881	0.005027	0.023363	0.012042	0.003869	INVALID	0.011698	0.003706	0.011013	0.009176	0.006925	0.001902	0.005293	0.007045	0.000514	0.006034	0.010723	0.006695	0.001764	0.005836	0.004111	0.008857	0.005698	0.006436	0.003136	0.002739	0.008089	0.000848
A	ArrayStrip	meat juice	70	ELISA pretested	0.015211	0.018845	0.011371	0.008397	0.023717	0.004376	0.005903	0.027011	0.036294	0.029083	0.042969	0.005175	0.01244	0.00057	0.002386	0.001612	0.009852	0.002624	0.021007	0.023231	0.000493	0.007563	7.4e-05	0.000153	INVALID	0.000643	0.001386	0.006721	0.011059	0.007416	0.007524	-0.000971	0.004889	0.003624	0.003784	0.003127	0.002207	-0.000492	0.002835	0.026338	0.00165	0.001004	0.001576	0.001154	0.002143
A	ArrayStrip	meat juice	71	ELISA pretested	INVALID	0.01754	0.021511	0.023334	0.012338	0.005283	0.009826	0.045814	0.024323	0.048614	0.057846	0.001446	0.000871	0.00478	0.00353	0.012069	0.001174	0.002495	0.001073	0.003805	0.009053	0.006036	0.001714	0.002455	0.002605	0.003845	0.004028	-0.002606	0.035949	0.006898	0.005479	0.007003	0.003059	0.00336	0.001223	0.000799	0.009063	0.004139	0.009685	0.001827	0.001543	0.002989	0.006586	0.000831	0.001432
A	ArrayStrip	meat juice	72	ELISA pretested	0.020064	0.00695	0.02677	INVALID	0.005365	0.006046	0.011133	0.054255	0.026558	0.046672	0.049109	-0.000867	0.002295	0.002591	0.008244	-0.003102	0.002558	0.006804	0.002169	0.00225	0.003198	0.001608	0.016919	-0.001387	0.002262	0.016239	0.004122	INVALID	0.003143	0.006823	0.005838	0.001597	0.00734	-0.000921	0.008182	0.001859	0.000783	0.006654	0.003887	0.033576	0.003906	0.002446	0.004711	0.001142	-0.002226
A	ArrayStrip	meat juice	74	ELISA pretested	0.06851	0.04843	0.044951	0.053574	0.047216	0.020953	0.021219	0.112549	0.083835	0.078739	0.086057	0.004255	0.001597	0.001526	0.042406	0.004138	0.000777	-0.000986	0.005817	0.001166	0.005388	0.020128	0.004146	-0.000789	0.000981	0.001282	0.007707	0.008116	0.02738	0.009261	0.019391	0.005873	0.002164	0.002191	0.005738	0.004752	0.0019	0.026724	0.00481	0.00212	0.002974	0.002556	0.004406	0.00309	0.000282
A	ArrayStrip	meat juice	75	ELISA pretested	0.025097	0.033804	0.036378	0.045676	0.023586	0.040138	0.028301	0.052766	0.057179	0.06193	0.08798	0.003143	-0.00022	0.005103	0.000248	0.006323	0.003996	0.014657	0.004952	0.001618	0.00322	0.00654	0.007981	0.009289	0.025724	0.008834	-0.000754	INVALID	0.017497	0.022764	0.025009	0.00356	0.007501	0.004896	0.003994	0.006239	0.003987	0.006271	0.007489	0.001102	0.005244	0.00481	0.002405	-0.001032	-0.002443
A	ArrayStrip	meat juice	76	ELISA pretested	0.026779	0.020992	0.023316	0.016109	0.054873	0.015706	0.016316	0.069109	0.057706	0.07472	0.077955	0.008428	0.000147	0.006948	0.001506	0.002862	0.00499	0.005814	INVALID	0.013786	INVALID	0.00708	0.001466	0.014474	0.004639	INVALID	0.005849	0.015372	0.003761	0.016799	0.017856	0.005012	0.010057	0.011662	0.009336	0.003077	0.000825	0.003556	0.007553	0.000497	0.007024	0.003541	0.008832	0.000129	0.002183
A	ArrayStrip	meat juice	77	ELISA pretested	0.013139	0.015112	0.016287	0.023707	0.004914	0.012933	0.006682	0.020272	0.033614	0.027244	0.043488	0.001407	0.003417	0.009341	0.002933	0.002229	0.00674	0.008836	0.004384	0.000179	0.004368	0.004652	0.007898	0.001901	0.001522	0.001658	0.006187	0.007989	0.011243	0.017882	0.008095	0.066518	0.002463	0.002118	0.005158	0.003196	0.004645	0.017655	0.004556	0.007128	0.010705	INVALID	0.005549	0.001311	0.004216
A	ArrayStrip	meat juice	78	ELISA pretested	0.012976	0.006174	0.012728	0.006302	0.052989	0.022425	0.007156	0.035333	0.03237	0.035965	0.02785	-0.003982	0.00678	INVALID	0.016365	0.003249	0.00276	0.000843	-0.00068	0.004255	0.010833	0.007578	0.005715	0.002885	0.007191	0.015304	0.011282	0.006364	0.013217	0.018443	0.003299	0.000554	0.005181	0.003008	0.001056	0.007384	0.002552	0.014651	0.00815	0.014595	0.00102	0.013151	-0.005111	0.001595	0.002148
A	ArrayStrip	meat juice	79	ELISA pretested	0.020683	0.018474	0.037853	-0.007914	0.021792	0.023925	0.023674	0.073588	0.043876	0.043187	0.046308	0.007828	-0.003894	0.002835	0.010333	0.002241	0.005917	0.005468	0.019392	0.00792	0.003826	0.003476	0.078197	-0.000204	0.002437	0.00588	-0.000273	0.00759	0.00923	0.001921	0.006278	0.00063	0.0108	0.007316	0.002099	0.003271	0.003242	0.004642	0.04055	0.000639	0.002234	0.002722	0.001077	0.003408	0.003082
A	ArrayStrip	meat juice	80	ELISA pretested	0.014367	0.024088	0.011359	0.013597	0.017915	0.02838	0.0086	0.021827	0.026203	0.017977	0.037381	0.002315	0.000334	0.004878	0.001936	0.000597	0.004027	0.007569	0.005955	0.003122	0.004712	0.008039	0.003897	0.008289	-0.001469	0.017057	0.009696	0.004582	0.008438	0.005562	0.001899	-0.001226	0.002568	0.001988	0.003732	0.028726	0.003725	0.013026	0.00513	0.008967	INVALID	0.010206	-0.000162	-0.001274	0.004838
A	ArrayStrip	meat juice	81	ELISA pretested	0.073642	0.104486	0.046676	0.050368	0.044775	0.033437	0.047953	0.136367	0.150881	0.110339	0.223326	0.006746	0.011043	0.007611	0.002777	0.004987	-0.000243	0.000212	0.017818	-0.000958	0.004322	0.015558	0.005786	0.011345	0.004584	0.022546	0.037392	0.010463	0.033072	0.026805	0.017311	0.01022	0.004237	0.012202	0.030177	0.018468	0.016195	0.02432	0.027489	0.009279	0.01668	0.008534	0.01636	0.01386	0.017108
A	ArrayStrip	meat juice	82	ELISA pretested	0.09502	0.065064	0.030487	0.027762	0.084747	0.052612	0.012176	0.141006	0.160967	0.070693	0.159812	0.004916	0.000473	0.011429	INVALID	0.003238	0.005064	0.017635	0.058319	0.018452	0.030049	-0.001042	0.006201	0.007666	0.006848	0.082843	0.02412	0.015002	0.010314	INVALID	0.010413	0.014616	0.01363	0.004448	0.00141	-0.001189	0.002502	0.015937	0.09341	-0.000501	-0.000235	0.002877	0.001946	0.002366	-0.009895
A	ArrayStrip	meat juice	83	ELISA pretested	0.087013	INVALID	0.031671	0.015018	0.02267	0.007225	0.04283	-0.000549	0.109123	0.070792	0.144363	3.6e-05	0.002691	0.00314	0.014934	0.024847	0.006009	0.007492	0.004942	INVALID	0.025862	INVALID	INVALID	0.002752	-0.001103	0.09518	0.017033	0.011918	0.013466	-0.000437	INVALID	0.001036	0.023905	0.018491	0.055355	INVALID	0.021322	0.025433	0.007866	INVALID	0.024037	0.005921	0.010627	INVALID	0.0047
A	ArrayStrip	meat juice	84	ELISA pretested	0.019509	0.009096	0.017202	0.022217	0.012724	0.026267	0.028872	0.030767	0.057884	0.033626	0.0649	INVALID	0.003287	0.02	0.000278	0.003	0.008634	0.00279	0.005182	0.009639	0.003007	0.010102	0.012141	INVALID	0.006437	0.001803	0.007987	0.001508	0.008808	0.025923	0.006437	0.021296	0.009051	0.001408	0.004809	INVALID	0.003153	0.00659	0.002036	0.00724	0.001302	0.008107	0.005286	0.021756	0.00288
A	ArrayStrip	meat juice	85	ELISA pretested	0.024059	0.010994	0.030589	INVALID	0.031521	0.019367	0.028932	0.051876	0.097812	0.073215	0.084429	0.003814	-0.002389	0.000336	-0.00324	0.003015	-0.001235	0.030623	0.003845	0.002176	0.002375	0.006676	0.00371	0.003014	0.002674	0.001967	0.002873	-0.002094	0.013616	0.009953	0.059548	0.032476	0.001728	0.00253	0.028662	0.002683	0.00123	0.002199	0.002393	0.003215	-0.000624	-0.00272	0.000416	0.000746	0.010342
A	ArrayStrip	meat juice	86	ELISA pretested	0.089344	0.084095	0.063273	0.097557	0.064997	0.05289	0.053213	0.169813	0.130802	0.135787	0.116053	INVALID	0.004213	0.014424	0.010558	0.002804	0.004537	-0.00039	0.001955	0.012622	0.00556	0.008902	0.000658	0.061497	0.003142	0.000828	0.000736	0.01348	0.010748	0.029601	0.008956	0.010814	0.005734	0.003117	0.004875	0.000615	0.019079	0.000607	0.00267	0.016745	-0.00083	0.001851	0.006192	-0.006485	0.003525
A	ArrayStrip	meat juice	87	ELISA pretested	0.084245	0.083154	0.08265	0.141684	0.117257	0.061084	0.072676	0.18057	0.200058	0.198915	0.190789	0.019362	0.005855	0.003135	0.016323	INVALID	0.00025	0.001953	0.012003	0.011288	0.000363	0.006787	0.009853	0.001867	0.002887	0.014809	0.012965	0.009178	0.011012	0.001835	0.025591	0.026036	-0.000271	0.006062	0.020525	INVALID	0.010042	0.009464	0.003391	0.01137	-0.001431	0.007863	0.005839	0.011325	0.004652
A	ArrayStrip	meat juice	88	ELISA pretested	0.094816	0.065638	0.069978	0.095791	0.07541	0.085348	0.06363	0.128578	0.119095	0.150033	0.136879	0.01011	0.004506	0.005476	0.058218	0.004091	0.004121	8.8e-05	0.005223	0.00109	0.00108	0.006604	0.003708	0.012952	0.000814	0.082741	0.006246	0.012765	0.004695	0.011466	0.009064	0.003438	0.005408	INVALID	0.001349	0.001696	0.002363	INVALID	0.007549	0.004273	0.003263	0.003224	0.005393	0.004996	0.00176
A	ArrayStrip	meat juice	89	ELISA pretested	0.094408	0.10373	0.103168	0.08572	0.08678	0.055214	0.071461	0.235874	0.215949	0.232359	0.233566	0.018149	0.013772	0.01861	0.013868	0.017494	0.015383	0.013584	0.054357	0.046775	0.013146	0.016485	0.012738	0.014727	0.015163	0.014873	0.043265	0.029909	0.027413	0.020243	0.03796	0.022129	0.007623	0.007978	0.032205	0.012763	0.004396	0.00553	0.002532	0.016073	INVALID	0.014872	0.012323	0.013573	0.006554
A	ArrayStrip	meat juice	90	ELISA pretested	0.097352	0.091145	0.108043	0.146435	0.093779	0.121441	0.088335	0.224656	0.206331	0.209451	0.189864	0.001296	0.027693	0.002476	0.018201	0.010227	0.000783	0.001183	0.009845	-0.002518	0.008126	0.004302	0.011781	0.001952	0.003585	0.002657	0.018563	0.016258	0.0102	0.011039	0.015888	0.009049	0.012206	0.001897	0.011282	0.002111	0.009165	0.010136	0.002103	0.00049	0.009956	0.003352	0.002345	0.000421	0.00254
A	ArrayStrip	meat juice	100	T. gondii positive	0.066458	0.213592	0.189934	0.006136	INVALID	INVALID	0.063445	0.125664	0.022508	0.005216	0.054903	0.040993	INVALID	0.033426	0.03667	0.010777	0.017739	0.009945	0.005112	INVALID	0.02037	0.007244	0.006826	0.000151	0.043872	0.077035	0.003897	INVALID	INVALID	0.0191	0.005514	0.058329	0.013084	INVALID	0.004997	INVALID	INVALID	0.006656	0.000483	0.009111	0.007343	0.016806	INVALID	0.069475	0.01776
A	ArrayStrip	meat juice	101	T. gondii positive	0.018609	0.004736	0.034874	0.024203	INVALID	INVALID	0.000976	0.01133	0.006479	0.055391	0.063075	0.033661	-0.003363	INVALID	0.014665	0.022841	INVALID	0.005469	INVALID	0.029746	0.007211	0.003135	INVALID	0.048234	0.064182	INVALID	-0.000528	0.294891	0.328349	INVALID	0.000683	0.046055	INVALID	-0.004938	INVALID	0.007321	0.049906	0.038774	0.016165	INVALID	0.01436	-0.002956	INVALID	0.114333	0.019882
A	ArrayStrip	meat juice	102	T. gondii positive	INVALID	INVALID	INVALID	0.086895	0.027663	INVALID	0.035478	0.039478	0.057068	0.008139	0.031048	0.038142	0.003924	0.031869	0.023084	INVALID	INVALID	0.002584	0.015481	INVALID	0.125004	-0.004192	0.072935	0.0748	0.230968	0.078322	INVALID	0.289502	INVALID	0.026923	INVALID	0.015686	0.023574	0.057998	INVALID	INVALID	INVALID	0.007945	0.001629	0.070046	0.018324	INVALID	0.026243	INVALID	0.003542
A	ArrayStrip	meat juice	103	T. gondii positive	0.007425	INVALID	0.044859	0.393483	INVALID	INVALID	0.003626	0.270058	INVALID	0.044981	0.410704	0.006679	INVALID	INVALID	0.060201	0.177869	INVALID	0.040109	0.003728	INVALID	0.104551	0.039955	INVALID	0.266238	0.235286	INVALID	INVALID	INVALID	0.164964	0.021873	0.021803	INVALID	0.33546	0.163136	0.011453	INVALID	0.018669	0.283236	INVALID	INVALID	0.055274	INVALID	INVALID	INVALID	INVALID
A	ArrayStrip	meat juice	104	T. gondii positive	0.059044	0.070094	0.037553	0.290672	INVALID	0.004897	0.226609	INVALID	INVALID	0.03628	0.037387	0.024775	INVALID	0.163493	0.046274	0.063137	INVALID	0.072115	INVALID	0.040887	-0.003764	INVALID	INVALID	0.297256	0.512142	0.64305	0.459478	0.04027	INVALID	0.206906	0.016258	0.722805	0.473743	0.634298	-0.004295	0.027653	INVALID	INVALID	0.019001	INVALID	0.43197	INVALID	0.364363	0.029384	0.093957
A	ArrayStrip	meat juice	105	T. gondii positive	0.484329	0.004136	0.45756	INVALID	0.001444	INVALID	0.584869	0.029498	0.186322	INVALID	0.001397	INVALID	0.000579	0.012669	0.007947	INVALID	-0.001373	0.021077	0.061127	0.036979	INVALID	0.00581	0.039584	INVALID	0.056872	0.406511	INVALID	-0.001972	INVALID	0.206222	0.072861	0.047871	INVALID	0.007279	INVALID	-0.001966	INVALID	0.105019	0.057884	0.001656	-0.000677	0.013856	INVALID	INVALID	INVALID
A	ArrayStrip	meat juice	106	T. gondii positive	0.008133	0.017487	0.001181	0.005963	0.00472	0.048737	0.003533	0.019047	0.009353	0.017237	0.015368	0.096508	0.006475	0.001614	9.9e-05	0.060049	0.003364	0.006849	0.031316	INVALID	0.013875	0.003291	0.003812	0.005755	0.011165	0.000389	0.007384	0.006726	INVALID	-0.002216	0.004356	0.027412	0.004078	INVALID	0.002973	-0.006537	INVALID	INVALID	0.000145	0.013114	0.001886	-0.000316	INVALID	-0.012912	0.002247
A	ArrayStrip	buffer	buffer	buffer	0.000841	0.000245	0.00035	0.002253	0.001347	0.000901	0.000113	0.003065	-0.000645	-0.00078	-0.000254	0.001251	0.001935	0.001162	0.001999	0.002131	0.000661	0.00071	-0.000228	0.001301	0.001384	0.002278	8.5e-05	0.003833	0.015832	0.002914	0.003199	-0.001398	0.003635	0.001941	0.023198	0.004416	0.004895	0.003919	0.027489	0.002484	0.008424	0.001061	0.020493	7e-06	-5.9e-05	0.002169	0.000411	0.004237	-0.000307
A	ArrayStrip	serum	1	ELISA pretested	0.041117	0.0414	0.053126	0.039477	0.052732	0.037972	0.063268	0.085501	0.080295	0.059348	0.054788	-0.001489	0.009485	0.003541	0.014293	0.031797	0.009403	0.012867	0.009506	0.017244	0.018578	0.021476	0.010533	0.011735	0.022344	0.020774	INVALID	0.022489	0.026745	0.022064	0.022138	0.004607	0.00728	0.007032	0.078721	0.014564	0.012537	0.018298	0.010914	0.013413	0.004928	0.031912	0.009918	0.022367	0.017538
A	ArrayStrip	serum	2	ELISA pretested	0.108398	0.078818	0.095304	0.070338	0.070029	0.092474	0.07207	0.162765	0.140706	0.183619	0.166593	0.117635	0.099079	0.024141	0.027882	0.02446	0.01741	0.018268	0.020036	0.042008	0.010009	0.02679	0.035706	0.015724	0.015395	0.012207	0.002131	0.018084	0.031186	0.022003	0.015534	0.009603	0.013995	0.010278	0.006216	0.026574	0.016761	0.021763	0.029329	0.015542	0.064437	0.009991	0.017569	0.025593	0.018581
A	ArrayStrip	serum	3	ELISA pretested	0.073397	0.082029	0.093742	0.06332	0.061227	0.071313	0.072689	0.113198	0.135177	0.086496	0.121481	0.028847	0.024882	0.027666	0.028571	0.032187	0.023083	0.03794	0.02916	0.034929	0.020458	0.028412	0.023836	0.028214	0.017021	0.030385	0.020132	0.04156	0.071501	0.051023	0.04102	0.022211	0.045654	0.026646	0.027163	0.027151	0.026955	0.020633	0.036441	0.022664	0.022925	0.014747	0.032411	0.029051	0.025201
A	ArrayStrip	serum	4	ELISA pretested	0.050166	0.051578	0.058623	0.038502	0.027498	0.035868	0.029411	0.057815	0.077839	0.071737	0.071803	0.026492	0.036814	0.04624	0.036741	0.038422	0.051356	0.022701	0.024063	0.043452	0.029459	0.037269	0.030152	0.033968	0.023134	0.036346	0.022549	0.045061	0.041391	0.026007	0.015421	0.06552	0.060524	0.048703	0.016467	0.025875	0.058684	0.038293	0.035931	0.043634	0.025748	0.018912	0.033824	0.040906	0.037248
A	ArrayStrip	serum	5	ELISA pretested	0.003323	0.057539	0.045759	0.046125	0.042992	0.095018	0.039778	0.120651	0.104564	0.079008	0.086029	0.028802	0.029249	0.019075	0.023963	0.034285	0.019812	0.021209	0.021725	0.02656	0.017097	0.02572	0.016333	0.023038	0.007132	0.012987	0.021961	0.025757	0.030677	0.018044	0.018756	0.018581	0.023872	0.01432	0.021132	0.021712	0.026979	0.018586	0.028174	0.026134	0.022844	0.017299	0.022139	0.027204	0.02507
A	ArrayStrip	serum	6	ELISA pretested	0.067691	0.068864	0.072227	0.058137	0.055922	0.054865	0.065546	0.090798	0.101384	0.078591	0.093426	0.072167	0.064207	0.05149	0.054447	0.065252	0.035345	0.038856	0.050947	0.06049	0.093049	0.041453	0.049145	0.05908	0.046785	0.044643	0.039214	0.059062	0.096154	0.075524	0.038502	0.033865	0.061552	0.036719	0.041579	0.054952	0.055205	0.038102	0.070172	0.05448	0.040274	0.048196	0.046094	0.049632	0.051598
A	ArrayStrip	serum	7	ELISA pretested	0.04483	0.044312	0.040855	0.039249	0.043313	0.040263	0.032207	0.080861	0.096951	0.078667	0.0746	0.017851	0.0275	0.018726	0.012033	0.008226	0.014002	0.013474	0.013488	0.010876	0.017694	0.008085	0.011991	0.023359	0.009998	0.013546	0.009175	0.017552	0.042819	0.019638	0.014055	0.010392	0.02098	0.010961	0.011527	0.01406	0.014791	0.011953	0.014928	0.016305	0.010087	0.015547	0.014024	0.018571	0.022026
A	ArrayStrip	serum	8	ELISA pretested	0.048382	0.072543	0.061675	0.036769	0.037952	0.038564	0.036775	0.069679	0.07075	0.05113	0.062967	0.06098	0.053512	0.032009	0.055626	0.0477	0.034553	0.02375	0.037841	0.044195	0.02855	0.029176	0.047355	0.035664	0.032682	0.037144	0.021006	0.06508	0.066145	0.02685	0.061177	0.033031	0.035223	0.028951	0.029659	0.037236	0.040271	0.035032	0.040682	0.048901	0.046614	0.023904	0.044848	0.033294	0.027826
A	ArrayStrip	serum	9	ELISA pretested	0.046447	0.044418	0.053589	0.033021	0.030428	0.026586	0.037939	0.035436	0.064841	0.03397	0.081631	0.039351	0.027579	0.031582	0.040203	0.063355	0.027378	0.021258	0.035394	0.060602	0.031109	0.037361	0.025956	0.051998	0.044026	0.036935	0.035052	0.045257	0.048999	0.054156	0.034612	0.025849	0.035293	0.02645	0.020897	0.083031	0.052135	0.039484	0.059487	0.044966	0.036588	0.031809	0.055952	0.044386	0.041978
A	ArrayStrip	serum	10	ELISA pretested	0.024471	0.036213	0.032037	0.021494	-0.001574	0.003753	0.020855	0.042807	0.03698	0.044344	0.031557	0.030644	0.025169	0.022685	0.022258	0.018751	0.012653	0.01726	0.007196	0.023262	0.016946	0.011722	0.019258	0.023266	0.010747	0.015687	0.018314	0.019626	0.037247	0.026971	0.025262	0.023519	0.009964	0.026204	0.007291	0.028523	0.023862	0.033039	0.024841	0.022742	0.014989	0.014883	0.024561	0.018582	0.013873
A	ArrayStrip	serum	11	ELISA pretested	0.050426	0.043401	0.067395	0.038755	0.043844	0.020018	0.034821	INVALID	0.087897	0.052429	0.055713	0.045545	0.035935	0.033716	0.050805	0.032176	0.032722	0.028811	0.03841	0.02929	0.030142	0.031731	0.027947	0.021347	0.022223	0.028897	0.017347	0.038683	0.04085	0.036649	0.026727	0.022366	0.029233	0.027405	0.020621	0.043021	0.032141	0.032449	0.040824	0.02812	0.024627	0.01185	0.034034	0.033816	0.037459
A	ArrayStrip	serum	12	ELISA pretested	0.037628	0.034451	0.040402	0.033592	0.026692	0.017299	0.02696	0.051605	0.055474	0.068362	0.049647	0.032103	0.034992	0.031541	0.024282	0.030714	0.033849	0.015354	0.027121	0.030448	0.020286	0.018574	0.040657	0.027828	0.029645	0.02365	0.019535	0.035893	0.045603	0.034073	0.031209	0.029551	0.024975	0.022137	0.013013	0.038819	0.037943	0.02474	0.033722	0.030869	0.021482	0.013913	0.022864	0.037506	0.03254
A	ArrayStrip	serum	13	ELISA pretested	0.017959	0.014885	0.028212	0.011211	0.015316	0.007392	0.013218	0.025622	0.03381	0.031858	0.032869	0.081367	0.009445	0.013156	0.008248	0.002322	0.00783	0.008589	0.02832	0.006091	0.008057	0.00826	0.004546	0.010741	0.004175	0.009002	0.005682	0.03424	0.030636	0.010491	0.008925	0.009307	0.01079	0.007731	0.006391	0.008984	0.01349	0.008481	0.014344	0.010926	0.01004	0.025298	0.011308	0.012404	0.013874
A	ArrayStrip	serum	14	ELISA pretested	0.062125	0.074498	0.089632	0.070326	0.057662	0.042571	0.071073	0.143727	0.085533	0.092069	0.121517	0.039859	0.033351	0.044108	0.033385	0.039191	0.027565	0.017999	0.032241	0.04301	0.030001	0.023688	0.02179	0.031594	0.027844	0.029439	0.02077	0.039247	0.053181	0.027668	0.028054	0.024759	0.033022	0.019885	0.032599	0.041826	0.024534	0.017608	0.041941	0.019131	0.024304	0.018348	0.027218	0.039455	0.025905
A	ArrayStrip	serum	15	ELISA pretested	0.109567	0.122332	0.136044	0.127729	0.109271	0.117046	0.07717	0.275768	0.271685	0.201014	0.252361	0.023465	0.016873	0.016331	0.025426	0.022142	0.015548	0.011217	0.023448	0.024367	0.016269	0.013089	0.017735	0.020776	0.028304	0.024018	0.013106	0.032057	0.056075	0.043249	0.031584	0.056554	0.019583	0.026645	0.022179	0.018228	0.016065	0.010878	0.02504	0.011499	0.013022	0.010482	0.020518	0.02313	0.012996
A	ArrayStrip	serum	16	ELISA pretested	0.076755	0.077136	INVALID	0.065997	0.071618	0.04573	INVALID	0.167071	0.141677	0.158567	0.153265	0.033162	0.028448	0.027772	0.038823	0.029649	0.021905	0.042109	0.024457	0.070932	0.02815	0.052375	0.035808	0.039552	0.044366	0.063538	0.047264	0.052907	0.056023	0.058796	0.056921	0.036396	0.059235	0.054771	0.036542	0.046016	0.043039	0.031952	0.067936	0.030499	0.032927	0.027254	0.041494	0.079597	0.030005
A	ArrayStrip	serum	17	ELISA pretested	0.049653	0.06909	0.050019	0.06606	0.046188	0.040748	0.030219	0.070051	0.082397	0.109222	0.106238	0.005383	0.006991	0.003675	0.010335	0.00672	0.019323	0.002367	0.007002	0.013397	0.010993	0.006754	0.006183	0.015093	0.019521	0.004531	0.021433	0.037358	0.058082	0.04109	0.024049	0.023524	0.028174	0.013511	0.006953	0.017037	0.011074	0.013503	0.026885	0.014248	0.008925	0.020519	0.021184	0.006224	0.009827
A	ArrayStrip	serum	18	ELISA pretested	0.003211	0.016232	-0.002026	0.012845	0.038848	0.011887	0.000665	0.019573	0.02471	0.030557	0.028723	0.001476	0.001734	0.002162	0.001456	0.00299	0.006018	0.001674	0.001187	0.001763	0.035256	0.002382	0.001183	0.00191	0.002025	0.011831	0.000397	0.00523	0.006163	0.006659	0.014312	0.003714	0.029678	0.05713	0.06184	0.003055	0.001582	0.004984	0.005397	-0.000215	0.011496	0.001777	0.008034	-0.001258	0.000298
A	ArrayStrip	serum	19	ELISA pretested	0.069703	0.06177	0.068921	0.075794	0.045169	0.04203	0.052916	0.075578	0.11025	0.059293	0.117464	0.085815	0.056888	0.038574	0.047349	0.049868	0.055559	0.026748	0.049154	0.073626	0.058813	0.019645	0.042418	0.048638	0.053639	0.048064	0.028295	0.105009	0.088004	0.07249	0.064345	0.039853	0.034345	0.027026	0.02806	0.094101	0.047719	0.042164	0.072966	0.047386	0.039859	0.015143	0.045904	0.071778	0.03557
A	ArrayStrip	serum	20	ELISA pretested	0.067406	0.061593	0.076194	0.043926	0.048345	0.039205	0.020701	0.131218	0.124998	0.157711	0.088344	0.007751	0.010628	0.001754	0.000419	0.018743	0.014851	0.005584	0.007167	0.019609	0.00891	0.010216	0.003301	0.013847	0.009213	0.010897	0.013163	0.015324	0.020581	0.011445	0.017552	0.011189	0.012456	0.00209	0.01436	0.017158	0.010233	0.009085	0.025575	0.013353	0.004834	0.005844	0.015402	0.021087	0.01336
A	ArrayStrip	serum	21	ELISA pretested	0.038233	0.039356	0.045195	0.037819	0.005724	0.046147	0.049496	0.042721	0.075029	0.067841	0.071399	0.023761	0.020967	0.011776	0.017329	0.015517	0.025153	0.010954	0.016847	0.01001	0.01662	0.012786	0.015386	0.025332	0.018151	0.019498	0.009609	0.029125	0.078579	0.025379	0.021314	0.013965	0.018874	0.005055	0.009582	0.016168	0.01959	0.015155	0.027111	0.016794	0.014603	0.011867	0.021815	0.016073	0.01437
A	ArrayStrip	serum	22	ELISA pretested	0.071988	0.066469	0.091434	0.171302	0.132646	0.120997	0.084614	0.175721	0.136812	0.115831	0.149534	0.013906	0.005515	0.010431	0.013041	0.010471	0.010617	0.009017	0.008771	0.016665	0.016453	0.03358	0.001039	0.004465	0.005788	0.062679	0.013187	0.048482	0.048104	0.034983	0.036653	0.00837	0.012376	0.013718	0.006077	0.013223	0.009573	0.008032	0.012511	0.006468	0.007657	0.002279	0.006689	0.015142	0.011684
A	ArrayStrip	serum	23	ELISA pretested	0.071842	0.061078	0.077867	0.086009	0.096625	0.094068	0.081168	0.176801	0.149872	0.167027	0.148827	0.022651	0.009431	0.024376	0.022455	0.012861	0.010409	0.018135	0.012425	0.062465	0.014383	0.007699	0.005979	0.015889	0.025228	0.027547	0.011412	0.033053	0.034406	0.021603	0.022483	0.06781	0.023566	0.012048	-0.001739	0.023204	0.015557	0.012914	0.017221	0.019661	0.010244	0.002643	0.026422	0.018239	0.017462
A	ArrayStrip	serum	24	ELISA pretested	0.011213	0.003009	0.015621	0.021757	0.015408	0.007932	0.009494	0.016612	0.02846	0.072323	0.020302	0.012081	0.001904	0.008225	0.010479	0.014144	0.01774	0.009485	0.011966	0.001351	0.007723	0.014684	0.001565	0.019822	0.014388	0.01502	0.003993	0.019416	0.030445	0.023815	0.019423	0.007091	0.019331	0.026194	0.011094	0.015579	0.013725	0.013604	0.018336	0.01312	0.001602	0.008453	0.018316	0.01847	0.014981
A	ArrayStrip	serum	25	ELISA pretested	0.052465	0.055484	0.057082	0.036922	0.031207	0.025484	0.031882	0.08452	0.105782	0.057457	0.084043	0.028771	0.023931	0.022822	0.023137	0.032209	0.015201	0.016871	0.020095	0.025686	0.020376	0.023482	0.01327	0.019342	0.024245	0.025158	0.019607	0.027628	0.030657	0.025277	0.021998	0.018241	0.020649	0.019622	0.008384	0.02009	0.026375	0.017619	0.026925	0.021379	0.01605	0.01391	0.028289	0.029694	0.027607
A	ArrayStrip	serum	26	ELISA pretested	0.071677	0.057642	0.0676	0.075762	0.050845	0.053914	0.058442	0.124539	0.123694	0.100259	0.097729	0.046383	0.034326	0.028911	0.033311	0.027285	0.028005	0.027685	0.028265	0.031098	0.031713	0.028981	0.027356	0.042566	0.11715	0.033697	0.029288	0.055723	0.064733	0.045163	0.041825	0.020967	0.033959	0.014037	0.025611	0.042484	0.029755	0.031474	0.035782	0.036583	0.025972	0.020096	0.029227	0.042192	0.030404
A	ArrayStrip	serum	27	ELISA pretested	0.108946	0.134378	0.110368	0.115631	0.115809	0.070594	0.103797	0.179538	0.16852	0.152095	0.178147	0.131964	0.077891	0.088601	0.090941	0.089876	0.070615	0.085957	0.070878	0.108554	0.089528	0.069209	0.080663	0.090138	0.111811	0.089723	0.082754	0.075941	0.097075	0.070639	0.083476	0.062481	0.088924	0.063801	0.096223	0.096382	0.083558	0.071089	0.111843	INVALID	0.062159	0.07992	0.106445	0.110813	0.09958
A	ArrayStrip	serum	28	ELISA pretested	0.004834	0.002239	0.004578	0.003159	0.00135	0.010601	0.000738	0.009184	-0.000485	0.027041	0.008956	0.001149	0.000876	0.001503	0.002445	0.005633	0.002281	0.002052	0.00323	0.002939	0.001946	0.000138	4e-05	0.007071	0.005887	0.00106	0.002536	0.000938	0.001789	0.00234	0.002769	0.003084	0.002475	0.001586	-0.0001	0.004601	0.004418	-0.000351	0.001144	0.001977	0.001275	0.001242	0.002129	0.002217	0.000233
A	ArrayStrip	serum	29	ELISA pretested	0.053656	0.048067	0.039628	0.047752	0.049888	0.062648	0.0419	0.060527	0.082163	0.049301	0.090969	0.038641	0.042896	0.049306	0.051301	0.043957	0.029031	0.04865	0.033329	0.03865	0.042517	0.041476	0.035851	0.040255	0.034034	0.036123	0.06033	0.05328	0.065763	0.042047	0.04344	0.041367	0.050314	0.034683	0.047863	0.03816	0.04252	0.039915	0.054172	0.050051	0.036947	0.033355	0.039671	0.036082	0.046397
A	ArrayStrip	serum	30	ELISA pretested	0.015517	0.012668	0.009015	0.010426	0.00455	0.009307	0.008716	0.031511	0.037264	0.033351	0.026694	0.006099	0.01183	0.003651	0.005694	0.003939	0.004485	0.004843	0.002249	0.004008	0.002144	0.00147	0.002901	0.00995	0.006038	0.002873	0.003343	0.010168	0.008947	0.002801	0.002485	0.014112	0.006421	0.001003	0.008483	0.005997	0.00407	0.002803	0.004521	0.003662	0.005115	0.000852	0.001684	0.010115	0.00856
A	ArrayStrip	serum	31	ELISA pretested	0.034261	0.027926	0.035202	0.031749	0.030555	0.037281	0.024782	0.043865	0.06252	0.06827	0.063383	0.009446	0.002685	0.010872	0.001368	0.002956	0.00333	0.002154	0.00624	0.007717	-0.001025	0.007426	0.004162	0.003593	0.002069	0.005104	0.004914	0.006151	0.017919	0.01678	0.010149	0.004393	-0.000311	0.001793	0.002492	0.009765	0.003442	0.002774	0.002603	0.006205	0.002331	0.005531	0.002393	0.004573	0.001658
A	ArrayStrip	serum	32	ELISA pretested	0.041658	0.037339	0.043798	0.044755	0.038681	0.035208	0.024826	0.093351	0.10709	0.086024	0.078591	0.012752	0.021382	0.00816	0.007861	0.015634	0.02318	0.018073	0.006545	0.011917	0.00876	0.003624	0.006267	0.024251	0.016995	0.008576	0.008728	0.018492	0.021726	0.014034	0.013149	0.018148	0.023751	0.009234	0.008801	0.014048	0.00462	0.003485	0.014061	0.014148	0.007621	0.006221	0.016908	0.009117	-0.003139
A	ArrayStrip	serum	33	ELISA pretested	0.046782	0.06186	0.063446	0.082947	INVALID	0.089993	0.048762	0.148381	0.132818	0.111168	0.103121	0.01895	0.009642	0.004073	0.011016	0.02627	0.032358	0.016731	0.019622	0.03481	0.007857	0.010237	0.009583	0.013829	0.013923	0.018558	0.013101	0.02687	0.023856	0.029679	0.019053	0.014235	0.010393	0.011789	0.007379	0.015351	0.013288	0.015202	0.010833	0.017169	0.007283	0.007437	0.012391	0.020206	0.010893
A	ArrayStrip	serum	34	ELISA pretested	0.033616	0.050607	0.055187	0.06025	0.063276	0.032541	0.042297	0.114656	0.089953	0.090534	0.087705	0.00753	0.001913	0.001581	0.004174	0.028189	0.001136	0.0075	0.007688	-0.002183	0.001683	0.001226	0.003077	0.010654	0.005575	0.008283	0.002909	0.023381	0.019586	0.016374	0.013815	0.001699	0.003824	0.005223	0.00898	0.010472	0.011409	0.006576	0.009756	0.004469	0.005957	0.001715	0.005919	0.010155	0.009879
A	ArrayStrip	serum	35	ELISA pretested	0.147988	0.062323	0.059888	0.061979	0.05004	0.072408	0.052262	0.088828	0.091298	0.099061	0.108947	0.002474	-0.00019	0.001095	0.003386	0.004031	0.003234	0.007068	0.005597	0.004432	-0.000124	0.002717	0.002564	0.012205	0.008615	0.00993	0.005833	0.023576	0.030073	0.022433	0.016731	0.008105	0.012718	0.012194	0.001776	0.010317	0.005362	0.009111	0.01523	0.00792	0.007699	0.003729	0.010689	0.014677	0.003594
A	ArrayStrip	serum	36	ELISA pretested	0.052577	0.053116	0.044902	0.061695	0.062671	0.057128	0.04074	0.130246	0.082096	0.15052	0.100972	0.005842	0.001686	0.003296	0.003689	0.008906	0.004318	INVALID	0.001668	0.000164	0.000921	0.002571	0.002519	0.000657	0.019346	0.004385	0.00675	0.018699	0.016026	0.021208	0.016635	0.003192	0.004677	0.001533	0.003978	0.011863	0.003152	0.022783	0.016883	0.002906	0.007737	0.00203	0.007973	0.004831	0.009107
A	ArrayStrip	serum	38	ELISA pretested	0.047243	0.045973	0.048965	0.049727	0.036071	0.018527	0.043802	0.159562	0.092399	0.132292	0.094982	0.013517	0.016219	0.005167	0.007308	0.01327	0.006644	0.008734	0.01788	0.00426	0.00526	0.024258	0.012478	0.015057	0.013576	0.011986	0.01744	0.046854	0.072154	0.038644	0.031098	0.011552	0.015205	0.016485	0.019976	0.022697	0.016295	0.03056	0.01643	0.012678	0.008343	0.006277	0.015936	0.01259	0.014017
A	ArrayStrip	serum	39	ELISA pretested	0.075358	0.076365	0.071467	0.086673	0.095704	0.070632	0.061601	0.176422	0.214554	0.142671	0.150783	0.016129	0.018102	0.018686	0.012426	0.028274	0.016715	0.013155	0.017773	0.027924	0.027411	0.025992	0.019457	0.030029	0.026421	0.035504	0.047456	0.069579	0.078468	0.08102	0.075713	0.02475	0.034996	0.039687	0.032688	0.021914	0.020473	0.026437	0.031	0.037262	0.032204	0.028714	0.07518	0.031139	0.02556
A	ArrayStrip	serum	40	ELISA pretested	0.017268	0.028718	0.034812	0.037736	0.032879	0.023147	0.027908	0.081426	0.077783	0.034244	0.062115	0.017484	0.010804	0.015692	0.009672	0.010858	0.006892	0.008076	0.010375	-0.000983	0.013011	0.020893	0.009505	0.007216	0.025001	INVALID	0.010178	0.022512	0.0359	-7.8e-05	0.019738	0.001081	0.027481	0.006116	0.004693	0.002507	0.011321	0.019396	0.007273	0.004326	0.00953	0.011538	0.004233	0.010863	0.010801
A	ArrayStrip	serum	41	ELISA pretested	0.022989	0.048595	0.035847	0.029162	0.038324	0.043264	0.037333	0.043788	0.048045	0.046784	0.059871	0.004503	0.001129	0.002283	0.001628	0.002601	0.001552	2.8e-05	6.2e-05	0.00181	0.002742	-0.001349	0.005355	0.004422	0.006495	0.000902	0.000892	0.000924	0.007	-0.000513	0.074515	-0.001431	-0.000641	0.001111	0.002073	0.004896	0.001678	0.004253	0.001366	0.003535	0.000465	0.00041	0.002012	0.004367	0.00201
A	ArrayStrip	serum	42	ELISA pretested	0.027517	0.026171	0.041944	0.005068	0.063295	0.035188	0.034561	0.056664	0.103167	0.058783	0.029969	0.07149	0.003691	0.038394	0.026203	0.082537	0.018405	0.024981	0.01025	INVALID	0.028402	0.025798	0.025252	0.026781	0.03402	INVALID	0.00859	0.005121	0.04707	0.032416	0.026769	0.003933	0.00431	0.017403	0.016305	0.049471	0.038405	0.025832	0.023811	0.015811	0.001267	0.005198	0.009784	0.069319	0.003294
A	ArrayStrip	serum	43	ELISA pretested	0.028725	0.03289	0.031851	0.054	0.044581	0.043637	0.035344	0.085099	0.134484	0.07833	0.055982	0.01685	0.017087	0.013391	0.01222	0.012439	0.005949	0.009641	0.005472	0.030323	0.010157	0.00616	0.006638	0.016014	0.005363	0.00623	0.010734	0.020083	0.022423	0.016984	0.027223	0.00416	0.029927	0.005969	0.008514	0.019723	0.014287	0.004202	0.014811	0.009952	0.005466	0.004369	0.008316	0.012383	0.01879
A	ArrayStrip	serum	44	ELISA pretested	0.039974	0.041633	0.047867	0.052888	0.043467	0.032333	0.024405	0.09303	0.096518	0.0752	0.064849	0.050019	0.013969	0.017551	0.014396	0.041553	0.044097	0.015962	0.005606	0.033142	0.029961	0.014485	0.015505	0.018772	0.020382	0.012557	0.010048	0.017226	0.027112	0.030899	0.056629	0.031975	0.019007	0.015452	0.042418	0.026271	0.017048	0.00917	0.018963	0.019055	0.00912	0.012014	0.012629	0.039439	0.015078
A	ArrayStrip	serum	45	ELISA pretested	0.00501	0.003486	0.057321	0.003333	0.004777	0.000871	0.003102	0.003406	0.022898	0.009081	0.011686	0.001487	0.00284	0.001812	0.005067	0.002793	0.002891	0.001219	0.002165	0.002888	0.001923	0.000905	0.000581	0.002507	-0.000182	0.005316	0.002495	0.004169	0.003555	0.002911	0.017294	0.004872	0.0002	0.00077	0.001459	0.002358	0.002623	0.001106	0.00576	0.003261	0.00032	0.002563	0.001431	0.0004	0.001728
A	ArrayStrip	serum	46	ELISA pretested	0.037055	0.047498	0.033195	0.045007	0.047184	0.023546	0.033527	0.106448	0.0831	0.067143	0.051081	0.055162	0.025781	0.026017	0.023644	0.040056	0.019821	0.01794	0.018471	0.024256	0.022201	0.024528	0.043363	0.019314	0.026648	0.018616	0.020935	0.031731	0.050425	0.038459	0.027612	0.021647	0.019791	0.014395	0.080652	0.029542	0.020129	0.014686	0.021621	0.031962	0.014745	0.007045	0.015656	0.048385	0.016719
A	ArrayStrip	serum	47	ELISA pretested	0.041159	0.056368	0.059059	0.042055	0.044975	0.026716	0.043204	0.134068	0.089132	0.07718	0.079157	INVALID	0.034852	0.037326	0.034734	0.043301	0.024774	0.024444	0.021386	0.02641	0.03094	0.041	0.008547	0.025482	0.034801	0.035885	0.027513	0.071715	0.095826	0.095623	0.061135	0.004892	0.029419	0.021297	0.02095	0.038661	0.030582	0.027275	0.035492	0.035265	0.016994	0.014223	0.026417	0.048354	0.024107
A	ArrayStrip	serum	48	ELISA pretested	0.045506	0.039527	0.057437	0.084611	0.061919	0.039525	0.043805	0.151676	0.123475	0.113153	0.105755	0.045613	0.028703	0.035353	0.017495	0.087269	0.027976	0.03176	0.017832	0.035038	0.000878	0.028144	0.011537	0.028967	0.016886	0.019633	0.020218	0.034984	0.022979	0.018232	0.039153	0.017498	0.016114	0.007516	0.009406	0.029733	0.012793	0.008864	0.023643	0.035126	INVALID	0.027398	0.014994	0.039956	0.002528
A	ArrayStrip	serum	49	ELISA pretested	0.034062	0.049112	0.045599	0.05004	0.047925	0.036989	0.049505	0.116103	0.107312	0.087997	0.107224	0.02344	0.01643	0.021776	0.013487	0.033589	0.011427	0.017886	0.006905	0.030445	0.009927	0.018978	0.015729	0.02842	0.01323	0.011138	0.00842	0.022963	0.023804	INVALID	0.014325	0.024286	0.02191	0.008818	0.011054	0.015493	0.028667	0.012024	0.023786	0.011334	0.030944	0.008189	0.013723	0.032044	0.023126
A	ArrayStrip	serum	50	ELISA pretested	0.123162	0.121545	0.137818	0.13253	0.118196	0.092034	0.103414	0.284812	0.159746	0.244251	0.138893	0.087309	0.06885	0.055395	INVALID	0.076813	0.059743	0.054891	0.053018	0.077177	0.066039	0.052015	0.071187	0.048147	0.060138	0.049864	0.051704	0.083317	0.088274	0.075791	0.08456	0.081251	0.04957	0.036558	0.043347	0.069069	0.04246	0.033271	0.059987	0.054227	0.03149	0.029324	0.053144	0.070699	0.04171
A	ArrayStrip	serum	51	ELISA pretested	0.061377	0.061734	0.061111	0.07164	0.101372	0.030791	0.044258	0.155776	0.158439	0.105551	0.098275	0.013036	0.015809	0.014056	0.006367	0.012893	0.019946	0.016676	0.010523	0.014676	0.012915	0.014812	0.002292	0.021434	0.010085	0.008393	0.011487	0.026845	0.014007	0.011605	0.014727	0.010887	0.011478	-0.001603	0.009972	0.013309	0.010207	0.006262	0.013299	0.008245	0.014671	0.0102	0.017975	0.010338	0.01866
A	ArrayStrip	serum	52	ELISA pretested	0.022074	0.023317	0.022341	0.034506	0.038504	0.039428	0.026117	0.055596	0.058287	0.067678	0.074002	0.01048	0.007478	0.00755	0.001803	0.009572	0.001249	0.02359	0.004692	0.017228	0.000736	0.006788	0.002579	0.007483	0.006996	0.007016	0.00599	0.001547	0.015447	0.009669	0.029907	0.000222	0.009132	0.002535	0.01095	0.01552	0.008529	0.008368	0.005756	0.009902	0.005918	0.003913	0.002654	0.008184	0.008091
A	ArrayStrip	serum	53	ELISA pretested	0.078897	0.074773	0.070101	0.088367	0.081266	0.065447	0.077697	0.100353	0.136494	0.170195	0.188102	0.019472	0.020238	0.023025	0.018617	0.030988	0.026079	0.022013	0.015222	0.035156	0.020784	0.013426	0.013772	0.003574	0.017358	0.019853	0.019375	0.047564	0.050309	0.036814	0.033855	0.010336	0.021335	0.025695	0.023147	0.018204	0.018114	0.015534	0.023187	0.028125	0.022755	0.021015	0.030528	0.039162	0.019322
A	ArrayStrip	serum	54	ELISA pretested	0.10576	0.09134	0.112062	INVALID	0.076735	0.05049	0.091217	0.194911	0.210068	0.152245	0.184995	0.073168	0.040308	0.050727	0.049304	0.067342	0.040034	0.03867	0.03685	0.06659	0.030892	0.032906	0.038675	0.041255	0.044483	0.042963	0.034969	0.091334	0.109236	0.078464	INVALID	0.035745	0.045928	0.036313	0.043678	0.054717	0.035427	0.034885	0.051816	0.047602	0.025623	0.027656	0.031079	0.059225	0.037589
A	ArrayStrip	serum	55	ELISA pretested	0.059563	0.044091	0.055533	0.042986	0.041165	0.036907	0.025329	0.08938	0.0826	0.101635	0.10018	0.0313	0.032166	0.031696	0.026077	0.023578	0.021157	0.039127	0.029809	0.017935	0.017846	0.011303	0.019361	0.020163	0.016561	0.025074	0.017472	0.023047	0.064919	INVALID	0.01803	0.012636	0.027732	0.017339	0.012016	0.017391	0.027386	0.012642	0.023444	0.020842	0.01904	0.012333	0.008865	0.015623	0.023022
A	ArrayStrip	serum	56	ELISA pretested	0.023672	0.031837	0.032991	0.050841	0.0508	0.02561	0.029169	0.08925	0.092178	0.059324	0.074889	0.004842	0.000552	0.006211	0.000874	0.017874	0.00089	0.003266	0.001761	0.007817	0.001335	0.003686	0.001888	0.002431	0.027848	0.002383	0.027713	0.014176	0.03309	0.008088	0.042751	0.002598	0.018752	0.003739	0.014978	0.00692	0.004695	0.004239	0.003881	0.004104	0.001704	0.003361	0.00177	0.005678	0.002078
A	ArrayStrip	serum	57	ELISA pretested	0.069262	0.056275	0.067321	0.021639	0.041998	0.042729	0.04481	0.095648	0.098831	0.092283	0.105546	0.010473	0.015937	0.008688	0.012538	0.017148	0.014301	0.011209	0.008343	0.035396	0.020122	0.014023	0.017395	0.034781	0.066369	0.023933	0.016912	0.096772	0.069987	0.038773	0.029496	0.036245	0.03081	0.080874	0.015303	0.046297	0.047521	0.030312	0.048033	0.009818	0.015975	0.017253	0.024046	0.026248	0.019884
A	ArrayStrip	serum	58	ELISA pretested	0.050333	0.052967	0.080012	0.05713	0.049171	0.043747	0.058296	0.075	0.071901	0.057632	0.08051	0.072004	0.049854	0.04667	0.054561	0.072789	0.069622	0.049425	0.049312	0.068903	0.070696	0.03732	0.061165	0.067257	0.055942	0.06421	0.040421	0.065753	0.079326	0.063346	0.041418	0.073163	0.079267	0.075128	0.056954	0.081366	0.042404	0.049654	0.074703	0.088308	0.01415	0.033843	0.056739	0.066793	0.059048
A	ArrayStrip	serum	59	ELISA pretested	0.050187	0.062913	0.059077	0.045019	0.049781	0.043711	0.046798	0.102666	0.086516	0.081448	0.125501	0.050909	0.041433	0.036101	0.054309	0.045737	0.0348	0.034764	0.050296	0.045273	0.033147	0.058733	0.046693	0.034507	0.03418	0.048945	0.034098	0.046995	0.061121	0.050901	0.058805	0.024917	0.035903	0.025241	0.039013	0.041343	0.033496	0.03362	0.05056	0.038862	0.032377	0.024396	0.046345	0.053628	0.042118
A	ArrayStrip	serum	60	ELISA pretested	0.030048	0.023287	0.0525	0.019487	0.0397	0.020562	0.025234	0.057108	0.065255	0.041616	0.063006	0.005397	0.002173	0.007301	0.001973	0.005946	0.018038	0.004859	0.003335	0.004736	0.001614	0.004544	0.004118	0.021572	0.018293	0.013209	0.019391	0.047814	0.054558	0.04865	0.076457	0.02236	0.030615	0.013142	0.036841	0.029927	0.008923	0.026656	0.014842	0.033649	0.019455	0.012088	0.005179	0.016786	0.019822
A	ArrayStrip	serum	61	ELISA pretested	0.029655	0.030536	0.044482	0.015325	0.015656	0.037169	0.017812	0.021431	0.046089	0.02458	0.036311	0.016998	0.020889	0.036093	0.036866	0.02379	0.020151	0.018417	0.027968	0.022265	0.018051	0.011811	0.028246	0.018787	0.010337	0.013149	0.01318	0.009317	0.032348	0.054611	0.015895	0.011497	0.01925	0.012999	0.012546	0.019229	0.01562	0.017054	0.02665	0.012446	0.017824	0.013354	0.031118	0.017186	0.020902
A	ArrayStrip	serum	62	ELISA pretested	0.080371	0.033819	0.080621	0.061354	0.06822	0.047384	0.042568	0.103195	0.10878	0.095971	0.118813	0.002198	0.008261	0.009705	0.005434	0.00982	0.010547	0.015636	0.00194	0.013573	0.009008	0.017923	0.017663	0.005526	0.027132	0.025218	0.014835	0.004218	0.025635	0.013259	0.02332	0.021731	0.02293	0.013537	0.025314	0.047571	0.025395	0.022259	0.032872	0.026701	0.023	0.020972	0.028768	0.013919	0.011841
A	ArrayStrip	serum	63	ELISA pretested	0.04835	0.037988	0.045687	0.037193	0.016764	0.04167	0.014636	0.043961	0.052576	0.072397	0.045947	0.015764	0.010443	0.019779	0.016674	0.004524	0.004183	0.009692	0.012888	0.008809	0.015026	0.00566	0.020977	0.002394	0.003632	0.029213	0.011896	0.020401	0.028251	0.035238	0.005147	0.007386	0.006648	0.017577	0.006517	0.010438	0.015182	0.02543	0.039675	0.008693	0.018047	0.013193	0.023083	0.018849	0.020999
A	ArrayStrip	serum	64	ELISA pretested	0.023823	0.034985	0.046096	0.029089	0.052362	0.072493	0.029146	0.079857	0.080364	0.054324	0.046899	0.00836	0.002044	0.000375	0.002783	0.010932	0.016246	0.010916	0.013224	0.001702	0.005931	0.005606	0.036572	0.004989	0.019722	-0.000865	0.005985	0.008919	0.007444	0.005152	0.014811	0.004702	0.002677	0.002624	0.010445	-1.1e-05	0.003606	0.002495	0.003734	0.001723	0.004903	0.022536	0.00521	0.00118	0.004277
A	ArrayStrip	serum	65	ELISA pretested	0.031431	0.038186	0.046097	0.025111	0.03269	0.031624	0.017602	0.093731	0.061223	0.05617	0.056282	0.013304	0.01226	0.010217	0.017152	0.005647	0.005699	0.00741	0.012469	0.00302	0.010193	0.006558	0.011441	0.005291	0.010845	0.006472	0.003778	0.014237	0.012171	0.014197	0.007937	0.010806	0.004805	0.003997	0.004863	0.011361	0.00964	0.006671	0.013978	0.011561	0.011052	0.004225	0.017715	0.002669	0.042191
A	ArrayStrip	serum	66	ELISA pretested	0.02015	0.023523	0.025528	0.016943	0.022171	0.021528	0.014193	0.059092	0.044902	0.050028	0.040114	0.029947	0.015502	0.01147	0.017579	0.008047	0.007043	0.004303	0.014341	0.006097	0.016926	0.0051	0.017003	0.009212	0.008714	0.015289	0.010982	0.014705	0.024808	0.012863	0.009646	0.009258	0.009591	0.008603	0.011694	0.013792	0.015648	0.011681	0.007175	0.014425	0.014094	0.011916	0.01119	0.019204	0.01421
A	ArrayStrip	serum	67	ELISA pretested	0.012298	0.022974	0.025214	0.018785	0.025024	0.028964	0.023984	0.070245	0.074129	0.057375	0.062517	0.001382	0.000857	0.000817	0.004169	0.002384	0.002159	0.001234	0.004254	0.000947	-0.000165	0.003922	0.003548	0.002142	0.051503	0.000323	0.000901	0.006082	0.002042	0.004103	0.002103	-0.001071	-0.00106	0.002808	0.003713	0.003559	0.002102	0.001052	0.00164	0.006494	0.000841	0.000984	0.000194	0.002818	0.000297
A	ArrayStrip	serum	68	ELISA pretested	0.081292	0.073825	0.070206	0.086561	0.077513	0.047788	0.07653	0.167869	0.148055	0.126302	0.1541	0.052125	0.033873	0.029295	0.028212	0.048443	0.026479	0.02343	0.007826	0.037757	0.031533	0.008213	0.021807	0.006274	0.019299	0.047054	0.015766	0.045029	0.04574	0.028248	0.030492	0.026735	0.025523	0.016097	0.016531	0.02838	0.021847	0.020914	0.026881	0.027916	0.025047	0.018015	0.021269	0.034925	0.022228
A	ArrayStrip	serum	69	ELISA pretested	0.069009	0.103469	0.069016	0.064544	0.054934	0.041052	0.055079	0.117161	0.124931	0.077718	0.105589	0.112259	0.061947	0.045617	0.056338	0.082742	0.050499	0.046853	0.036485	0.081841	0.047202	0.03663	0.036467	0.034663	0.035585	0.039997	0.032745	0.055736	0.063342	0.0678	0.004641	0.050287	0.051683	0.037502	0.000125	0.044475	0.028971	0.030004	0.040806	0.0469	0.027047	0.028227	0.033487	0.063466	0.031502
A	ArrayStrip	serum	70	ELISA pretested	0.027798	0.03176	0.041359	0.051083	0.045734	0.014321	0.037029	0.105157	0.090273	0.068773	0.083812	0.050916	0.0248	0.026573	0.025387	0.043227	0.018861	0.028959	0.019541	0.052279	0.020567	0.022475	0.015747	0.034271	0.031104	0.047697	0.021757	0.063034	0.058307	0.040442	0.04259	0.029063	0.024607	0.016653	0.023744	0.025543	0.020065	0.012975	0.025276	0.031396	0.019331	0.011851	0.023547	0.032915	0.023348
A	ArrayStrip	serum	71	ELISA pretested	0.035941	0.045317	0.046873	0.049467	0.039121	0.030379	0.048677	0.09559	0.092449	0.083189	0.078752	0.057001	0.033124	0.029602	0.029801	0.045646	0.023634	0.020454	0.017646	0.04681	0.019839	0.017971	0.019074	0.02047	0.031142	0.023076	0.026068	0.054734	0.051897	0.037054	0.02783	0.031467	0.020929	0.020827	0.021358	0.024333	0.021744	0.016232	0.026044	0.024787	0.022319	0.017451	0.022538	0.047207	0.026073
A	ArrayStrip	serum	72	ELISA pretested	0.057303	0.031893	0.032218	0.035462	0.033761	0.015647	0.029142	0.07836	0.089707	0.056137	0.059329	0.038643	0.02029	0.032079	0.025127	0.043429	0.027928	0.022095	0.015043	0.039681	0.027881	0.011888	0.019206	0.030398	0.033622	0.05088	0.027488	0.03948	0.04023	0.030104	0.02993	0.028696	0.030174	0.01688	0.026567	0.033459	0.025346	0.017345	0.028928	0.027572	0.017556	0.018787	0.023777	0.082276	0.02327
A	ArrayStrip	serum	74	ELISA pretested	0.078581	0.027656	0.031613	0.037062	0.046524	0.020029	0.029823	0.048384	0.064559	0.0526	0.041706	0.031853	0.038363	0.032899	0.025264	0.031841	0.029437	0.026401	0.022485	0.03266	0.030241	0.031655	0.018714	0.044056	0.01961	0.019257	0.018496	0.043056	0.036294	0.021097	0.019796	0.041669	0.023185	0.022657	0.020867	0.04609	0.037249	0.025873	0.03586	0.038604	0.031599	0.018121	0.027503	0.041056	0.02439
A	ArrayStrip	serum	75	ELISA pretested	0.054771	0.052702	0.058507	0.050299	0.058176	0.039393	0.052265	0.113795	0.126066	0.074655	0.10783	0.072087	0.039822	0.037139	0.059014	0.061631	0.040957	0.029586	0.020819	0.042961	0.030093	0.025674	0.017784	0.021714	0.038719	0.030306	0.022053	0.04687	0.067391	0.053108	0.045576	0.02495	0.033591	0.029084	0.031331	0.039774	0.031512	0.038058	0.03449	0.046689	0.029434	0.021745	0.030178	0.050705	0.004403
A	ArrayStrip	serum	76	ELISA pretested	0.064917	0.06006	0.060027	0.054447	0.056045	0.045716	0.064536	0.100107	0.099903	0.090472	0.117222	0.048664	0.032555	0.040616	0.030236	0.037618	0.033833	0.028167	0.022564	0.032305	0.030045	0.025649	0.018041	0.032468	0.034542	0.024095	0.020402	0.046457	0.035705	0.032429	0.039019	0.027926	0.022983	0.01846	0.029118	0.063867	0.024026	0.022281	0.033387	0.047417	0.020318	0.011838	0.030035	0.033326	0.019609
A	ArrayStrip	serum	77	ELISA pretested	0.108882	0.078992	0.06212	0.079251	0.072645	0.058448	0.078841	0.129257	0.096693	0.136606	0.168972	0.09079	0.010429	0.081486	0.066954	0.079501	0.046102	0.061681	0.056267	0.067741	0.002078	0.025196	0.046781	0.040976	0.045632	0.049961	0.033087	0.066053	0.081107	0.121856	0.047908	0.042933	0.048692	0.031223	0.046922	0.044934	0.043056	0.030216	0.03737	0.052147	0.033724	0.036793	0.039588	0.044604	0.041672
A	ArrayStrip	serum	78	ELISA pretested	0.028733	0.029681	0.028807	0.035377	0.035692	0.01747	0.030954	0.052688	0.063302	0.046595	0.052632	0.029507	0.028144	0.016877	0.029285	0.038931	0.033309	0.023594	0.017959	0.041734	0.031839	0.021557	0.018988	0.037452	0.030918	0.024452	0.029302	0.071054	0.05916	0.039056	0.041283	0.027363	0.029641	0.018051	0.028435	0.033914	0.026879	0.026278	0.03358	0.04501	0.025171	0.08207	0.028962	0.039159	0.025589
A	ArrayStrip	serum	79	ELISA pretested	0.09322	0.09303	0.068382	0.079008	0.072248	0.056307	0.081695	0.135543	0.143646	0.114515	0.139448	0.03508	0.031279	0.019631	0.035754	0.039103	0.033648	0.028182	0.032808	0.05647	0.057019	0.03591	0.03811	0.034564	0.046183	0.045667	0.037276	0.071452	0.073759	0.062372	0.066508	0.04453	0.04898	0.048122	0.057553	0.062527	0.047217	0.041648	0.056237	0.05245	0.040282	0.031613	0.053378	0.060354	0.041429
A	ArrayStrip	serum	80	ELISA pretested	0.020838	0.035194	0.035472	0.028613	0.023536	0.013272	0.024467	0.055455	0.054696	0.032348	0.062656	0.009239	0.000723	0.001187	0.004365	0.006104	0.003395	0.006094	0.008051	0.011804	0.005122	0.006607	0.005076	0.00726	0.011155	0.00607	0.008643	0.026554	0.016249	0.017157	0.017054	0.005546	-0.00251	0.005935	0.03304	0.009945	0.0074	0.008382	0.012605	0.007776	0.007581	0.025738	0.008279	0.009651	0.00411
A	ArrayStrip	serum	81	ELISA pretested	0.045616	0.07722	0.086021	0.062716	0.067187	0.049411	0.088246	0.155157	0.050713	0.101188	0.12445	0.051735	0.037861	0.030614	0.059778	0.088297	0.025616	0.038645	0.044911	0.126206	0.087006	0.05391	0.061753	0.053125	0.045949	0.048069	0.065454	0.040846	0.07499	0.035019	0.037434	0.046413	INVALID	0.045439	0.120621	0.057357	0.059336	0.059812	0.076093	0.03659	0.030568	0.022012	0.078134	0.057566	0.06651
A	ArrayStrip	serum	82	ELISA pretested	0.036488	0.045776	0.042282	0.030202	0.041263	0.047129	0.028458	0.084514	0.097449	0.082429	0.068113	0.001491	0.008659	0.007124	0.006132	0.004497	0.004692	0.004093	0.00161	0.013508	0.012646	0.009693	0.010686	0.007137	0.00705	0.015038	0.010684	0.008394	0.048402	0.008457	0.00985	0.005649	-0.007379	0.002116	0.007137	0.009945	0.00676	0.01291	0.011489	0.005895	0.010441	0.015991	0.010669	0.024753	0.020168
A	ArrayStrip	serum	83	ELISA pretested	0.044675	0.052216	0.052131	0.045267	0.043273	0.027259	0.039426	0.098661	0.097979	0.090688	0.107407	0.002406	0.002484	INVALID	0.004341	0.005483	0.007963	-0.002832	0.005905	0.009567	0.007094	0.011041	0.007	0.005983	0.011605	0.034635	0.00956	0.023443	0.01934	0.020081	0.014836	0.006647	0.003952	0.004246	0.009932	0.006029	0.00403	0.005623	0.011245	0.006102	0.004584	0.007975	0.005674	0.016218	0.00891
A	ArrayStrip	serum	84	ELISA pretested	0.003439	0.020321	0.005795	0.013329	0.008806	0.001808	0.005916	0.042662	0.038966	0.032724	0.022971	0.006918	0.004535	0.000822	0.001706	0.00521	0.002841	-0.000938	0.00254	0.002051	0.000561	0.001423	0.001037	0.005283	0.003163	0.050985	0.000712	0.008814	0.005981	0.001863	0.000868	0.006182	-0.002367	0.002586	0.002095	0.009303	0.000814	0.049936	0.006645	0.002557	0.00189	0.005343	0.000886	0.006448	0.00129
A	ArrayStrip	serum	85	ELISA pretested	0.055601	0.051486	0.072212	0.052456	0.055224	0.035496	0.034297	0.104633	0.116543	0.088961	0.152274	-0.00407	0.002281	0.003739	0.003914	-0.000368	0.003498	0.001393	0.008758	0.005106	INVALID	0.003898	0.006559	0.018993	0.067004	0.009935	-0.000134	0.012227	0.012962	0.047383	0.007078	0.011259	0.030113	0.007715	0.002034	0.004994	0.007534	0.008041	0.044945	0.007788	0.003634	0.003224	0.006998	0.004741	0.004358
A	ArrayStrip	serum	86	ELISA pretested	0.061049	0.07412	0.055358	0.068322	0.054603	0.04555	0.079406	0.181886	0.129055	0.134641	0.144943	0.004568	0.001306	0.067432	0.002797	0.005028	0.002825	0.000693	0.023031	0.005151	0.003887	0.010711	0.003588	0.004883	0.012545	0.018774	0.008506	0.015741	0.026447	0.024051	0.019594	0.012257	0.016862	0.0029	0.002996	0.016923	0.00441	0.004657	0.013165	0.011479	0.002611	0.001326	0.014136	0.012794	0.00647
A	ArrayStrip	serum	87	ELISA pretested	0.186308	0.237031	0.175731	0.266355	0.183162	0.195904	0.122332	0.33559	0.319505	0.268861	0.316385	0.049192	0.04135	0.033412	0.022712	0.034482	0.008465	0.016889	0.013538	0.038463	0.022644	0.025875	0.014955	0.06684	0.037111	0.040917	0.032959	0.095378	0.172465	0.091874	0.08219	0.033573	0.03299	0.028251	0.019472	0.031085	0.034272	0.021996	0.034431	0.030959	0.023151	0.023504	0.031927	0.05094	0.042242
A	ArrayStrip	serum	88	ELISA pretested	0.04855	0.052602	0.051094	0.062346	0.058792	0.061248	INVALID	0.164993	0.144506	0.084871	0.133688	0.016612	0.010303	0.011585	0.005987	0.017127	0.013206	0.008003	0.002862	0.00929	0.012968	0.006756	0.007393	0.04516	0.009433	0.005373	0.007959	0.020684	0.022654	0.037935	0.024919	0.007912	0.003564	0.004639	0.009748	0.008198	0.011229	0.0099	0.012745	0.012263	0.006456	0.00266	0.014107	0.012128	0.00894
A	ArrayStrip	serum	89	ELISA pretested	0.091025	0.085084	0.082014	0.137174	0.152665	0.113354	0.099114	0.190779	0.198714	0.165649	0.192512	0.107494	0.069355	0.045606	0.026355	0.110698	0.081941	0.072479	0.06326	0.099418	0.055434	0.066969	0.042404	0.066332	0.053617	0.045282	0.060872	0.048031	0.055511	INVALID	0.050604	0.048371	0.039144	0.025936	0.06029	0.119786	0.054326	0.079201	0.09048	0.028051	0.080903	0.059903	0.025235	0.130374	0.096934
A	ArrayStrip	serum	90	ELISA pretested	0.044419	0.04022	0.043968	0.037894	0.057505	0.030577	0.045237	0.126709	0.108051	0.1171	0.144226	0.017878	-0.000238	0.009119	0.006683	0.007276	0.001284	0.0107	0.003116	0.020336	0.001509	0.014251	0.005394	0.018503	0.011861	0.008901	0.004626	0.022323	0.039019	0.025609	0.011967	0.012046	0.006247	0.020412	0.005467	0.013259	0.004124	0.006772	0.009878	0.011786	0.000689	0.006031	0.016555	0.015249	0.001894
A	ArrayStrip	serum	107	T. gondii positive	0.192463	0.136079	0.13798	0.143004	0.121929	0.105578	0.090499	0.167263	0.203552	0.186289	0.207331	0.121462	0.050927	0.056125	0.05396	0.070426	0.043719	0.044008	0.048613	0.067408	0.039955	0.043478	0.04115	0.048897	0.031612	0.036205	0.031279	0.066051	0.061483	0.066494	0.074084	0.061555	0.04301	0.030866	0.049871	0.052786	0.040793	0.038898	0.052626	0.056416	0.047545	INVALID	0.040915	0.055117	0.03083
A	ArrayStrip	serum	108	T. gondii positive	0.091667	0.079091	0.098447	0.090867	0.07961	0.048148	0.078427	0.21008	0.212175	0.166018	0.207691	0.026336	0.018369	0.015129	0.030641	0.018639	0.01202	0.013484	0.004638	0.030352	0.017917	0.01913	0.010775	0.012946	0.010537	0.072516	0.009688	0.050627	0.060219	0.039899	0.038039	0.012036	0.013223	0.006024	0.00878	0.011227	0.011549	0.004846	0.010304	0.011257	0.00963	0.008709	0.011907	0.016569	0.015075
A	ArrayStrip	serum	109	T. gondii positive	0.061253	0.063169	0.05955	0.052102	0.0616	0.039669	0.042011	0.085533	0.058613	0.067787	0.05845	0.134187	0.073829	0.075214	0.052089	0.112799	0.05518	0.051106	0.055983	0.126642	0.06432	0.04366	0.050402	0.068721	0.041489	0.042803	0.093106	0.08333	0.06387	0.045442	0.055411	0.047029	0.04885	0.043104	0.073461	0.102205	0.059168	0.045221	0.080371	0.084308	0.050819	0.03541	0.059842	0.068615	0.03308
A	ArrayStrip	serum	110	T. gondii positive	0.079002	0.08463	0.093959	0.066865	0.073433	0.065398	0.07676	0.148407	0.167945	0.135576	0.127509	0.07829	0.060353	0.054797	0.066201	0.056322	0.038575	0.035881	0.040471	0.058218	0.031532	0.029272	0.040444	0.04053	0.042788	0.054045	0.038921	0.060251	0.071847	0.067721	0.081639	0.043349	0.044176	0.044834	0.061539	0.051028	0.032897	0.028222	0.042032	0.034898	0.032315	0.033618	0.040413	0.051161	0.029755
A	ArrayStrip	serum	111	T. gondii positive	0.073009	0.082621	0.065876	0.122455	0.047245	0.042994	0.052279	0.08021	0.158528	0.085863	0.11227	0.062822	0.035549	0.036346	0.045799	0.03643	0.123744	0.030267	0.043283	0.036049	0.023446	0.017483	0.027852	0.034454	0.067479	0.064318	0.027476	0.038489	0.041946	0.035671	INVALID	0.025695	0.025469	0.031842	0.029365	0.037937	0.025646	0.029494	0.040236	0.033706	0.024523	0.021396	0.027401	0.040622	0.024978
A	ArrayStrip	serum	112	T. gondii positive	0.090489	0.124842	0.022831	0.09757	0.083662	0.07694	0.096793	0.165216	0.139739	0.153842	0.196283	0.098218	0.078168	0.062694	0.08923	0.088932	0.08394	0.057443	0.065291	0.105114	0.03219	0.068181	0.06638	0.027559	0.046848	0.047505	0.048275	0.018598	0.106203	0.098849	0.094862	0.013137	0.067035	INVALID	0.051003	0.061047	0.046397	0.03254	0.065474	0.053683	0.054085	0.038932	0.060143	0.067269	0.046747
A	ArrayStrip	serum	113	T. gondii positive	0.013669	0.02291	0.031414	0.014698	0.02884	0.01519	0.014893	0.031964	0.040494	0.033875	0.04381	0.013545	0.015068	0.00716	0.008878	0.022225	0.009419	0.007955	0.017808	0.016117	0.005712	0.038697	0.009151	0.006786	0.005331	0.007549	0.006775	0.0153	0.037848	0.020405	0.042709	0.000521	0.010188	0.004905	0.003312	0.00618	0.012194	0.006802	0.006347	0.007119	0.006281	-0.003153	0.009123	0.013001	0.00904
A	ArrayStrip	buffer	buffer	buffer	0.003454	0.000476	0.000237	-0.000128	-0.000407	0.003279	0.001785	0.001449	0.003494	-0.001466	0.002697	0.000439	0.000567	-0.001742	0.004776	0.004796	0.000628	0.006359	-0.000483	0.007045	0.00124	0.012931	0.001998	0.016593	0.004552	0.001647	0.000536	0.019187	0.000311	0.001953	0.001559	0.017934	0.002018	0.001018	0.002001	-0.003229	0.002159	-0.000992	0.001849	0.001641	0.001964	-0.000832	0.001519	-0.003204	-5.9e-05
B	ArrayStrip	meat juice	1	ELISA pretested	0.018688	0.018368	0.019411	0.012609	0.013218	0.003676	0.014382	0.01004	0.015207	INVALID	0.028666	0.023102	0.008163	0.003614	0.003788	0.001126	0.076431	0.004664	0.00904	0.074266	0.003895	0.002533	0.003148	0.001103	0.005719	0.012221	-0.000974	0.001117	3.4e-05	0.007632	0.00087	0.022789	-0.001361	0.004618	0.002548	0.002774	0.004344	0.003564	0.002839	0.001644	0.006804	-0.000802	0.012091	0.003756	0.050608
B	ArrayStrip	meat juice	2	ELISA pretested	0.016961	0.018358	0.023148	0.002259	0.011636	0.018875	0.012787	0.010748	0.014169	INVALID	0.046581	0.000197	0.003547	0.002507	0.003908	0.000706	0.006525	0.002278	0.003221	0.000977	0.003408	0.002898	0.003604	-1.8e-05	-0.000605	0.000526	0.000315	0.000625	0.001307	0.011605	0.004407	0.004082	0.005879	0.007588	0.001358	0.004407	0.003076	0.004386	0.001052	0.001015	0.000478	0.003497	0.001878	0.001526	0.001188
B	ArrayStrip	meat juice	3	ELISA pretested	0.017376	0.018195	0.021184	0.018408	0.017936	0.015577	0.023929	0.006809	0.021097	INVALID	0.035001	0.001241	0.003165	0.069291	0.001593	0.007408	0.004059	0.011293	0.00441	0.003712	0.003008	0.004083	0.004462	0.000479	0.001945	0.002194	0.001424	0.006572	0.00155	0.000345	0.003321	0.000714	0.008458	0.000819	0.001656	0.001483	0.00128	-0.000311	0.002322	0.009674	0.001927	-0.012676	0.000643	-0.00122	0.001504
B	ArrayStrip	meat juice	4	ELISA pretested	0.01657	0.016873	0.012655	0.019414	0.010842	0.009876	0.011266	-0.005302	0.006558	0.000558	0.03464	0.000552	0.005106	-0.00527	0.004717	0.001609	0.003042	0.00279	0.003366	0.093479	0.001981	0.004592	0.003386	0.00133	0.00299	0.003456	0.005078	0.005564	0.001524	0.002608	0.007831	0.001347	0.001473	0.013211	0.00166	0.004736	-0.00216	0.010768	0.004641	-0.000469	0.006049	0.002948	0.003162	0.00266	0.005558
B	ArrayStrip	meat juice	5	ELISA pretested	0.019941	0.0223	0.021706	-0.003603	0.001132	-0.002239	0.012522	0.004766	0.014104	INVALID	0.031855	INVALID	0.00131	-0.00104	0.000494	0.003053	0.00467	0.007157	0.003431	-0.00027	0.000499	0.004353	0.001356	0.002195	0.000982	0.003231	0.003241	-0.00029	-0.00064	0.000701	0.003925	0.004149	0.001313	INVALID	0.001071	0.001997	0.002262	0.00262	-0.004469	0.008807	0.004418	0.001284	0.002282	-0.001177	0.005083
B	ArrayStrip	meat juice	6	ELISA pretested	0.026668	0.018567	0.019529	-0.005195	0.002619	0.013797	0.008625	0.002134	0.026461	INVALID	0.031783	0.002406	0.003294	0.000587	0.00219	0.004073	0.005093	0.006902	0.003159	0.006467	0.012857	0.003433	0.003402	0.003247	0.011491	0.006269	0.000283	0.003236	0.002498	0.00087	-0.003056	0.007302	0.005823	0.013437	0.002105	0.008796	0.001867	0.005663	0.002689	0.001518	0.005901	0.001284	0.008458	0.002829	0.006575
B	ArrayStrip	meat juice	7	ELISA pretested	0.017734	0.016819	0.020431	0.011764	0.016441	0.005139	0.013976	0.046144	0.045592	INVALID	0.019921	0.003841	-0.001159	0.005519	0.002212	0.007686	INVALID	0.014277	0.002632	0.020402	0.006144	0.011742	0.00074	INVALID	0.009302	0.001425	0.001728	0.007906	0.002858	0.001153	0.000403	-0.002646	0.007926	0.004263	0.003535	-0.000322	0.002145	0.042809	0.00141	-0.001998	0.010633	0.002464	0.002802	0.003423	0.013064
B	ArrayStrip	meat juice	8	ELISA pretested	0.014481	0.014929	0.012553	0.005052	0.004478	0.004747	0.005744	0.003844	0.007708	INVALID	0.021283	0.002188	0.003131	0.005332	0.000396	0.000945	0.005995	0.013498	0.002505	0.002936	0.001533	0.003302	0.003389	0.001504	0.003943	0.001242	0.002959	0.00345	0.00165	5.7e-05	0.003446	0.002159	0.002231	0.006109	0.005503	0.002397	0.019748	0.002105	0.006661	0.000701	0.001831	0.001624	0.001357	0.00241	0.001945
B	ArrayStrip	meat juice	9	ELISA pretested	0.01362	0.009385	0.008262	0.008215	0.007102	0.005333	0.004746	0.017799	0.027884	0.023226	0.01956	0.000949	0.00282	0.001004	-0.000329	-0.000263	0.003168	0.006746	0.00242	0.004062	0.002349	0.001898	0.005439	0.003983	-0.00066	0.001164	0.001875	0.003056	0.008936	0.003766	0.010104	0.002718	0.002471	0.002224	0.007957	0.003134	0.002628	0.006874	0.009802	0.003024	0.001885	0.000301	0.018559	0.004446	0.005379
B	ArrayStrip	meat juice	10	ELISA pretested	0.026567	0.019658	0.026299	0.011984	0.008601	0.009132	0.007628	0.029814	0.029497	0.025349	0.023635	0.002362	0.007654	0.005754	0.070466	0.006655	0.001073	0.00368	0.004264	0.001219	0.002029	0.003861	0.000715	0.00339	0.000123	0.003273	0.00513	0.001566	0.001813	0.000747	0.000612	-7.4e-05	0.000952	0.001955	0.003244	0.005741	0.002268	0.003462	0.005608	0.003153	0.00727	0.007862	0.006674	0.008756	0.00727
B	ArrayStrip	meat juice	11	ELISA pretested	0.045228	0.011463	0.011591	0.009809	0.009227	0.004701	0.006365	0.012212	0.008176	INVALID	0.0156	0.004822	0.001055	0.020762	0.002715	0.000775	0.004403	0.003453	0.005533	0.053828	0.002037	0.002255	0.001424	9e-06	0.004621	0.006275	0.003347	0.003518	0.001871	0.004043	0.002823	0.002053	0.001213	0.000841	0.00409	0.000657	0.000657	0.003957	0.000542	0.003129	0.000738	0.002132	0.000415	0.001815	0.001979
B	ArrayStrip	meat juice	12	ELISA pretested	0.003033	0.013787	0.008677	-0.002366	0.040447	-0.006108	0.012917	0.001541	0.014282	0.00243	0.016579	0.006027	-0.001774	0.00362	0.001568	0.001412	0.000728	0.001316	0.000914	0.001394	0.003475	0.002302	0.002246	0.004245	-0.002889	0.000464	0.00148	0.001452	0.000461	-0.003166	0.002495	0.001643	0.003938	0.00405	0.000434	7.6e-05	0.002936	0.010484	0.004623	0.003316	-0.001002	0.002642	-0.001022	0.002692	0.005571
B	ArrayStrip	meat juice	13	ELISA pretested	0.007021	0.042551	0.015513	0.009312	0.011234	0.019288	0.007695	0.000874	0.001673	INVALID	0.009445	0.002671	0.006069	0.001719	0.002197	0.005064	0.007159	0.001031	0.000858	0.005212	0.008702	0.002903	0.005082	0.005781	-0.000565	0.000702	-0.00141	0.001419	0.009127	-0.004069	0.001764	0.001137	0.00415	0.004163	-0.000391	-0.000839	0.004333	0.003677	0.004482	0.002496	0.016013	0.004581	0.005275	0.005713	0.016741
B	ArrayStrip	meat juice	14	ELISA pretested	0.028185	0.026271	0.022956	0.018891	0.019509	0.015794	0.039067	0.007268	0.009177	INVALID	0.044859	-0.00083	0.004491	0.010171	0.04322	0.000563	0.007004	0.004687	0.008536	0.006368	0.002333	0.000922	0.003026	0.010888	0.01415	0.00951	-0.006626	0.003403	0.011069	0.009005	0.017344	0.011035	0.008761	0.008985	0.00847	0.008209	0.00804	0.008418	0.004394	0.003977	0.008976	0.005699	0.024271	0.00955	0.015581
B	ArrayStrip	meat juice	15	ELISA pretested	0.075327	0.020087	0.018471	0.02331	0.021392	0.030682	0.022538	0.018114	0.028242	INVALID	0.043922	0.00538	0.004244	-0.001393	0.001101	0.001424	0.002765	0.001449	0.00377	0.004023	0.005629	-0.005192	0.003113	-0.000296	0.002628	0.005411	0.003954	0.002012	0.003516	0.004282	0.001837	0.003097	0.002084	0.002726	0.001313	0.001202	0.001476	0.00107	0.002433	0.002181	0.008274	-0.000611	0.002889	0.001262	0.00563
B	ArrayStrip	meat juice	16	ELISA pretested	0.033404	0.033202	0.03199	0.038858	0.056366	0.04445	0.040962	0.045031	0.051341	0.002038	0.045553	0.013847	0.01459	0.005882	0.018937	0.012094	0.020304	0.013944	0.009535	0.022193	0.018823	0.01545	0.012833	0.03239	0.036139	0.034314	0.025446	0.052663	0.031241	0.039104	0.032657	0.034613	0.024457	0.023326	0.02106	0.051249	0.042397	0.040126	0.039484	0.027047	0.032916	0.027227	0.030475	0.022162	0.022953
B	ArrayStrip	meat juice	17	ELISA pretested	0.012318	0.021384	0.019586	-0.003806	0.012389	0.023052	0.03007	0.023063	0.009094	INVALID	0.04564	0.014137	0.026673	0.01479	0.014713	0.005085	0.077562	0.005925	0.008322	0.004471	0.003896	0.003258	0.007286	0.008283	-0.000799	0.007348	0.014331	0.001383	-0.000879	0.009335	0.004873	0.027296	0.008684	0.000239	0.005918	0.00193	0.012179	-0.003219	0.010591	0.0125	0.00627	0.020651	0.010898	0.005418	0.009249
B	ArrayStrip	meat juice	18	ELISA pretested	0.017151	0.019156	0.014459	-0.004457	-0.004884	0.018093	0.003242	0.011749	0.010109	INVALID	0.033891	0.00923	0.00942	0.009344	0.010533	0.004817	0.034371	0.006414	0.007702	0.004642	0.00235	0.000973	-0.000629	-0.004479	0.005437	0.003185	0.007577	0.000547	0.003495	0.008594	0.003964	0.0015	INVALID	0.002294	0.00869	0.005586	0.003102	-0.001062	0.005681	0.056865	INVALID	0.008473	0.005513	0.002773	0.006388
B	ArrayStrip	meat juice	19	ELISA pretested	0.013901	0.011573	0.005321	-0.003813	-0.005661	0.035872	0.003928	-0.001684	-0.001792	INVALID	0.025727	0.001744	0.003514	0.002773	-0.00259	0.002345	0.003987	0.008427	0.000285	0.007735	0.006186	0.00757	0.00158	0.005671	0.006548	-0.002304	0.007136	0.00272	0.001438	0.007309	0.00101	0.035651	0.002057	0.004271	0.003226	0.003066	-0.00754	-0.005897	0.00452	-0.002301	0.00626	0.011133	0.002498	0.001769	0.006502
B	ArrayStrip	meat juice	20	ELISA pretested	0.015545	0.013452	0.013162	-0.001906	-0.004462	-0.008022	0.009084	-0.004427	0.008108	INVALID	0.026809	0.003717	0.004244	0.010599	0.006421	0.006336	0.004797	-0.000267	0.001163	0.001953	0.003715	0.004979	0.002457	0.009385	0.008292	0.004246	-0.000338	0.008015	-0.000323	0.002829	0.005029	0.005544	0.00617	0.004633	0.00111	0.008807	0.003451	0.000807	0.010184	0.008285	0.000958	0.001005	0.000489	0.002413	0.05979
B	ArrayStrip	meat juice	21	ELISA pretested	0.018265	0.008945	0.015845	0.001501	-0.004081	0.019011	0.007634	0.003769	0.011236	INVALID	0.016785	0.011737	0.005239	0.008267	-1e-05	0.004757	0.004009	0.003776	0.001557	0.005734	0.091014	0.003567	0.002838	0.003761	0.000386	0.0024	0.004942	0.002281	-0.001597	0.006201	0.00107	0.003314	0.005663	0.011162	0.007568	0.001288	0.00053	0.001321	0.006208	0.002509	0.003464	0.003242	0.004559	0.003956	0.006044
B	ArrayStrip	meat juice	22	ELISA pretested	0.016729	0.017866	0.031207	0.016104	0.024813	0.006745	0.021021	0.010013	0.008594	0.023744	0.034216	0.000733	INVALID	0.014012	0.004255	-0.000421	0.002269	0.000134	0.0016	0.000333	0.00214	0.003016	0.001918	-0.003047	0.000754	0.00124	0.005711	0.003211	-9.5e-05	0.003027	0.002717	0.001831	0.002992	0.003689	0.002197	0.005489	-0.003814	INVALID	0.003608	0.0018	0.033295	-0.008795	0.006057	0.008763	-0.00306
B	ArrayStrip	meat juice	23	ELISA pretested	0.036457	0.040822	0.02953	0.035019	0.033623	0.03708	0.025896	0.043137	0.043363	INVALID	0.056845	-0.001725	0.005648	0.000888	0.002715	0.003788	0.002452	-0.000452	0.000792	0.001202	0.000632	0.008311	0.001419	0.003892	0.003325	0.000839	0.002593	0.011854	0.000145	0.00172	-0.00104	0.004986	0.001702	0.001236	-0.000138	0.000706	0.002187	0.003006	0.003011	0.004422	0.004017	0.005957	0.003946	-0.000532	0.009665
B	ArrayStrip	meat juice	24	ELISA pretested	0.01135	0.00705	0.005265	0.000982	0.004642	0.003724	0.007885	0.002343	0.001312	0.000996	0.01182	0.088218	0.003304	0.005236	0.003218	0.006448	0.004314	0.006304	0.003821	0.003719	0.006233	0.002749	0.002237	-0.00091	0.005616	0.000508	0.00555	0.002554	0.005579	0.000875	0.002371	0.00462	0.003231	0.002583	0.003246	-0.001263	0.001978	0.002555	0.003355	0.007429	0.013291	0.000684	0.003222	0.002902	0.003933
B	ArrayStrip	meat juice	25	ELISA pretested	0.016627	0.008922	0.023012	0.003009	0.011285	0.011997	0.00909	0.027138	0.019419	0.020359	0.021154	0.002169	0.002941	0.002137	0.005624	0.001667	0.001212	0.001885	-0.001108	0.001756	0.003395	0.004088	0.006509	0.001793	0.005268	-0.000111	0.00595	0.002677	0.00239	0.000223	5.4e-05	0.001939	0.004338	0.003889	0.009485	0.001185	0.003204	0.003269	0.004588	0.004549	0.002212	0.001721	0.004642	0.005053	0.002944
B	ArrayStrip	meat juice	26	ELISA pretested	0.009362	0.007243	0.013514	0.00931	0.008892	0.006898	0.008534	0.023976	0.000276	0.017678	0.010841	0.002109	0.00151	0.005299	-0.001634	0.002141	0.022493	0.002768	0.003297	-0.001965	0.006811	0.001338	0.000275	0.003122	-0.000212	0.000711	-7.2e-05	0.002653	INVALID	0.003283	0.003453	0.005262	0.000802	0.001849	0.003693	0.003556	0.000662	0.003605	0.023463	0.002107	0.010703	0.032942	0.00394	0.00513	0.003954
B	ArrayStrip	meat juice	27	ELISA pretested	0.013819	INVALID	0.017503	INVALID	9.9e-05	0.009312	0.014075	INVALID	0.005436	0.020649	0.023051	0.017533	0.0048	0.001198	0.012182	0.007655	0.028295	0.055629	0.001736	0.036817	0.001343	0.003206	0.002141	0.002403	0.00049	0.0048	0.012362	0.017856	0.002644	0.004811	0.018098	0.008379	0.005336	0.005281	0.002556	0.017091	INVALID	0.00293	-0.002516	0.04249	0.043795	0.013676	0.00144	0.012187	-0.000104
B	ArrayStrip	meat juice	28	ELISA pretested	0.010668	0.008193	0.014664	0.007748	0.00621	0.002098	0.006703	0.013868	0.009735	INVALID	0.018563	0.032609	0.041671	0.00368	0.004935	0.057298	0.068184	0.006194	0.002974	0.003938	0.006531	0.001874	0.004782	0.004233	0.005125	0.016971	0.029293	0.002015	0.002517	0.004759	0.01232	0.002122	0.001155	-0.000185	0.001975	0.003296	0.001007	0.02289	0.000322	0.000688	-0.003279	0.036593	0.001502	0.003926	0.013814
B	ArrayStrip	meat juice	29	ELISA pretested	0.00529	0.003945	0.035306	-0.003811	0.005123	-0.000636	0.002227	0.003736	0.006116	INVALID	0.017279	0.003745	0.001163	0.003518	0.000561	0.00032	0.002732	0.001197	0.006189	0.001914	0.002224	0.003595	0.005976	0.000861	0.003818	0.000657	0.00419	0.019634	0.012001	0.004074	0.004538	0.004608	0.009636	-1e-05	0.005627	0.004286	0.005488	0.005923	0.004334	0.007827	0.02423	0.003855	0.010808	0.004877	0.006486
B	ArrayStrip	meat juice	30	ELISA pretested	0.017969	0.005042	0.023594	0.004128	0.004787	0.01171	0.029107	0.027026	0.011748	INVALID	0.030301	0.011579	0.003924	-0.001041	0.005012	0.010527	0.005336	0.001645	-0.000176	-0.010871	0.003964	0.007301	0.00274	-0.002192	0.001687	0.000259	0.003744	0.007173	0.000885	0.007843	0.005378	0.006877	0.001607	0.001422	0.002847	0.006069	0.005486	0.001787	0.007739	0.018202	0.008399	0.003612	0.005274	0.00461	0.005311
B	ArrayStrip	meat juice	31	ELISA pretested	0.021116	0.018607	0.016536	0.022948	0.021327	0.019984	0.028321	0.020457	0.033711	INVALID	0.030544	-0.010652	0.008044	0.00628	0.005953	INVALID	0.0108	0.005308	0.005405	0.220825	0.002264	0.003582	0.002354	0.007564	0.000507	0.002109	0.003917	0.014267	0.007233	0.002151	0.006166	-0.000191	0.004621	0.003965	0.004407	0.006363	0.001085	0.008797	0.008929	0.001923	-4.1e-05	0.022914	0.004601	0.001375	0.006241
B	ArrayStrip	meat juice	32	ELISA pretested	0.012835	0.01306	0.041697	0.01566	-0.007786	0.003163	0.017278	0.013984	0.022625	INVALID	0.02748	INVALID	0.001373	0.005168	0.006166	0.002799	0.010796	-0.003885	0.004197	0.003151	0.002336	0.022249	0.001799	0.03524	0.006945	0.006742	0.005559	0.014468	0.011624	0.005994	0.002332	0.007714	0.006497	0.006547	0.008781	0.007136	0.00786	-0.002624	0.009519	0.006724	0.002914	0.010425	0.010309	0.004446	0.010917
B	ArrayStrip	meat juice	33	ELISA pretested	0.019236	0.020294	0.017928	0.021185	-0.000231	0.019576	0.018851	0.011416	0.019028	INVALID	0.029616	0.003961	0.005776	0.002161	0.007103	0.004159	0.004539	0.009974	0.002125	0.004934	0.003241	0.00313	0.000285	0.001357	-0.002118	0.020277	-0.002025	0.000506	0.002262	0.001984	0.004602	-0.004285	0.002271	0.006381	0.005819	0.004079	0.004192	0.004018	0.003055	0.002438	0.003207	0.006849	0.003593	0.001335	-0.001153
B	ArrayStrip	meat juice	34	ELISA pretested	0.017309	0.020723	0.012346	0.012696	-0.003129	0.011381	0.018041	0.011105	0.023537	INVALID	0.03369	0.002385	0.002259	-0.000498	0.007896	0.002026	0.006401	-0.004797	-0.001541	0.001429	0.003074	-0.001841	0.002354	-0.001697	0.004023	0.000724	0.004217	0.012974	0.017256	0.014144	0.004035	0.000923	0.001803	0.004177	0.006495	0.004223	0.001244	0.005501	0.000901	-0.000183	0.013425	0.005931	0.006389	0.001822	0.00548
B	ArrayStrip	meat juice	35	ELISA pretested	0.00672	0.014896	0.021817	0.024786	0.023621	0.024299	0.032208	0.006981	0.007746	INVALID	0.033929	0.00451	0.001098	0.00617	0.006828	0.007742	0.006127	0.009117	0.003733	0.001777	0.002394	-0.004012	-0.000709	0.003781	0.00369	-0.005018	0.003282	-0.001891	0.005668	0.00285	0.005462	0.001018	0.005777	0.002056	0.016117	0.003226	-0.000469	0.002378	0.008528	0.000802	0.005578	0.009403	0.006495	0.006581	0.008246
B	ArrayStrip	meat juice	36	ELISA pretested	0.090646	0.023134	0.015568	-0.00869	-0.001478	-0.003943	0.027943	0.006238	0.028725	INVALID	0.035047	0.003849	-0.000868	0.0017	0.003275	0.003154	0.00885	0.006319	0.006557	0.003532	-0.000105	0.003476	0.003466	-0.002222	-0.000615	-0.002867	0.00033	0.004823	0.003881	0.001651	0.006261	0.003211	0.004162	0.004463	0.00596	0.003002	0.003841	0.002407	0.003204	0.003082	0.001646	0.005563	0.004063	0.003421	0.005475
B	ArrayStrip	meat juice	38	ELISA pretested	0.010399	0.013743	0.013386	-0.002944	-0.002372	-0.002058	0.00267	0.061143	0.006488	INVALID	0.014986	-0.013876	6.5e-05	0.003147	0.003379	INVALID	-0.005264	0.020149	0.003605	INVALID	0.069298	0.011993	0.0036	-0.003154	0.00283	0.00296	0.007681	-0.000671	0.008593	0.000736	0.001356	0.028008	0.001836	0.003656	0.005471	0.001543	0.002764	0.002047	0.008013	-0.00287	0.004708	-0.006983	0.002881	0.004629	0.003385
B	ArrayStrip	meat juice	39	ELISA pretested	0.015814	0.018996	0.033953	0.072683	0.07448	0.005118	0.011249	0.00648	0.043741	INVALID	0.020378	INVALID	0.0606	0.02957	-0.004567	INVALID	0.049693	0.028691	-0.000135	INVALID	0.073215	0.004656	0.025434	0.025626	0.030327	-0.001937	0.00619	0.033258	0.021228	0.010546	0.0501	0.062139	0.072866	0.010476	-0.003696	0.075922	0.054114	0.064031	0.007378	INVALID	0.043178	0.029522	0.009016	0.066778	0.075861
B	ArrayStrip	meat juice	40	ELISA pretested	0.011916	0.029916	0.023061	0.004639	0.016123	0.014579	0.011782	0.030755	0.028063	INVALID	0.033385	0.102055	0.001088	-0.000646	0.006121	INVALID	0.002683	0.010761	0.016539	0.287977	0.001435	0.004863	-0.001921	0.007887	-0.009696	-0.001421	0.002243	0.006918	-0.008607	0.000181	0.000176	-0.001458	0.005013	0.005475	0.002122	-0.002521	0.003266	0.003635	0.007046	-0.00765	0.007262	-0.000578	-5.7e-05	INVALID	0.004674
B	ArrayStrip	meat juice	41	ELISA pretested	0.004664	0.010755	0.008769	0.030424	0.004904	0.005873	0.003809	0.009404	0.015941	INVALID	0.01391	0.007264	0.004532	0.001581	0.003468	0.0097	0.006735	-0.000248	0.001904	0.005434	3.9e-05	0.004717	-0.000237	0.001954	0.014105	0.006472	0.004515	0.005476	0.001183	0.004973	0.001349	0.018	-1.5e-05	0.001792	0.000969	0.00418	0.004123	0.002235	0.003665	0.001174	0.001884	0.050721	0.003636	0.000331	0.007414
B	ArrayStrip	meat juice	42	ELISA pretested	0.014264	0.012286	0.013519	0.011724	0.012571	0.01292	0.011761	0.022583	0.020729	0.029879	0.02008	0.002385	0.00051	0.004524	0.002033	0.002462	0.003493	0.002455	0.004021	0.003634	0.002957	0.002309	0.004384	0.000233	0.003376	0.003505	0.004721	-0.002584	0.005698	-0.000184	0.003459	-7.3e-05	0.003851	0.006737	0.00403	0.003002	0.001987	0.007772	0.00533	0.002582	0.004803	0.005141	0.0025	0.006968	0.008158
B	ArrayStrip	meat juice	43	ELISA pretested	0.007936	0.010724	0.005552	0.010451	0.00576	0.002639	0.010344	0.015838	0.012172	0.031973	0.021786	0.000671	0.003743	0.004594	-0.002278	0.002383	0.003073	0.002128	0.003133	0.006926	0.00108	0.001411	-0.000383	0.005736	-0.000455	0.002783	0.002471	0.001862	-0.001497	0.002215	0.000173	0.004646	0.00142	0.001577	0.000773	0.007211	0.001521	0.001857	0.00214	0.002217	7e-06	0.007353	0.000784	7.2e-05	0.005807
B	ArrayStrip	meat juice	44	ELISA pretested	0.005838	0.015364	0.011913	0.002051	0.009528	0.006029	0.008992	0.003546	0.004088	0.047256	0.012004	0.000932	-0.000368	0.004033	0.001125	0.0072	-0.002106	0.006169	0.003582	0.00368	0.000535	0.003259	0.005646	0.007307	0.001938	0.003883	0.001728	0.001668	0.0032	0.00545	0.000669	0.031799	0.002623	0.006878	0.004632	0.008187	INVALID	0.057878	0.003336	0.005643	0.00298	-0.000229	0.006168	0.00352	0.002688
B	ArrayStrip	meat juice	45	ELISA pretested	0.023564	0.007404	0.004413	0.033623	0.015563	0.016027	0.009217	0.005563	0.005951	INVALID	0.010612	0.020626	INVALID	0.002861	0.009312	0.02435	0.021062	0.031842	0.029917	0.07264	0.014872	0.015813	0.009488	0.018024	-0.000776	0.030168	0.007766	0.025846	0.025411	0.007167	0.005742	0.009182	0.011057	0.022232	0.032492	0.023947	0.004268	-0.001312	0.008215	0.027616	0.027832	-0.000346	0.02904	0.053472	0.020049
B	ArrayStrip	meat juice	46	ELISA pretested	0.007348	0.006369	0.012395	0.076452	0.000329	0.001389	0.006214	0.010029	0.005916	INVALID	0.022616	0.004638	0.008807	0.004534	0.001698	0.017148	0.008761	0.000693	0.005767	0.001046	-3.2e-05	0.008051	0.006589	0.006631	0.003987	0.005374	0.004244	-0.000417	0.013756	0.001493	-8.4e-05	0.097434	0.002565	0.00845	0.014322	0.004202	0.010562	0.003741	-0.000191	0.000764	0.000317	0.003232	-4.9e-05	0.006745	0.005339
B	ArrayStrip	meat juice	47	ELISA pretested	0.008819	0.010123	0.017099	-0.002056	INVALID	-0.002802	0.001312	-0.001785	0.00325	INVALID	0.028456	0.005108	-0.000914	0.0026	0.009384	-0.000553	0.005056	0.009676	0.006648	0.010206	0.002368	0.00376	0.082456	0.014085	INVALID	-0.004538	0.004498	-0.001881	0.003174	0.001831	0.004977	0.00348	0.009827	0.003906	0.005449	0.001464	-0.000575	0.000859	0.004482	0.002177	0.003839	0.003034	0.000818	0.001016	0.005188
B	ArrayStrip	meat juice	48	ELISA pretested	0.006716	INVALID	0.261216	INVALID	-0.002375	0.019132	0.0172	0.021875	0.060224	INVALID	0.019649	INVALID	-0.000846	0.000771	0.002643	0.001011	0.041162	0.000774	0.008926	0.005521	INVALID	INVALID	0.025497	0.001256	0.057348	0.000396	0.008469	0.029187	INVALID	0.001751	0.004698	INVALID	-0.007541	0.006978	INVALID	INVALID	-0.00199	-0.001619	INVALID	0.033532	0.07171	0.030162	0.0021	-0.002349	INVALID
B	ArrayStrip	meat juice	49	ELISA pretested	0.175706	0.142727	0.143786	0.318849	INVALID	0.062414	0.184381	0.27605	0.315739	INVALID	INVALID	0.370016	0.309244	0.193231	INVALID	0.369549	INVALID	0.208528	INVALID	INVALID	INVALID	0.029721	0.097555	0.415113	0.420431	0.223489	INVALID	0.378001	0.314871	0.308378	INVALID	0.441762	INVALID	0.087847	0.178675	0.331434	INVALID	0.020925	0.246013	0.372852	0.256707	0.050758	0.252392	0.334164	0.250478
B	ArrayStrip	meat juice	50	ELISA pretested	0.016259	0.015378	0.012305	0.01831	0.001157	0.015602	0.006883	-0.000597	0.0124	INVALID	0.083925	0.005846	0.007576	0.004618	0.000595	0.023996	2e-05	0.007766	0.004843	0.079303	0.00518	0.003034	0.010496	0.00631	0.003581	0.005691	0.0037	INVALID	0.004079	0.003202	0.004163	0.010395	0.005267	0.003058	0.00423	0.000993	0.00358	0.000755	0.069954	0.003256	0.006654	0.005556	0.012437	0.014395	0.011029
B	ArrayStrip	meat juice	51	ELISA pretested	0.018064	0.018721	0.016174	0.021501	0.021939	0.020872	0.023109	0.006291	0.013964	INVALID	0.037602	0.002777	0.002075	0.00221	0.003853	0.010783	0.005439	0.008536	0.004089	0.001927	0.004171	0.020729	0.00626	0.00414	0.005424	0.008958	0.005818	0.008133	0.001155	0.000106	-0.005145	0.003323	0.000613	0.00301	0.003502	0.008632	0.000562	0.000798	0.003604	0.009865	0.003919	0.006248	0.00525	-0.001174	0.009053
B	ArrayStrip	meat juice	52	ELISA pretested	0.008746	0.017006	0.010662	0.000299	0.001881	-0.007282	0.010773	0.002771	0.017337	INVALID	INVALID	0.00742	0.007396	0.00208	0.005241	0.010561	0.005464	0.006426	0.006304	0.014936	0.004932	0.003744	0.005837	-0.000339	0.001788	-0.001206	0.000423	0.035529	0.006528	0.009213	-0.000543	0.014704	-0.002317	0.005366	0.002946	0.005348	0.079056	0.005472	0.005716	0.003977	0.001267	0.020664	0.003778	0.018426	0.009904
B	ArrayStrip	meat juice	53	ELISA pretested	0.01731	0.064817	0.022749	0.004379	-0.001234	0.011994	0.014694	INVALID	0.02696	INVALID	0.027294	0.038058	0.009255	0.011266	0.014812	0.016876	0.003154	0.020041	0.011557	0.013364	0.01324	0.0208	0.015755	0.039621	0.022688	0.022372	0.008607	0.042382	0.019618	0.004767	0.006797	0.067782	0.010007	0.010267	0.008643	0.023094	0.003721	0.00165	0.00925	0.005022	0.009616	0.004947	0.010492	0.004147	0.024384
B	ArrayStrip	meat juice	54	ELISA pretested	0.01995	0.0212	0.015194	0.004889	-0.000527	0.002247	0.004779	INVALID	0.005588	INVALID	0.021033	0.00888	0.004222	0.001438	0.000382	0.004013	0.00755	0.016134	0.001734	0.002649	0.006546	0.024288	0.00119	-0.002057	0.001498	0.008704	0.068096	-0.000294	0.002799	0.002341	0.006701	0.003939	0.001103	-0.000275	0.002591	-0.000453	0.003489	0.003375	0.004686	0.004218	0.006575	0.024844	0.004898	0.002973	0.00628
B	ArrayStrip	meat juice	55	ELISA pretested	0.007095	0.01427	0.018975	0.017621	5e-05	0.011878	0.015317	0.109931	0.005597	INVALID	0.036238	0.006281	0.005202	7.2e-05	-0.002411	0.005841	0.009778	0.006232	0.006268	0.003477	0.004013	0.000799	0.003652	0.001807	0.006487	0.004718	0.007156	0.005075	0.010461	0.002733	0.003556	0.002726	0.003968	0.001471	0.001652	0.001597	0.00628	0.001526	-0.0006	0.019417	0.002427	0.003019	0.009954	-0.003922	0.008024
B	ArrayStrip	meat juice	56	ELISA pretested	0.014727	0.01047	0.005723	0.003306	0.020464	0.012234	0.014922	0.036412	0.005798	INVALID	0.042614	-0.001368	-0.001104	0.004434	-0.002951	0.02002	0.00524	0.003587	0.012783	0.001878	0.001491	0.002473	0.00047	INVALID	0.002326	0.009376	-0.002358	0.005444	0.050125	0.004453	-0.00266	0.00816	0.000165	0.003161	0.011303	0.012046	0.007017	0.003977	0.014518	0.015488	0.000194	0.006246	0.002823	0.004465	0.000978
B	ArrayStrip	meat juice	57	ELISA pretested	0.000427	0.013549	0.015425	0.053075	-0.000585	0.003639	0.005538	0.001213	0.003755	INVALID	0.008204	0.006993	0.026697	0.003062	0.003718	0.005991	0.000697	0.005893	0.005472	0.005718	0.001679	0.003343	-0.001409	0.018402	0.018171	0.000712	0.005113	0.00952	0.000161	0.00715	0.005084	INVALID	0.000588	0.002759	0.003295	0.002293	0.001716	0.005687	0.003616	0.022747	0.001228	0.003677	0.00052	0.017223	0.007173
B	ArrayStrip	meat juice	58	ELISA pretested	0.069822	0.020244	0.054017	0.03062	0.060799	0.025716	0.043502	0.040394	0.126713	INVALID	0.075134	INVALID	0.052675	0.036786	0.081303	INVALID	0.102172	0.049186	0.067002	INVALID	0.169547	0.037186	0.033393	INVALID	0.037701	0.105919	0.08048	0.241168	INVALID	0.040403	0.086179	INVALID	0.195496	0.06824	0.107303	INVALID	0.049143	0.051463	0.031829	0.039698	0.098696	0.027681	0.062171	INVALID	0.112593
B	ArrayStrip	meat juice	59	ELISA pretested	0.012583	0.015714	0.015257	0.005095	0.003268	0.005212	0.003517	0.006581	0.027193	0.022594	0.026219	0.000915	0.005266	0.006819	0.002643	0.002423	0.011099	0.00324	-0.000186	0.078631	0.001455	0.003826	0.003039	0.005932	0.005455	0.010654	-0.000769	0.006089	0.001532	-0.000537	0.005383	0.004504	0.007166	0.003842	0.001643	0.002011	0.003929	0.005517	0.01328	0.002824	0.004076	-0.000597	0.003743	0.038287	0.00575
B	ArrayStrip	meat juice	60	ELISA pretested	0.006912	0.009081	0.00485	0.004546	0.003349	0.003377	0.007337	0.007615	0.010666	0.02385	0.012985	0.001611	0.005358	0.003771	-0.002258	0.00555	0.003594	0.000607	0.001205	-0.000123	0.001206	0.006776	0.005247	0.011948	0.003768	0.019754	0.034573	0.003271	0.00733	0.087258	0.001968	0.005062	0.007949	0.005128	0.003277	INVALID	INVALID	0.002584	0.005034	0.010293	0.006776	0.002378	0.001928	0.001809	-0.001419
B	ArrayStrip	meat juice	61	ELISA pretested	0.007413	0.010969	0.008737	INVALID	0.007001	0.006492	0.012713	0.002942	0.007874	0.036869	0.007853	0.003826	0.026948	0.002952	0.012129	0.006661	0.006071	0.005253	0.005362	0.034052	0.004247	0.001766	0.006886	-0.002087	0.010463	0.010039	0.007531	0.008773	0.003863	0.001626	0.002264	-0.000341	INVALID	0.002557	0.006625	0.004428	-0.008144	0.002943	0.0006	0.018308	0.033928	0.009615	0.014061	0.019937	0.008557
B	ArrayStrip	meat juice	62	ELISA pretested	0.013794	0.006088	0.012428	0.013919	0.010419	0.009291	0.006294	0.022861	0.014787	INVALID	0.007415	0.005312	0.004488	0.006145	0.005465	0.003531	0.005452	0.006405	0.00918	0.008041	0.002582	0.009417	0.057978	0.008473	-0.002161	0.009333	0.008977	0.006952	0.007954	0.014479	0.008254	0.013181	0.004811	0.003886	0.012037	0.008435	0.013955	0.011585	0.005505	0.008782	0.011033	0.002168	0.011668	0.009266	0.00671
B	ArrayStrip	meat juice	63	ELISA pretested	0.015601	0.019353	0.019529	0.005945	0.016368	0.015218	0.008141	0.035827	0.020283	INVALID	0.018571	0.024327	0.019062	0.004631	0.005474	0.016365	0.004023	0.013746	0.015276	0.0248	0.002254	0.004281	-0.000328	0.020215	0.027064	0.01004	0.006875	0.020935	0.009046	0.006252	-0.001549	0.012175	0.024216	0.022036	0.008331	0.014958	0.004877	0.000899	0.001284	0.015408	0.005	0.005633	0.015398	0.008252	0.007815
B	ArrayStrip	meat juice	64	ELISA pretested	0.010155	0.014167	0.014634	-0.002643	0.00956	0.005611	0.005735	0.022796	0.010351	INVALID	0.01715	INVALID	INVALID	0.001547	-0.000574	0.010701	0.006989	0.001891	0.001737	INVALID	0.033567	-0.00414	-0.001817	INVALID	0.008165	-0.001802	0.007763	0.031559	0.010323	0.003602	0.003315	0.009194	0.072217	0.002694	-0.000116	-0.001488	-1.4e-05	0.003723	0.007103	0.004108	-0.000138	0.007746	INVALID	0.010125	0.005474
B	ArrayStrip	meat juice	65	ELISA pretested	0.021889	0.012485	0.011213	-0.002223	0.033845	0.015926	0.011169	0.068877	0.025808	INVALID	0.013797	0.033742	0.008526	0.000177	0.090139	0.013587	0.030547	0.003054	0.009871	0.027765	0.006173	0.011271	0.00824	INVALID	0.004441	0.013533	0.029456	0.025333	0.013847	0.006508	0.002305	0.04267	0.089753	0.03759	0.0051	0.003476	0.00196	0.011706	0.006863	0.00198	0.008169	0.013799	0.024754	INVALID	INVALID
B	ArrayStrip	meat juice	66	ELISA pretested	0.018842	0.011872	0.010108	0.023902	0.019833	0.00518	INVALID	0.007611	0.007109	INVALID	0.023158	0.005159	0.021924	0.001314	0.011141	0.006024	0.006866	0.001372	0.018279	0.003311	INVALID	-0.000727	0.002093	0.005998	0.024891	0.002267	0.012578	-0.002789	0.020904	0.003559	-0.002549	0.037096	0.00384	0.0072	0.001816	0.000868	0.001116	0.005562	0.001036	INVALID	0.01087	0.009545	0.074755	0.002475	0.05401
B	ArrayStrip	meat juice	67	ELISA pretested	0.015494	INVALID	0.013469	0.025475	0.009408	0.003245	0.019371	0.010773	0.006453	INVALID	0.030759	-0.000946	0.003191	-0.000918	0.004039	0.008206	0.003032	0.028519	0.001609	0.000576	0.056935	-0.004558	0.004831	0.008056	-0.001166	-0.00068	0.000421	-0.003121	0.003894	0.002148	-0.003795	0.025866	0.003851	0.000123	0.000391	0.002919	0.002753	4.5e-05	0.003455	0.054311	0.000131	-0.000845	0.00254	0.008905	0.009835
B	ArrayStrip	meat juice	68	ELISA pretested	0.019106	0.024591	0.013697	0.009935	9.4e-05	0.00315	0.011768	0.012614	0.017356	INVALID	0.012273	0.003676	0.07237	0.005546	0.006036	0.015993	0.011663	INVALID	0.002862	0.021283	0.006144	0.003231	0.007624	0.006521	0.002539	0.009706	0.000206	0.006632	0.00441	0.002619	0.005814	0.066771	0.008466	-0.000409	0.007042	0.012357	0.003224	0.006752	0.00015	0.011414	0.001314	0.018046	0.00382	0.006823	0.013871
B	ArrayStrip	meat juice	69	ELISA pretested	0.003488	0.008127	0.004687	-0.002747	-0.005752	-0.004082	0.001086	0.005858	0.005662	INVALID	0.013669	0.006942	0.003058	0.004937	0.04425	0.00474	0.008064	0.014048	0.004445	0.002609	-0.00095	0.012631	0.008268	0.004665	0.000511	0.005546	0.00437	0.003193	0.004445	0.003635	0.013165	0.002694	0.00936	0.001533	0.014093	0.002513	0.004458	0.005947	0.005662	0.006319	0.000589	0.000568	0.056383	0.001257	0.010727
B	ArrayStrip	meat juice	70	ELISA pretested	0.006455	0.011208	0.025441	0.017089	-0.005495	0.000279	0.004655	0.004231	0.008378	INVALID	0.029864	-0.000144	0.000908	0.006815	0.003143	0.000838	-0.000383	0.010191	0.004495	0.004523	0.002423	0.001492	0.007844	0.003611	-0.000237	0.001557	0.005034	-0.004601	0.002247	0.000261	-0.006269	0.00216	0.0023	0.006937	-0.002025	0.004911	0.008603	0.003648	-0.000908	0.003603	0.005433	0.008187	0.00461	0.001313	0.001812
B	ArrayStrip	meat juice	71	ELISA pretested	0.008296	0.00765	0.01373	0.006979	-0.003587	0.003815	0.008442	0.002322	0.00431	INVALID	0.020624	0.001664	0.003637	0.010128	0.000185	0.003237	0.000307	0.060403	0.001233	0.008396	-0.001404	-0.002097	0.007539	0.016221	0.000867	0.006058	0.009068	0.000872	0.002587	0.000368	0.003164	-2.9e-05	0.001406	0.001346	0.002866	-0.000412	0.000942	0.006984	0.00733	INVALID	0.00665	0.005758	-0.003839	0.000792	0.030714
B	ArrayStrip	meat juice	72	ELISA pretested	0.006292	0.013823	0.007107	0.004127	-0.004376	0.004079	0.008187	0.002076	0.00148	INVALID	0.013893	0.002028	0.000349	0.001813	-0.000774	0.003692	0.000785	0.005301	0.006362	0.007635	INVALID	0.008963	0.00585	0.006665	0.000951	INVALID	0.010948	0.029981	0.001693	0.005711	0.005551	0.002864	0.002847	0.000725	0.015419	0.00089	0.004603	0.002211	0.002442	0.007774	0.003837	-0.004593	0.005717	0.000373	0.004764
B	ArrayStrip	meat juice	74	ELISA pretested	0.011878	0.012164	0.014016	-2.1e-05	0.003364	0.022944	0.009938	0.021106	0.017788	INVALID	0.022097	0.089644	0.001182	0.009662	-0.001151	0.007249	-0.000762	0.006602	0.00269	0.008296	0.003747	0.001484	0.005066	0.009416	0.001078	0.010154	0.003201	0.004568	0.000718	0.000905	0.005325	0.021756	0.005711	0.004492	0.004366	0.06536	0.001898	0.003642	0.014608	0.000454	0.004575	0.002792	0.002013	0.004473	0.001827
B	ArrayStrip	meat juice	75	ELISA pretested	0.009829	0.011173	0.016166	0.004802	0.01788	0.012729	0.009305	0.012314	0.015709	INVALID	0.032519	0.00979	0.06506	0.001311	0.004649	0.008351	0.006125	0.005597	0.008559	0.003826	0.002402	0.002746	0.006848	0.006495	0.001967	0.00495	0.002112	0.030429	0.001408	0.007161	0.004292	0.005436	0.003183	0.008997	INVALID	0.011075	0.000138	0.004238	0.002587	0.005387	0.007027	0.006778	0.006309	0.009259	0.003025
B	ArrayStrip	meat juice	76	ELISA pretested	0.017438	0.010807	0.012622	0.008822	0.020005	0.007008	0.01426	0.015225	0.01744	0.020858	0.027521	INVALID	-0.00165	0.002813	-0.000428	0.016202	0.000646	0.003361	0.001478	0.011685	0.003214	0.003957	0.004102	0.001434	0.012223	0.002191	0.003473	0.006232	0.00368	0.001685	0.005161	0.010962	0.003151	0.003295	0.000177	0.000752	-0.001276	-0.000481	0.013502	0.00332	-0.001288	0.000935	0.004612	0.003537	0.005544
B	ArrayStrip	meat juice	77	ELISA pretested	0.050727	0.01621	0.011634	0.023576	0.009329	0.00651	0.006749	0.012792	0.009985	0.016442	0.011352	0.080376	0.005048	0.0011	0.001343	5.9e-05	0.004679	0.00679	0.000242	0.007056	0.001188	0.001609	0.001292	-0.00087	-0.002218	0.001416	-6e-06	0.014739	0.001599	0.002104	0.00121	0.008594	0.084271	0.000516	0.002695	0.013122	0.002146	0.001783	0.003132	0.002603	0.002913	0.014528	0.003193	0.000808	0.004786
B	ArrayStrip	meat juice	78	ELISA pretested	0.01444	0.016503	0.023948	0.008399	0.012492	0.005162	0.004755	0.019839	0.019832	0.032064	0.017856	0.004188	0.0042	0.006638	0.001965	0.004104	0.002424	0.001599	0.00045	-0.002196	0.00254	0.002475	0.004639	0.001633	0.00414	0.003264	0.001739	INVALID	0.006551	0.003306	-0.000567	0.017654	0.008614	0.00185	0.003908	0.021848	-0.000379	0.025776	0.002663	0.052514	-0.000599	0.004279	0.002145	0.002304	0.004468
B	ArrayStrip	meat juice	79	ELISA pretested	0.013065	0.003748	0.014907	0.003798	0.00496	0.005587	0.006566	0.014705	0.01347	0.068148	0.039385	0.001109	0.001468	0.00332	0.001664	0.046961	0.005551	0.003752	0.003296	0.0002	0.004191	0.002186	0.01096	0.005464	0.001767	0.006101	0.004516	0.012729	0.002644	0.003629	0.008075	0.005966	0.007421	0.001106	0.007105	0.010204	0.005279	0.007362	0.002461	INVALID	0.003962	0.006608	0.000989	0.002056	0.007542
B	ArrayStrip	meat juice	80	ELISA pretested	0.026008	0.042352	0.024828	0.020121	0.013462	0.010292	0.005852	0.054252	0.024964	INVALID	0.051583	0.039321	0.071168	0.003962	0.003972	0.013464	0.003814	0.005357	0.012051	0.008942	0.007918	0.000668	0.006332	0.005418	0.004003	0.01055	0.007005	0.02127	-0.000186	-1.3e-05	0.006058	0.003916	0.027831	0.004671	0.002232	0.006136	0.005849	0.005547	0.011294	0.011811	0.008779	0.004955	0.000659	0.021028	0.001383
B	ArrayStrip	meat juice	81	ELISA pretested	0.01373	0.027462	0.026271	0.018628	0.013181	0.005322	0.014596	0.013869	0.03788	INVALID	0.027542	0.005172	0.00096	0.001377	0.004461	-0.00067	0.005529	0.008236	0.001065	0.001103	0.004458	0.009927	0.000666	0.056904	INVALID	0.005194	0.012372	0.00252	0.001946	0.002016	0.000282	0.00574	0.002654	0.0034	0.004314	0.002807	0.004558	0.003083	0.005275	0.004829	0.001901	0.002812	0.001482	0.004883	0.007702
B	ArrayStrip	meat juice	82	ELISA pretested	0.011627	0.013525	0.019555	0.011585	0.014245	0.010942	0.012719	0.029368	0.015207	INVALID	0.024477	0.000173	0.004662	0.006158	0.007136	0.003944	0.004533	0.003152	0.001503	0.002074	0.002807	0.000236	0.002179	0.00028	0.003519	0.003045	-1.9e-05	0.003316	-0.001713	0.002987	0.002714	-0.002706	0.001421	0.007163	0.002935	0.000752	0.002148	0.008432	-0.000834	-0.003053	0.003482	0.001746	0.000554	INVALID	0.004399
B	ArrayStrip	meat juice	83	ELISA pretested	0.010921	0.010759	0.013476	-0.001116	-0.007712	0.00389	0.00383	0.008998	0.018008	INVALID	0.023928	0.058494	0.007687	0.000432	0.001703	0.098856	INVALID	0.000305	0.039598	0.002427	0.000495	0.004084	0.001918	INVALID	-0.000473	-0.001915	0.007845	-0.002943	0.00269	-0.001543	0.004436	-0.002961	0.008686	INVALID	0.003717	0.040527	0.000107	0.004863	0.000655	INVALID	0.004656	0.014958	-4.7e-05	0.001796	0.005995
B	ArrayStrip	meat juice	84	ELISA pretested	0.00828	0.014501	0.013069	-0.004271	0.007246	0.007515	0.009059	0.020135	0.00811	INVALID	0.018755	0.005629	0.002974	0.003319	0.003116	0.006085	0.002798	-0.002713	0.001163	0.005011	0.00502	0.000674	0.000516	0.000519	0.054527	0.024106	0.001831	0.016049	0.000548	0.002492	0.001093	0.000951	0.001517	0.01066	0.005128	0.01462	0.002028	-0.001859	0.002386	0.01047	0.001378	0.019155	0.003911	-0.000799	0.006189
B	ArrayStrip	meat juice	85	ELISA pretested	0.020567	0.007926	0.024737	INVALID	0.016788	0.008913	0.027366	0.022715	0.021493	INVALID	0.050048	0.001522	0.005037	0.002325	0.000854	-0.000335	0.007418	0.001285	0.004076	0.003912	0.003712	0.003775	0.021095	0.005264	0.001134	0.001573	-0.004842	0.004739	0.013159	0.002805	0.006701	-3.8e-05	0.000418	0.018272	0.000772	-0.000653	0.004578	0.004053	5e-05	0.000221	0.00763	0.008921	0.004093	0.002687	0.00573
B	ArrayStrip	meat juice	86	ELISA pretested	0.024976	0.014099	0.019994	4.8e-05	-0.004652	0.016248	0.025638	0.01033	0.028458	INVALID	0.0297	0.006553	0.003742	0.060293	0.001233	-0.000758	0.003758	-0.000469	0.002441	0.011063	0.003373	-0.002064	0.003329	0.001454	0.052144	0.0027	0.0088	0.002167	0.006597	0.009784	0.004745	0.005949	0.002928	0.001416	-0.000585	3.1e-05	0.005494	-0.002401	-6e-06	0.001666	0.009037	0.004378	0.004067	0.000195	0.00637
B	ArrayStrip	meat juice	87	ELISA pretested	0.017104	0.012332	0.023924	0.027762	0.013252	0.025132	0.021295	0.01389	0.017327	INVALID	0.04394	0.001868	0.002856	0.007939	0.001278	0.000271	0.00205	0.010208	0.007598	0.003534	0.00388	0.012311	0.005225	-0.001011	0.00621	-0.000677	-0.000299	-0.001751	0.006786	0.005706	0.005195	0.000244	0.002687	0.002427	0.002969	0.000827	0.001522	-0.002098	7e-06	0.003243	-0.001465	-0.000596	0.003045	0.001736	0.006655
B	ArrayStrip	meat juice	88	ELISA pretested	0.020317	0.016181	0.016992	0.023166	0.027116	0.025492	0.023012	0.017959	0.026477	INVALID	0.042462	0.002471	0.008979	0.00499	0.009363	0.003836	0.002717	0.010346	0.001934	0.003298	0.00527	0.002385	INVALID	-0.005412	0.006683	0.007436	0.002828	0.010042	0.002809	-0.000838	0.00856	-0.000404	0.004389	0.003207	0.000871	-0.001064	0.00097	0.002118	-0.004691	0.001139	0.010037	0.005	0.003928	0.000815	0.004197
B	ArrayStrip	meat juice	89	ELISA pretested	0.025261	0.033	0.042822	0.044404	0.039277	0.029517	0.04134	0.025451	0.034325	INVALID	0.05887	0.002361	0.003949	-0.001142	0.005265	0.009929	-0.000281	0.01473	0.002714	0.012447	0.001085	0.017203	0.009151	0.00652	0.000298	0.00202	0.004424	-0.002936	0.000709	0.004861	0.008139	0.008853	0.002881	0.0048	0.003801	0.005514	0.003474	0.001005	0.008271	0.002094	0.002931	0.007106	0.000705	0.004587	0.008906
B	ArrayStrip	meat juice	90	ELISA pretested	0.020029	0.023231	0.017834	0.022225	0.000983	0.029654	0.024115	0.014361	0.014574	INVALID	0.034953	0.000781	0.002384	0.003914	0.000137	0.000768	0.002482	0.020545	0.01134	0.001621	0.00465	0.005832	0.001729	0.002732	0.002449	0.003056	-0.000128	0.000481	0.002039	0.001776	0.005173	0.002481	0.001347	-0.001447	0.002199	0.001069	0.002361	0.005047	-0.000302	0.002919	0.004661	0.000556	0.030032	0.002917	0.00533
B	ArrayStrip	meat juice	100	T. gondii positive	0.012403	0.008658	0.049756	0.010056	0.007925	0.023731	0.003491	-0.000512	0.001467	INVALID	0.003511	-0.000483	0.017327	0.058094	0.000537	0.012608	0.004608	0.004059	0.028671	INVALID	INVALID	0.354861	0.006286	0.010657	-0.002832	-0.000889	0.009311	0.002924	0.002099	0.00752	0.002194	0.03053	0.015118	INVALID	0.012498	0.019131	0.01518	0.02628	0.006339	-0.005442	INVALID	0.016687	0.002305	0.004207	0.017197
B	ArrayStrip	meat juice	101	T. gondii positive	0.00315	0.008104	0.006085	-0.007238	-0.002187	0.007536	0.006639	0.006077	0.013401	INVALID	0.014167	0.026814	-0.001091	0.003348	-0.001166	0.005474	INVALID	INVALID	0.000665	0.021208	0.0089	0.010058	0.000687	0.016178	0.003051	6e-05	0.006177	0.004681	0.000626	0.006415	0.001696	0.002976	-0.004031	0.001422	0.003623	0.00551	-0.000294	0.03494	0.000375	0.02885	0.001215	0.007851	0.00104	0.009982	0.002531
B	ArrayStrip	meat juice	102	T. gondii positive	0.010332	0.001281	0.001332	INVALID	0.00061	0.021426	0.011429	0.280407	0.210915	INVALID	INVALID	INVALID	INVALID	-0.001481	0.016008	INVALID	0.006214	0.000793	INVALID	INVALID	INVALID	0.00232	0.017519	INVALID	INVALID	0.031798	0.02201	INVALID	INVALID	0.00165	0.013307	INVALID	0.019295	0.008221	0.130996	INVALID	0.025125	0.005324	0.006704	INVALID	0.141695	0.063037	0.011391	INVALID	0.033232
B	ArrayStrip	meat juice	103	T. gondii positive	0.016151	0.578276	0.663905	INVALID	-0.004059	-0.002807	0.004446	-0.003886	INVALID	0.092747	0.004266	INVALID	0.001015	0.005039	0.00079	INVALID	0.004403	0.00699	0.004863	0.008767	INVALID	0.007827	0.002866	0.288048	0.276771	INVALID	0.00182	0.220199	0.279032	0.480175	0.483721	INVALID	INVALID	0.004506	0.003699	INVALID	INVALID	0.000216	0.003797	0.0237	-0.000676	INVALID	INVALID	INVALID	INVALID
B	ArrayStrip	meat juice	104	T. gondii positive	-0.000465	0.008238	INVALID	INVALID	INVALID	INVALID	0.011248	0.017298	0.041005	INVALID	0.006689	INVALID	0.001927	0.004435	0.002674	INVALID	INVALID	0.029056	0.002347	INVALID	0.004607	0.004776	0.005813	0.000588	-0.00193	INVALID	INVALID	0.011698	0.008278	0.003792	0.006535	0.001523	0.009412	0.002451	0.002526	0.002644	0.002039	0.001748	0.013661	0.0034	INVALID	0.001809	0.001925	INVALID	-0.002027
B	ArrayStrip	meat juice	105	T. gondii positive	NA	NA	NA	NA	NA	NA	NA	NA	NA	NA	NA	NA	NA	NA	NA	NA	NA	NA	NA	NA	NA	NA	NA	NA	NA	NA	NA	NA	NA	NA	NA	NA	NA	NA	NA	NA	NA	NA	NA	NA	NA	NA	NA	NA	NA
B	ArrayStrip	meat juice	106	T. gondii positive	0.008612	0.003122	0.002667	0.010661	0.009161	-0.003586	-0.002601	INVALID	0.003334	0.011121	0.010419	INVALID	0.018903	0.036862	-0.000319	INVALID	0.075486	-0.00021	0.00243	0.008396	0.005821	0.05873	0.000113	INVALID	INVALID	0.004658	0.00391	INVALID	INVALID	0.012843	0.002754	INVALID	0.044556	0.010972	0.002704	INVALID	INVALID	0.005	0.012505	INVALID	0.009898	-0.002678	0.047585	-0.003753	0.004324
B	ArrayStrip	buffer	buffer	buffer	0.002128	0.004061	0.000366	0.000982	0.002515	0.000136	0.002295	-0.001614	0.002231	0.012817	0.00135	0.004417	0.001685	0.000682	0.002246	-0.000345	0.001539	0.006874	0.000608	0.001787	0.00258	0.001379	0.00441	0.001977	0.002289	0.004008	0.000186	-0.000633	0.00338	0.000874	0.001874	0.001152	0.025402	0.000373	0.00183	0.00185	0.000716	0.003105	0.001646	0.001453	0.003437	0.001824	0.000871	0.000931	0.000175
B	ArrayStrip	serum	1	ELISA pretested	0.005723	0.004023	0.016184	0.000814	0.002453	0.001653	0.01733	0.009721	0.018528	0.00973	0.018759	0.027128	0.007347	0.027025	0.001895	0.009336	0.00227	0.008623	0.004396	0.017291	0.002369	0.003386	0.002764	0.003223	0.009905	0.005038	0.000293	0.005815	0.00887	0.002045	0.002236	0.004476	0.006366	0.001926	0.002115	0.022996	0.000289	0.003854	0.01019	0.009376	0.002462	0.001343	0.004571	0.008914	0.003368
B	ArrayStrip	serum	2	ELISA pretested	0.013875	0.012027	0.024657	0.017188	0.016419	0.011873	0.02158	0.026363	0.033563	0.035804	0.037568	0.028674	0.022038	0.015506	0.019102	0.013169	0.002416	0.009166	0.004617	0.002601	0.000984	-0.000118	0.00226	0.001533	0.010102	0.000121	0.001165	0.017332	0.007485	0.000122	0.003326	0.002467	0.012159	0.004124	0.006553	0.023014	0.009549	0.009025	0.017567	0.01899	0.003371	0.003453	0.007664	0.025077	0.009265
B	ArrayStrip	serum	3	ELISA pretested	0.02238	0.023271	0.023759	0.021836	0.019346	0.020329	0.018766	0.033663	0.040509	0.025295	0.046969	0.04599	0.027657	0.033336	0.016839	0.021364	0.012799	0.010321	0.002972	0.01678	0.004499	0.002283	0.002072	0.009071	0.011285	0.000886	0.001036	0.010395	0.011974	0.005152	0.007572	0.012505	0.00753	0.001113	0.014614	0.021505	0.0078	0.012119	0.009747	0.019817	0.005776	0.003925	0.007355	0.021395	0.00764
B	ArrayStrip	serum	4	ELISA pretested	0.009055	0.006912	0.013657	0.008984	0.011654	0.004523	0.006815	0.011262	0.01721	0.023319	0.025967	0.019875	0.025985	0.018349	0.004875	0.010015	0.091485	0.021079	0.013423	0.019313	0.001028	0.006547	0.008444	0.006246	0.010301	0.003135	0.004913	0.006644	0.001904	-0.000261	0.005894	0.012986	0.002282	0.005788	0.009226	0.019504	0.013859	0.015415	0.015915	0.011029	0.006188	0.002803	0.005379	0.013201	0.012197
B	ArrayStrip	serum	5	ELISA pretested	0.007116	0.002652	0.020687	0.007462	0.004035	0.003111	0.005942	0.021006	0.02815	0.015135	0.026313	0.011759	0.003113	0.001361	0.003307	0.006999	0.002438	0.00423	0.003396	0.009219	0.001045	0.000953	0.0031	-0.00017	0.002511	0.000722	0.001911	0.001156	0.003902	0.002671	0.002079	0.000704	0.003756	0.002337	0.002404	0.009845	0.003448	0.002599	0.00539	0.002522	0.000543	-0.000911	0.001709	0.007026	0.001475
B	ArrayStrip	serum	6	ELISA pretested	0.025504	0.01169	0.017876	0.017217	0.010179	0.002871	0.005744	0.013223	0.019291	0.00946	0.014529	0.023743	0.016541	0.012434	0.019281	0.069904	0.013727	0.0053	0.007029	0.013913	0.010742	0.007553	0.00919	0.003211	0.009003	0.006638	0.000779	0.002052	0.007218	0.009214	0.004317	0.008169	0.012533	0.00498	0.005276	0.014947	0.011101	0.002135	0.019576	0.002391	0.004967	0.007999	0.008601	0.010259	0.009016
B	ArrayStrip	serum	7	ELISA pretested	0.017033	0.01327	0.022157	0.014749	0.014231	0.015253	0.011676	0.024715	0.021913	0.020364	0.028728	0.02983	0.015005	0.020993	0.010601	0.001859	0.004461	0.004133	0.00665	0.011307	0.002134	0.006873	0.003211	0.003732	0.005361	0.003067	0.005386	0.0043	0.003931	0.00752	0.007356	0.002858	0.008956	0.00398	0.004969	0.006792	0.005362	0.008046	0.017284	0.002294	0.002301	0.002338	0.005296	0.009039	0.002854
B	ArrayStrip	serum	8	ELISA pretested	0.002812	0.002656	0.007502	0.004087	0.000574	0.000691	0.000626	0.012892	0.010746	0.005305	0.015854	0.024687	0.021213	0.00412	0.004411	0.011291	0.003345	0.002773	0.002719	0.001775	0.00279	0.001735	0.004675	0.003318	0.003171	0.000616	0.004568	0.001375	0.005448	0.000578	0.002599	0.006677	0.00256	-0.000132	0.00402	0.002844	0.009089	0.000655	0.002063	0.002102	0.002016	0.005241	0.004811	0.001243	0.007299
B	ArrayStrip	serum	9	ELISA pretested	0.017351	0.015806	0.05443	0.009889	0.012135	0.011061	0.010874	0.00785	0.00919	0.012656	0.014388	0.008148	0.00812	0.002317	0.013757	0.005011	0.004813	0.000823	0.003885	0.004817	0.003041	0.005271	0.002676	0.004455	0.005503	0.00489	0.002181	0.003304	0.002106	0.00252	0.001872	0.006077	0.005265	0.001053	0.008727	0.01129	0.009901	0.002639	0.014605	0.006095	0.00369	0.006489	0.011666	0.010004	0.009721
B	ArrayStrip	serum	10	ELISA pretested	0.013871	0.01278	0.017305	-0.003846	0.007693	0.000381	0.001252	-0.000173	0.01356	0.011904	0.01242	-0.003699	0.004224	0.000574	0.013825	0.002324	0.00319	0.000732	0.005194	-0.00066	0.003094	-0.001662	0.003741	0.000155	0.002536	0.000439	0.004366	0.003821	0.005329	0.001055	0.006454	0.004246	0.007368	-4.7e-05	0.001038	0.017018	0.004629	0.011776	0.007018	-0.004713	0.002331	-0.00407	0.002897	0.042092	0.002978
B	ArrayStrip	serum	11	ELISA pretested	0.006085	0.017313	0.020147	0.021711	0.000718	-0.000114	0.0043	0.013778	0.013773	0.012714	0.030304	0.026982	-0.006399	0.006417	0.01255	0.003823	-0.003949	0.004877	0.002047	0.006917	0.002967	0.00458	0.003586	0.000372	0.002762	0.001827	0.000813	5.8e-05	-0.001052	0.001211	0.003084	0.003017	0.001732	0.002562	0.003487	0.000385	0.00212	0.001792	0.001822	0.002479	0.002298	-0.000388	0.000259	0.005014	0.000344
B	ArrayStrip	serum	12	ELISA pretested	0.00697	0.006794	0.016126	0.000979	0.008112	-0.001141	0.004397	0.016199	0.017173	0.015809	0.01647	0.012762	0.012857	0.001803	0.004441	0.005111	0.000726	0.00426	0.003641	0.007304	0.003453	0.002335	0.003775	-1e-05	0.001084	0.001707	0.005746	0.002499	0.001889	0.001506	0.002238	0.004417	0.002741	0.003894	0.000951	0.001072	0.00232	-0.000544	0.001398	INVALID	0.000796	0.041565	0.004352	0.004237	0.004486
B	ArrayStrip	serum	13	ELISA pretested	0.022358	0.022848	0.02378	0.023366	0.016336	0.014217	0.012663	0.02917	0.028324	0.03219	0.027382	0.022169	0.021018	0.023147	0.022621	0.011017	0.02488	0.01212	0.009199	0.007167	0.006071	0.003761	0.003637	0.01342	0.009953	0.008968	0.004331	0.012662	0.010138	0.00402	0.002814	0.017511	0.01362	0.008899	0.016996	0.018073	0.008701	-0.002019	0.010124	0.009948	0.007371	0.017407	0.011935	0.01861	0.010129
B	ArrayStrip	serum	14	ELISA pretested	0.030168	0.031072	0.04523	0.043233	0.029392	0.025824	0.036645	0.06145	0.049901	0.051839	0.061887	0.041573	0.025555	0.041618	0.040076	0.04463	0.021099	0.025353	0.014776	0.005408	0.010863	0.020061	0.012301	0.023441	0.035969	0.019433	0.02567	0.018951	0.024601	0.011194	0.026926	0.021257	0.015451	0.009456	0.031505	0.040027	0.029183	0.031595	0.033914	0.017306	0.025441	0.018327	0.029757	0.02735	0.029875
B	ArrayStrip	serum	15	ELISA pretested	0.011031	0.021235	0.023363	0.023205	0.006231	0.006481	0.014065	0.038835	0.020908	0.030532	0.034024	0.0001	0.000288	0.004013	0.000667	0.00087	0.002329	0.000649	0.010891	0.002811	0.000208	0.002062	0.004804	0.001505	-0.000178	-0.000502	0.001785	0.00309	0.002025	0.002433	0.002209	0.001982	0.003267	0.002185	0.003084	0.003109	0.002535	0.001736	0.00159	0.001503	0.00119	0.000839	0.000624	0.001187	0.003276
B	ArrayStrip	serum	16	ELISA pretested	0.003418	0.003271	0.017308	0.011207	0.011791	0.002233	0.001485	0.025626	0.027736	0.010274	0.037439	0.029816	0.011908	0.007695	0.025019	0.017105	0.015351	0.002019	0.000966	0.021882	0.004379	0.002377	0.000881	0.010122	0.019917	0.002313	0.002068	0.00515	0.008447	-2.6e-05	0.003323	0.01696	0.011571	0.003199	0.000709	0.015045	0.016011	-0.001275	0.008984	0.00767	0.005212	0.000866	0.013511	0.012058	0.01688
B	ArrayStrip	serum	17	ELISA pretested	0.00276	-0.000342	0.0096	0.031165	0.008248	0.000726	0.003461	0.020733	0.028813	0.009549	0.015648	0.003497	0.00369	5e-06	0.009218	0.008963	0.012782	0.002513	-0.005637	0.010835	0.003367	0.002317	0.002151	2.8e-05	0.003142	0.001151	0.00328	0.004933	0.001754	0.000211	0.002388	0.004191	0.002287	0.002013	0.000655	0.002066	-6.4e-05	0.002977	0.001185	0.000549	0.001582	0.001459	0.002374	INVALID	0.002314
B	ArrayStrip	serum	18	ELISA pretested	0.002984	0.00091	0.002557	0.002415	-0.000199	0.003133	0.000731	0.004255	0.007783	0.00418	0.003133	0.005028	0.001797	0.001473	0.022028	0.003826	0.002762	-0.000882	0.00126	0.001244	0.002394	-0.001143	0.002685	0.00177	0.001464	0.001043	0.003481	0.001227	0.002069	0.00125	-0.000241	0.002884	0.001898	0.00275	0.002691	-0.000887	0.003994	0.003814	0.001472	0.000768	0.002196	0.008209	-0.000131	0.006731	0.004639
B	ArrayStrip	serum	19	ELISA pretested	0.0076	0.009327	0.01041	0.002736	-0.005415	0.008843	0.001819	0.018878	0.014815	0.011935	0.006569	0.000768	0.002407	5.7e-05	0.00223	-0.000207	0.00302	0.001329	0.002743	0.004654	0.001265	0.00071	0.003086	0.00497	0.001789	0.005501	0.00154	0.01463	0.001633	0.023782	0.006597	0.002906	0.002421	0.012607	0.006338	0.002316	0.000858	0.002621	0.002374	0.001704	0.000681	0.001461	0.004987	0.004892	0.002952
B	ArrayStrip	serum	20	ELISA pretested	0.015482	0.019372	0.019751	0.012716	0.016491	0.020374	0.013471	0.030461	0.030524	0.035013	0.039594	0.029351	0.016508	0.025235	0.015399	0.007568	0.01253	0.015353	0.004414	0.006658	0.002952	0.002016	0.004167	0.001988	0.000374	0.002971	0.003089	0.001831	0.000767	0.001764	0.001922	0.005162	0.001601	-0.000177	0.03497	0.005247	0.001978	0.000497	0.003401	0.00059	0.002733	0.002706	0.002356	0.006851	0.005921
B	ArrayStrip	serum	21	ELISA pretested	0.029979	0.024198	0.035805	0.040626	0.017918	0.025338	0.008976	0.039877	0.044992	0.032713	0.038431	0.030529	0.014892	0.033648	0.017819	0.017974	0.00416	0.007798	0.006055	0.005519	0.004757	0.001459	0.003051	0.008574	0.003904	0.004917	0.018034	0.007331	0.007055	0.000992	-0.000783	0.009959	0.00319	0.002464	0.000743	0.007369	0.000345	0.003648	0.00698	0.009289	0.00128	0.002972	0.002404	0.010642	0.003349
B	ArrayStrip	serum	22	ELISA pretested	0.025645	0.032519	0.026808	0.032854	0.015947	0.022733	0.015649	0.047699	0.046435	0.035237	0.045329	0.019431	0.003965	0.015139	0.008666	0.012657	0.001875	0.000997	0.003012	0.001196	0.002261	0.012118	0.003756	-3.4e-05	0.013644	0.000679	0.00327	0.002495	-0.00068	-0.000509	0.001216	0.004832	-0.000702	0.002635	0.000948	0.001344	0.00401	-0.003131	0.002391	0.00571	0.000639	-0.002216	0.002449	0.010462	0.000995
B	ArrayStrip	serum	23	ELISA pretested	0.029326	0.031334	0.03205	0.035404	0.026021	0.03449	0.021289	0.044197	0.046024	0.051492	0.061129	0.025515	0.010286	0.025425	0.018119	0.010676	0.002187	0.003079	0.002376	0.004795	0.002413	0.000907	0.005144	0.003677	0.002032	0.000744	0.001944	0.002688	0.003667	0.000133	0.006078	0.004004	0.007011	0.002664	0.00121	0.002288	0.002042	0.003179	0.007809	0.002409	0.026934	0.00146	0.006785	0.007519	0.003838
B	ArrayStrip	serum	24	ELISA pretested	0.002056	0.00328	0.002812	0.001468	0.008084	0.000976	0.001208	INVALID	0.013449	0.001327	0.006906	0.023356	0.009084	0.000748	0.001817	0.008501	0.011632	0.000481	0.003831	0.004391	0.004614	0.002748	0.002746	-0.000276	0.006611	0.001607	0.002061	0.003713	0.002371	0.001388	0.000482	0.012411	0.009123	0.007292	0.000328	0.003533	0.005747	0.000159	0.00444	0.003295	0.001586	-0.000908	0.003704	0.012045	0.009069
B	ArrayStrip	serum	25	ELISA pretested	0.002731	0.007467	0.00797	0.005971	0.002079	0.003054	0.00171	0.008014	0.02092	0.005311	0.018303	0.024116	0.006031	0.002781	0.010589	0.011488	0.001713	0.00188	0.001621	0.002632	0.002801	0.001498	0.003205	0.002919	0.000553	0.002836	-0.002154	0.001429	0.08569	0.00397	0.000807	0.002516	0.002613	0.000322	0.000557	0.00624	0.000924	0.005501	0.003757	0.009733	0.002522	-0.000432	0.000345	0.015538	0.004671
B	ArrayStrip	serum	26	ELISA pretested	0.001074	0.002806	0.013931	0.002793	0.002047	0.000467	0.002973	-0.000188	0.009825	0.009165	0.020894	0.013239	-0.000704	0.000456	0.004697	0.005495	0.002206	0.000775	0.001008	0.006696	0.017295	0.000896	0.001045	0.007018	0.005382	0.000193	0.003681	0.003028	0.029519	0.003051	0.000873	0.009075	0.005319	0.002556	0.001563	0.010359	0.001452	0.001202	0.004748	0.005682	0.001944	0.001655	0.001578	0.008743	0.003294
B	ArrayStrip	serum	27	ELISA pretested	0.01159	0.015935	0.033986	0.010006	0.008894	0.003993	0.012402	0.024692	0.02531	0.046569	0.029314	0.051777	0.033671	0.022955	0.033561	0.033761	0.014099	0.014234	0.00985	0.026539	0.038668	0.011493	0.005694	0.009079	0.017068	0.003928	0.003321	0.011252	0.018247	0.001309	0.011367	0.034223	0.022005	0.016594	0.025494	0.044956	0.012192	0.007792	0.03256	0.01945	0.002773	0.007627	0.002598	0.043464	0.014742
B	ArrayStrip	serum	28	ELISA pretested	0.002274	0.007396	0.023911	0.005253	0.002523	0.002401	0.005836	0.047807	0.022304	0.015662	0.021471	0.015982	0.002595	0.00389	0.002956	0.004717	0.004192	0.005203	0.001183	0.001273	0.001194	0.005195	0.001298	0.009037	0.001614	0.001724	0.006219	0.001975	0.013014	0.000257	0.001177	0.002335	-0.00392	0.0008	9.1e-05	0.004553	0.001949	7e-05	0.007448	0.000363	0.003915	0.004661	0.003528	0.010148	0.002656
B	ArrayStrip	serum	29	ELISA pretested	0.001529	1.1e-05	0.015758	0.005359	0.002426	-0.000685	0.006276	0.012776	0.017472	0.00324	0.013392	0.063964	0.014793	0.021192	0.02298	0.012727	0.008854	0.001049	0.010775	-0.001086	0.002979	0.007677	0.001226	0.016507	0.003209	0.001476	0.003134	0.003313	0.002548	0.001431	0.002553	0.011443	0.006958	0.002916	0.000585	0.009326	0.00433	0.001146	0.011344	0.004065	0.043411	0.002928	-0.000931	0.012459	0.000938
B	ArrayStrip	serum	30	ELISA pretested	0.015711	0.016021	0.02416	0.033648	0.020756	0.018014	0.021812	0.042342	0.042529	0.018932	0.072418	0.079481	0.064583	0.051659	0.048047	0.051618	0.046789	0.021731	0.045728	0.03044	0.00953	0.009967	0.012252	0.008746	-0.001778	0.006406	0.004956	0.01954	0.019131	0.010121	0.004979	0.025818	0.02128	0.008098	0.008885	0.028882	0.00793	0.010537	0.023816	0.023293	0.008316	0.005948	0.024435	0.045436	0.020022
B	ArrayStrip	serum	31	ELISA pretested	0.029228	0.025211	0.029608	0.027638	INVALID	0.027039	0.017507	0.042783	0.043939	0.043546	0.049111	0.03081	0.002451	0.01104	0.005628	0.019811	0.006284	0.005192	0.001179	0.011196	0.003423	0.000519	0.005729	0.003485	0.003578	-0.000262	0.000704	0.002265	-0.001495	0.004484	0.006624	0.007662	0.0021	0.001633	0.003533	INVALID	0.006531	0.001887	0.010088	-0.003297	0.000726	0.000266	0.001341	0.006284	0.001146
B	ArrayStrip	serum	32	ELISA pretested	0.01701	0.006646	0.021155	0.023833	0.023248	0.002026	0.001429	0.028281	0.049374	0.021875	0.025412	0.030636	0.019692	0.011626	0.009852	0.019475	0.002852	0.002004	0.002618	0.016822	-0.002358	0.003098	0.000804	0.009646	0.012647	0.006483	0.002602	0.008641	0.010728	0.002974	0.005538	0.01203	0.012164	0.003073	0.001879	0.020673	0.021668	0.000301	0.018801	0.009955	0.003605	0.004272	0.007057	0.018339	0.014223
B	ArrayStrip	serum	33	ELISA pretested	0.003969	0.022223	0.023691	0.039388	0.02508	0.019524	0.021573	0.053628	0.041738	0.035256	0.048529	0.021662	0.005844	0.010147	0.003009	0.002464	0.046211	0.000438	0.005084	0.008572	0.001401	0.002892	0.003317	0.004692	0.006492	0.001069	0.003902	0.007882	0.005012	0.004444	0.001622	0.007795	0.002293	0.002474	0.001624	0.00696	0.003913	0.001067	0.008014	0.005866	0.002047	0.001647	0.005497	0.011281	0.004297
B	ArrayStrip	serum	34	ELISA pretested	0.019163	0.026616	0.023459	0.024903	0.022274	0.01243	0.026094	0.038608	0.05063	0.057147	0.058353	0.012919	0.005166	0.006648	0.004491	0.007714	0.003696	0.00199	0.00128	0.005091	0.003766	0.001216	0.002692	-0.000558	0.004982	0.003395	0.00263	0.004144	0.003662	0.000807	0.000529	0.006133	0.001587	0.002837	-0.000256	0.01289	0.007668	-0.000438	0.005296	0.003369	0.002684	-0.000312	0.001323	0.013765	0.0024
B	ArrayStrip	serum	35	ELISA pretested	0.034386	0.031479	0.037849	0.032888	0.028733	0.009082	0.03472	0.05641	0.047869	0.052666	0.066344	0.024102	0.012817	0.015011	0.015405	0.007213	0.001265	0.002081	0.008713	0.009458	0.002035	0.003734	0.002173	0.010852	0.009275	0.000717	0.003837	0.011348	0.009927	0.005644	0.001944	0.023545	0.013812	0.012182	0.010107	0.014461	0.009875	-0.001211	0.018969	0.012967	0.007816	0.011938	0.006914	0.019614	0.004327
B	ArrayStrip	serum	36	ELISA pretested	0.060171	0.066578	0.060266	0.042293	0.029349	0.026009	0.034294	0.064919	0.056577	0.046277	0.088538	0.042445	0.027228	0.014068	0.02691	0.020872	0.003747	-2.6e-05	0.006361	0.012358	-0.000726	0.000834	0.001104	0.008502	0.007977	0.004514	0.002116	0.010592	0.00711	0.005884	0.004415	0.020427	0.017462	0.007893	0.005418	0.013163	0.005889	0.008406	0.010813	0.003355	0.002829	0.002694	0.002528	0.015423	0.007873
B	ArrayStrip	serum	38	ELISA pretested	0.01417	0.02034	0.013547	0.010523	0.012764	0.010204	0.009441	0.001478	0.016294	0.033323	0.023942	0.011998	0.007013	0.011141	0.010788	0.008994	0.004433	0.006404	0.002268	0.002025	0.003393	0.000737	0.001325	0.0012	0.003108	0.005652	0.006721	0.000931	0.004648	0.000949	0.003715	0.004918	0.009606	0.002303	0.0094	0.038301	0.004479	0.006866	0.010114	0.006341	0.001623	0.000669	0.00189	0.008953	0.005479
B	ArrayStrip	serum	39	ELISA pretested	0.004376	0.003449	0.014065	0.006941	0.000299	-0.001236	0.004747	0.027814	0.026291	0.007051	0.017145	0.007941	0.001821	0.00384	0.001215	0.004759	0.00104	0.00403	0.004241	0.00191	0.000345	0.005308	0.001005	-0.000981	0.000567	0.00163	0.002602	0.002638	0.000646	0.002227	0.005406	0.002267	0.003592	0.000939	0.002956	0.001434	0.001629	0.001308	1.4e-05	0.006539	0.000358	0.000564	0.002933	0.003965	0.004047
B	ArrayStrip	serum	40	ELISA pretested	0.002763	0.001322	0.065794	0.001777	0.001143	0.001225	0.000811	0.004305	0.015514	0.008263	0.007665	0.023057	0.0009	0.002705	0.000364	0.005556	0.004955	0.000985	0.001691	0.003122	0.001423	0.001374	0.000476	0.000852	-0.00014	0.000665	0.00259	0.003954	0.005657	0.005195	0.003831	0.001124	0.00081	0.001676	0.000658	0.000799	0.00164	-0.000282	0.000667	0.002611	0.002011	-0.001142	0.00274	0.005041	0.001162
B	ArrayStrip	serum	41	ELISA pretested	0.002556	0.005232	0.007143	0.013215	0.011825	0.002598	0.002363	0.013308	0.018976	0.004679	0.010157	0.000294	0.001353	0.001699	0.003722	0.003952	0.001159	0.003676	0.001518	0.003487	0.00268	0.003871	0.004439	-0.000379	0.003287	0.003491	0.002337	0.001138	0.021751	0.002763	0.002143	0.002835	0.003423	-0.001137	-0.00019	-0.000347	0.00322	0.001284	0.002932	0.002199	0.002365	0.001148	0.001452	0.001333	0.002747
B	ArrayStrip	serum	42	ELISA pretested	0.001451	0.020166	0.019095	0.01691	0.003341	0.001359	0.003232	0.018433	0.011586	0.007565	0.017468	0.023463	0.042296	0.028053	0.017509	0.025787	0.008432	0.003388	0.011418	0.02595	0.005496	0.001592	0.003142	0.00508	0.001466	-0.000197	0.001974	0.001729	0.001429	0.001439	0.000179	0.013615	0.013718	0.000438	0.002207	0.015354	0.002498	0.003058	0.009946	0.008206	0.002405	0.002345	0.001397	0.008797	0.002861
B	ArrayStrip	serum	43	ELISA pretested	0.004888	0.001983	0.004704	-0.000254	0.002492	0.004317	0.001883	0.002449	0.009663	0.073978	0.015559	0.031655	0.001265	INVALID	-0.002338	0.001424	0.000499	-0.000396	0.008111	0.001342	0.002411	0.005976	0.002654	0.003192	0.0015	0.002923	0.00981	0.003032	0.002261	0.000989	0.001055	0.001679	0.000573	-0.000233	0.001726	-0.000374	0.000193	0.002564	0.001468	0.002617	0.004468	0.002286	0.004345	0.000536	0.003522
B	ArrayStrip	serum	44	ELISA pretested	0.002603	0.004398	0.012948	0.006581	0.00267	0.002638	0.040497	0.014596	0.007967	0.049825	0.019107	0.011474	0.003746	0.003132	0.001852	0.00793	0.012481	-0.000766	0.002146	0.004224	-0.001759	0.002586	0.002041	INVALID	0.005429	0.002017	0.00331	-0.000764	0.005995	0.002867	0.000582	0.006638	0.003739	0.004627	0.000811	0.007717	0.001585	0.003718	0.002416	0.004646	0.000537	0.001813	0.002247	0.003816	0.000827
B	ArrayStrip	serum	45	ELISA pretested	0.003231	0.008335	0.011844	0.004974	0.001975	0.002309	0.000756	0.00969	0.023131	0.018664	0.023358	0.004483	0.003533	0.002203	0.003647	0.004793	0.003075	0.006213	0.000999	0.003741	0.001001	0.002763	0.004639	0.002313	0.003094	0.001042	0.001974	0.001843	0.00139	-0.001044	0.002739	0.01187	0.002054	0.001213	0.003148	0.005129	0.001959	-0.00158	0.001204	0.000796	0.001997	-0.000723	0.000283	0.003695	0.001149
B	ArrayStrip	serum	46	ELISA pretested	0.001644	0.000736	0.000445	0.001516	-0.000894	0.00409	0.002157	0.004857	0.011545	-0.003912	0.012527	0.008185	0.000956	0.000595	0.004959	0.000463	0.002121	0.002299	0.000208	0.004486	0.002474	0.003557	0.001806	0.001258	0.002961	0.00044	0.000214	-0.000646	0.006309	0.000403	0.002176	0.001669	0.001622	0.001213	0.002454	0.003812	0.000964	0.000467	-0.001082	0.001695	0.00202	0.0028	-0.00169	0.000259	0.00413
B	ArrayStrip	serum	47	ELISA pretested	0.001237	0.002397	0.00795	0.06658	0.001801	0.003373	0.000894	0.00917	0.014393	0.000162	0.011184	0.017026	0.003172	0.000898	0.00015	0.004675	0.004792	0.003125	0.001837	0.004716	0.004558	0.000109	0.003802	0.004287	0.001308	0.001722	0.004479	0.002758	-0.00067	-0.001926	0.002528	0.001979	0.001877	0.003093	0.001182	0.007323	0.001701	0.000306	0.001993	0.004509	0.000929	0.000422	-0.000644	0.003253	0.002971
B	ArrayStrip	serum	48	ELISA pretested	0.009399	0.01209	0.024013	0.030259	0.024917	0.011949	0.017629	0.040474	0.043606	0.017782	0.114815	0.034934	0.003356	0.004583	0.000806	0.010576	0.004348	0.002085	0.001697	0.006634	0.001187	0.001814	0.0021	0.005123	0.008369	0.00079	0.000437	-2.5e-05	0.007312	-0.002262	0.026075	0.011166	0.006457	0.019434	-0.001358	0.011208	0.001417	0.00325	0.009119	0.0071	0.00124	0.001462	-0.000511	0.013297	0.002052
B	ArrayStrip	serum	49	ELISA pretested	0.012269	0.015755	0.016311	0.015531	0.020143	0.006362	0.012479	0.024088	0.030005	0.015331	0.01938	0.03925	0.03231	0.028467	0.018579	0.014102	0.024257	0.002214	0.006207	0.027939	0.013922	0.005648	0.006285	0.009052	0.009599	0.013949	0.004128	0.004751	0.027225	-6e-06	-0.000638	0.017863	0.019367	0.006343	0.007155	0.018107	0.019942	0.000632	0.02435	0.014347	0.010249	0.003068	0.016313	0.016793	0.011208
B	ArrayStrip	serum	50	ELISA pretested	0.00194	0.010877	0.014677	0.0043	0.00274	0.001275	0.004076	0.008658	0.016143	0.004066	0.023099	0.007906	0.001114	0.000484	0.010396	0.015705	0.002939	5.8e-05	0.004377	0.001551	0.003068	0.000771	0.001768	0.005035	0.001673	0.002267	0.002513	0.001944	0.005048	0.001873	0.002146	0.002903	0.002409	0.002166	0.000876	0.007071	0.001158	0.003286	0.005675	0.00272	-0.00375	0.001577	0.004571	0.004135	0.002718
B	ArrayStrip	serum	51	ELISA pretested	0.005051	0.004184	0.009506	0.006875	0.008173	0.015152	0.00872	0.018984	0.021056	0.009671	0.022126	0.000686	0.001299	0.001177	0.002978	0.004159	0.000782	0.000922	0.002248	0.0013	0.001445	0.000928	0.00362	0.001116	0.001401	0.001121	0.002061	0.001375	0.00266	0.002741	0.008697	8e-05	0.002813	-0.000239	-0.000732	0.000792	0.002137	-0.001483	0.002223	0.002463	0.00146	0.001646	0.000735	0.002303	0.000759
B	ArrayStrip	serum	52	ELISA pretested	0.014246	0.014685	0.014209	0.004828	0.001672	0.004985	0.005238	0.003339	0.016365	0.013687	0.020911	0.00395	0.001997	0.002215	0.008111	0.002181	0.001564	-0.000199	0.003532	0.001781	0.002474	0.002617	5.5e-05	0.003459	0.000302	0.002947	0.002888	0.00125	0.001381	0.001878	0.002612	0.006547	0.000414	0.000917	0.001569	0.00254	0.002146	0.002135	0.001883	0.004115	0.001974	0.001226	-9.5e-05	0.001819	0.001873
B	ArrayStrip	serum	53	ELISA pretested	0.009675	0.003822	0.00574	0.003115	0.008275	0.007865	0.003306	0.020447	0.011181	0.017163	0.029744	0.001478	0.000694	0.006867	0.000522	0.001401	0.00093	0.001788	0.003898	-0.00132	0.002196	0.000453	0.001788	0.002151	0.000867	0.002411	-0.001667	0.002055	0.000105	0.004859	0.005348	0.001129	-0.000128	0.001021	0.003216	0.001381	0.000299	-0.000293	0.003974	0.002141	0.003243	0.002094	0.002244	0.000215	0.001875
B	ArrayStrip	serum	54	ELISA pretested	0.001597	0.003893	0.01577	0.013951	0.004842	0.002553	0.011422	0.01502	0.016004	0.048943	0.026564	0.014798	0.004014	0.007589	0.007807	0.007439	0.000456	0.007333	-0.000123	0.004684	0.004404	0.000829	0.003106	0.000948	0.002226	-0.000123	0.001626	0.001543	0.000629	0.005264	0.001329	0.000958	0.002906	0.001086	0.005735	0.001533	0.003937	0.003087	0.002338	0.001218	0.001023	0.001045	0.003598	0.005821	0.003228
B	ArrayStrip	serum	55	ELISA pretested	0.008099	0.007555	0.027327	0.005232	0.005406	0.003649	0.009789	0.016497	0.022786	0.011577	0.019343	0.016264	0.000374	0.001905	0.002824	0.007784	-0.000839	-0.000869	0.011841	0.006401	-0.000607	0.002605	0.002177	0.000273	0.000249	0.007855	0.007339	0.004082	0.003835	0.001433	0.000344	0.004331	0.002052	0.001631	0.001787	0.005887	-0.000313	0.00119	0.002069	0.003298	0.003751	0.00166	0.000933	0.00648	0.001848
B	ArrayStrip	serum	56	ELISA pretested	0.004299	0.001752	0.011474	0.007545	0.005151	0.003642	0.007506	0.029574	0.040942	0.013426	0.028794	-0.000387	0.002108	0.003969	-0.000327	0.004869	0.001772	0.00023	-0.000118	0.003803	0.003239	0.001189	0.002667	0.001298	0.005227	0.002969	0.002106	0.002162	0.020236	0.002712	0.00141	0.002071	0.002547	-2.9e-05	0.003118	0.000577	0.002597	0.001414	0.001228	-0.000513	0.001675	0.001561	-0.000229	0.002851	0.001856
B	ArrayStrip	serum	57	ELISA pretested	0.002848	0.007372	0.01557	0.006571	0.001645	0.001819	0.00241	0.006714	0.012006	0.027548	0.011052	0.01494	0.010745	0.004578	0.008961	0.020272	INVALID	0.006234	0.003028	0.009778	0.003798	0.003137	0.0025	INVALID	0.00049	0.007957	0.003055	0.00326	0.003081	0.002623	0.001262	0.015116	0.006376	0.007546	0.002505	0.010258	0.009576	0.001249	0.003163	0.002242	0.00755	0.005251	0.00677	0.006852	0.010921
B	ArrayStrip	serum	58	ELISA pretested	0.014441	0.012224	0.015248	0.001715	0.00725	0.014483	0.006213	0.01824	0.024909	0.017623	0.013287	0.027434	0.04005	0.021367	0.033575	0.021601	0.035106	0.033052	0.026267	0.027233	0.005373	0.027171	0.013406	0.00975	0.014954	0.008948	0.012462	0.014472	0.0117	0.008199	0.010016	0.013069	0.017814	0.017563	0.01411	0.02318	0.023986	0.018061	0.019819	0.012987	0.004316	0.011723	0.012188	0.018932	0.020531
B	ArrayStrip	serum	59	ELISA pretested	0.004659	0.003477	0.000948	0.00658	0.00056	0.00214	0.001297	0.007116	0.00358	0.004263	0.009666	0.000369	0.002373	0.002457	0.004969	0.002195	0.002059	0.004058	0.001341	0.002285	0.003298	-0.00143	0.003277	0.002974	0.000314	-0.000694	0.003212	0.003139	0.001108	0.008233	0.001281	0.001071	0.001809	0.003266	0.000426	0.000744	0.002265	0.002868	0.001211	0.001017	0.005348	0.011559	0.001232	-0.000292	0.004478
B	ArrayStrip	serum	60	ELISA pretested	0.002171	0.002427	0.007299	0.001348	-0.000306	0.003245	-0.000788	0.00837	0.002779	0.01122	0.01482	0.004269	0.002568	0.004409	0.006542	0.00151	0.003199	0.003514	0.00369	0.005459	0.001225	0.005256	0.002673	0.001722	0.000776	0.002435	-0.000805	0.003324	0.00585	0.000263	0.002271	0.00311	0.005131	0.000914	0.002625	0.004916	0.000392	0.001652	0.014703	0.001453	0.001576	0.001897	0.001819	0.00412	0.003455
B	ArrayStrip	serum	61	ELISA pretested	0.010133	0.0178	0.021802	0.014162	0.011779	0.014608	0.030133	0.022512	0.025879	0.031768	0.028032	0.032112	0.009229	0.01151	0.017793	0.015235	0.004911	0.004976	0.004907	0.006103	0.001583	0.001673	0.002826	0.000583	0.004161	0.002338	0.002826	0.002109	0.002889	0.004061	0.002657	0.010595	0.001278	0.002722	0.000428	0.007187	0.000815	0.004048	0.002811	0.007179	-0.000817	0.002724	0.004417	0.012259	-0.000122
B	ArrayStrip	serum	62	ELISA pretested	0.009867	0.005502	0.020354	0.003228	0.001729	-0.000385	-0.001344	0.022625	0.021423	0.020456	0.032976	0.007801	0.002349	0.001092	0.002392	-0.00031	0.003311	0.001572	0.002069	0.001559	0.000407	0.003251	0.003846	0.004915	0.000967	0.003605	0.003147	0.020042	0.000126	0.003639	0.001421	0.001722	0.002819	0.002386	0.004955	0.004602	0.00612	0.002139	0.000204	0.012804	0.025038	0.00273	0.001178	0.002726	0.000646
B	ArrayStrip	serum	63	ELISA pretested	0.016708	0.005264	0.014379	0.011617	0.008641	0.002928	0.001847	0.040966	0.032243	0.042867	0.025187	0.000729	0.002486	0.002333	0.003657	0.000964	0.003789	-0.000542	0.002072	0.003656	0.005481	0.001853	0.003244	0.00341	0.000118	0.001014	0.00039	0.001006	0.003632	0.000433	0.006246	0.001782	0.002014	0.00581	0.005489	0.00038	0.002448	0.001415	0.002979	0.005873	0.001777	0.002222	0.000738	0.010417	0.00262
B	ArrayStrip	serum	64	ELISA pretested	0.003796	0.00244	0.013925	-0.001556	0.005751	0.002571	0.00869	0.008009	0.017886	-0.001794	0.012574	0.003988	0.001658	0.000696	-2.1e-05	0.001823	0.00389	0.002435	0.002489	0.000649	-0.000221	0.000221	0.00243	-0.001962	0.000395	0.002464	0.002213	0.000501	4e-05	0.001758	0.000881	0.004592	0.002282	-0.00031	0.001094	0.003401	0.003578	0.003376	-0.000316	0.000658	0.00415	0.003298	-0.000206	0.000963	-0.000181
B	ArrayStrip	serum	65	ELISA pretested	0.019713	0.024622	0.032568	0.021974	0.024019	0.00839	0.020925	0.030798	0.033913	0.016027	0.034373	0.036777	0.035069	0.034561	0.036588	0.018545	0.023988	0.013735	0.011775	0.023684	0.010833	0.006306	0.005247	0.049578	0.010626	0.012449	0.002669	0.012793	0.008439	0.01557	0.001839	0.022321	0.011894	0.020696	0.010006	0.024063	0.019314	0.01286	0.028252	0.009179	0.016007	0.003685	0.02186	0.020604	0.014409
B	ArrayStrip	serum	66	ELISA pretested	0.001926	-0.004075	0.01755	0.008659	0.003176	0.008719	0.007178	0.021372	0.024883	0.021371	0.025338	0.00409	0.003968	0.001347	0.00948	0.01014	0.000958	0.003161	0.003523	0.003157	0.001568	0.000587	0.001237	0.001826	0.001829	0.001287	0.001393	-0.000348	0.001939	0.002137	0.003479	0.003547	0.000815	0.002499	0.001512	0.000485	0.003059	0.001151	INVALID	-0.001335	-0.001077	0.00239	0.091705	0.008697	0.005573
B	ArrayStrip	serum	67	ELISA pretested	0.014968	0.009383	0.014875	0.011853	0.005266	0.000914	0.010236	0.021753	0.027207	0.024546	0.031141	0.009963	0.003902	0.01373	0.003052	0.006595	0.000214	0.001964	0.000889	0.008272	-0.000566	0.006459	0.00209	0.001929	0.006199	0.001719	0.002917	0.003353	0.004373	0.000861	0.002574	0.002041	0.001479	0.029985	0.001313	0.014475	0.002818	0.004657	0.001907	0.04324	0.000876	-0.000128	INVALID	0.013644	0.002647
B	ArrayStrip	serum	68	ELISA pretested	0.005685	0.008051	0.008162	0.008498	0.001984	0.003108	0.000761	0.010023	0.019786	0.007344	0.022436	0.004748	9.7e-05	0.023523	-0.000107	5.3e-05	0.001876	0.0006	0.001813	0.007688	0.004246	0.003111	0.000313	0.002863	0.002572	0.001838	0.003631	0.038513	0.000524	0.001367	4.8e-05	0.00175	0.000489	0.001329	0.002519	0.004611	0.000984	0.001735	0.001949	0.00328	0.000978	0.004161	0.004654	0.004428	0.001327
B	ArrayStrip	serum	69	ELISA pretested	0.001958	0.003516	0.007755	0.010729	0.002231	0.002044	0.002142	0.005744	0.017924	0.010408	0.008863	0.011356	0.000418	0.002206	0.000377	0.00209	0.004503	0.00297	0.00184	0.002327	0.000621	0.002444	0.002428	0.000891	0.001317	0.002452	0.002906	-0.001626	0.047852	0.002073	0.000286	0.022658	0.002765	0.002389	0.00448	0.002641	0.000431	2.7e-05	0.003879	0.001121	0.002181	0.003717	0.002851	0.001301	0.000763
B	ArrayStrip	serum	70	ELISA pretested	0.00654	0.018125	0.020425	0.008292	0.006471	0.018011	0.003163	0.02014	0.029107	0.022223	0.024722	0.027603	0.008502	0.001054	0.010338	0.005458	0.002291	0.001212	0.003142	0.003038	0.001231	0.003914	0.003869	0.003341	0.005432	0.003037	0.00343	0.010805	0.026887	0.005022	0.000703	0.018635	0.00051	0.001588	0.001647	INVALID	0.003363	0.000766	0.007274	0.004317	0.001098	0.003441	0.002132	0.016228	0.000401
B	ArrayStrip	serum	71	ELISA pretested	0.063319	0.014587	0.010934	0.011111	0.007838	0.006922	0.025046	0.009254	0.022497	0.028497	0.019694	INVALID	0.004433	0.001919	0.003839	0.004562	0.001163	0.001354	0.005296	0.00181	0.00269	0.003813	0.001356	0.002152	0.003726	0.002589	-0.00064	0.008922	0.026346	0.001592	0.001618	0.000158	-0.000546	-0.000635	0.006098	0.008046	0.002864	0.000515	0.006429	0.004439	0.000425	0.000433	0.029023	0.000574	0.003486
B	ArrayStrip	serum	72	ELISA pretested	0.000467	0.007406	0.00337	0.002386	0.000612	0.010804	0.002593	0.003465	0.006828	0.007264	0.005396	0.018286	0.001614	0.001095	0.001953	0.002327	0.001743	0.00283	0.002885	0.01862	-0.000426	-0.0006	0.003494	0.001157	0.00102	0.000961	0.0001	0.004232	0.001887	-0.00192	0.000932	0.000206	0.002825	0.003562	0.001915	0.001703	0.000163	0.002011	0.00108	0.001309	0.003344	-2.6e-05	0.000208	0.002016	0.00171
B	ArrayStrip	serum	74	ELISA pretested	0.00634	0.004459	0.013114	0.005332	0.009673	0.00278	-1.6e-05	0.009803	0.017911	0.006835	0.008833	0.015823	0.018283	0.002028	0.004045	0.020633	0.024334	0.011501	0.002939	0.014692	0.009888	0.002509	0.002384	0.007066	0.013395	0.009871	0.002925	0.007997	0.012812	0.011519	1.2e-05	0.008937	0.008844	0.004341	0.003399	0.015279	0.013276	0.029245	0.019301	0.010477	0.012579	0.001381	0.009701	0.018057	0.016432
B	ArrayStrip	serum	75	ELISA pretested	0.00105	0.006814	0.011727	0.005859	0.005241	0.00274	0.002927	0.013906	0.016289	0.011806	0.018484	0.015006	0.006066	0.000471	0.002295	0.010839	0.00275	0.001666	0.000377	0.008275	0.001528	0.004768	0.001837	0.004729	0.003618	0.004328	0.002706	0.0046	0.00583	0.003278	0.003249	0.006808	0.007174	0.003665	0.002438	0.004817	0.000746	0.001499	0.002775	0.006674	0.00283	0.001054	0.000512	0.010143	0.005003
B	ArrayStrip	serum	76	ELISA pretested	0.041569	0.025432	0.026766	0.024794	0.022461	0.018342	0.026209	0.034166	0.049961	0.040897	0.050828	0.019096	0.077981	0.043328	0.022867	0.012646	INVALID	0.027038	0.022515	0.014729	INVALID	0.015563	0.009597	0.013023	0.009261	0.009517	0.011111	0.014933	0.012997	0.012397	0.014795	0.019617	0.023331	0.021231	0.020369	0.020531	0.016581	0.039942	0.016592	0.0141	0.018407	0.025589	0.009082	0.020291	0.054789
B	ArrayStrip	serum	77	ELISA pretested	0.010935	0.011619	0.023269	0.010342	0.007578	0.006589	0.00571	0.010889	0.025462	0.022869	0.027569	0.006974	0.006494	0.00273	0.002469	0.009757	0.006645	0.003875	0.002683	0.003706	0.001294	0.001761	0.002156	0.002833	0.003612	0.00188	0.001899	0.003853	0.004128	0.001901	0.007566	0.008298	0.0043	0.002432	0.002798	-0.002108	0.004532	0.007555	0.007637	0.003203	0.000902	0.004759	0.003323	0.001705	0.000685
B	ArrayStrip	serum	78	ELISA pretested	0.012793	0.014392	0.013774	0.005337	0.004376	0.007461	0.006257	0.024076	0.013594	0.009943	0.019205	0.021994	0.003677	0.00557	0.038666	0.003106	0.003148	0.002823	0.005916	-0.000864	0.00232	0.00385	0.002146	0.004386	0.003435	0.001644	0.01108	0.004024	0.008437	0.00089	0.002158	0.001294	0.002701	0.000169	-0.000661	0.00192	0.002327	0.001793	0.008678	0.010819	0.000895	0.001241	0.0057	0.013971	0.005981
B	ArrayStrip	serum	79	ELISA pretested	0.0052	0.01877	0.026621	0.001945	0.004631	0.000229	0.003351	0.018942	0.018802	0.045301	0.020982	0.005896	0.002189	0.001425	0.001585	0.010045	0.020066	0.000878	-7.9e-05	0.000765	0.003559	0.008385	0.005378	0.00903	0.016346	0.002014	0.00469	0.00233	5e-05	0.002681	0.002303	0.002129	0.010015	0.002251	0.002042	0.007564	0.002318	0.002398	0.005856	0.004403	0.001628	0.00377	0.002534	0.010705	-0.001707
B	ArrayStrip	serum	80	ELISA pretested	0.024309	0.0336	0.028051	0.026036	0.011917	0.018526	0.020689	0.053993	0.044653	0.048931	0.039682	0.00793	0.004943	0.011999	0.010347	0.000607	0.004176	0.000925	0.014629	0.004558	0.004962	0.000513	0.012227	0.008153	0.006158	0.004449	0.001521	0.008046	0.011509	0.008527	0.002556	0.015007	0.012663	0.007029	0.0028	0.016813	0.00419	0.00319	0.010278	0.009169	0.004439	0.003143	0.007625	0.011104	0.006584
B	ArrayStrip	serum	81	ELISA pretested	0.019246	0.013166	0.017483	0.003118	0.00808	0.005787	0.002182	0.029165	0.03689	0.019696	0.031005	0.004413	0.001239	0.006722	0.001962	0.00335	0.003671	0.008514	0.002056	0.009782	5.7e-05	0.000259	0.001843	0.002058	0.000563	0.000358	0.003833	0.000714	0.004129	0.001338	6.4e-05	0.001184	0.001353	0.002598	0.008155	0.006266	0.001021	0.002848	0.006745	0.001698	0.00119	0.006183	0.001663	0.002244	0.001435
B	ArrayStrip	serum	82	ELISA pretested	0.011772	0.011745	0.017753	0.020208	0.019161	0.002195	0.008218	0.034611	0.024601	0.008892	0.018348	0.016869	0.005775	0.004942	0.007318	0.010261	0.014927	0.001773	0.000482	0.005773	0.003338	0.001791	-8.8e-05	0.005286	0.000717	0.011095	0.001931	0.007937	0.011335	0.003441	9.6e-05	0.008502	0.010517	0.001865	0.003778	0.010004	0.006798	0.004426	0.016261	0.00892	0.003448	-5.3e-05	0.00775	0.009581	0.00695
B	ArrayStrip	serum	83	ELISA pretested	0.008927	0.003191	0.015887	0.005783	0.006063	-0.000143	0.003526	0.022155	0.026828	0.005572	0.021074	0.002771	0.003672	0.004912	0.005192	0.014603	0.001986	0.001382	0.002343	0.003569	0.001581	0.002252	0.001201	0.004919	0.002265	0.001209	0.001513	0.002836	0.001317	0.004331	0.005487	0.003108	0.003414	0.001028	0.000437	0.008691	-0.000137	0.003126	0.00197	0.00309	0.019658	-0.000112	0.003928	0.014843	0.003019
B	ArrayStrip	serum	84	ELISA pretested	0.014748	0.01794	0.02555	0.009378	0.012748	0.008236	0.0089	0.022632	0.018405	0.030629	0.008102	0.034108	0.015027	0.006238	0.013169	0.010732	0.005464	0.005452	0.016905	0.010349	0.00153	-7.3e-05	0.002971	0.003066	0.006135	0.002953	0.007	0.002904	0.008204	0.002464	0.004078	0.004604	0.00062	0.004327	0.013134	0.003173	-0.001642	0.00402	0.010674	0.007664	0.005155	0.002137	0.002988	0.019804	0.002651
B	ArrayStrip	serum	85	ELISA pretested	0.043101	0.044098	0.039924	0.03991	0.040991	0.034141	0.043368	0.041936	0.055585	0.069294	0.068176	0.053016	0.046192	0.039244	0.037368	0.037718	0.013614	0.024315	0.027916	0.023508	0.009051	0.01129	0.008961	0.021046	0.024123	0.005336	0.013907	0.013048	0.020282	0.010334	0.012169	-0.001083	0.020781	0.011094	0.01999	0.030638	0.048856	0.010732	0.028367	0.031536	0.011567	0.00336	0.02128	0.031796	0.015539
B	ArrayStrip	serum	86	ELISA pretested	0.055123	0.042689	0.046587	0.036041	0.035349	0.029308	0.047387	0.050343	0.048619	0.055353	0.062366	0.065588	0.043549	0.05416	0.039938	0.036694	0.023355	0.020514	0.014547	0.012226	0.008033	0.013245	0.013824	0.014766	0.015793	0.01549	0.012321	0.013573	0.008707	0.015721	0.014934	0.014044	0.009926	0.011433	0.01311	0.02126	0.014074	0.012535	0.015366	0.020208	0.01299	0.010752	0.01298	0.029692	0.009998
B	ArrayStrip	serum	87	ELISA pretested	0.030646	0.038166	0.035316	0.031943	0.027338	0.030803	0.04246	0.045929	0.043623	0.06399	0.045825	0.07617	0.0367	0.039865	0.033987	0.020445	0.023271	0.016917	0.01377	0.008457	0.005995	0.005046	0.00844	0.00987	0.005656	0.004521	-0.0013	0.006763	0.016323	0.009216	0.003007	0.008355	0.008312	0.01583	0.002774	0.011887	0.003657	-0.002382	0.013419	0.014836	0.009953	-0.003122	0.01361	0.015321	0.013798
B	ArrayStrip	serum	88	ELISA pretested	0.018712	0.016327	0.019425	0.020233	0.009974	0.02346	0.015412	0.022913	0.032486	0.034164	0.037451	0.015887	0.010171	0.011021	0.011682	0.010572	0.006567	0.00332	0.00077	0.005693	0.001822	0.001284	0.0032	0.007051	0.004911	0.002024	-0.003287	0.002753	0.00291	0.004697	0.000996	0.003249	0.004348	0.002869	-0.000656	0.006014	INVALID	0.003295	0.004396	0.003262	-0.001262	0.00162	0.002044	0.004848	0.001959
B	ArrayStrip	serum	89	ELISA pretested	0.041962	0.035784	0.055867	0.035287	0.023979	0.025719	0.031924	0.052212	0.04904	0.068864	0.052419	0.068167	0.036936	0.053062	0.060106	0.075041	0.034632	0.043455	0.041932	0.035621	0.013322	0.00524	0.004619	0.026833	0.041793	0.012238	0.013984	0.044376	0.033168	0.015205	0.042118	0.021337	0.007979	0.003656	0.011588	0.056997	0.033597	0.026039	0.052351	0.048013	0.018715	0.014327	0.033279	0.038801	0.023746
B	ArrayStrip	serum	90	ELISA pretested	0.003295	0.005769	INVALID	0.010405	0.017115	0.004693	0.00353	0.016011	0.015891	0.003017	0.00831	0.003466	0.002708	0.002979	0.003458	0.009669	0.002382	0.000804	0.000717	0.009897	0.00274	0.006755	0.004611	0.006837	0.003917	-0.005164	0.005965	0.002231	0.003096	0.045521	0.002028	0.008401	0.004567	0.002236	0.002259	0.004555	0.006056	0.002745	0.00945	0.00391	0.0014	0.000734	0.002291	0.01487	0.005045
B	ArrayStrip	serum	107	T. gondii positive	0.004945	0.002543	0.000942	-0.000407	0.002583	0.000895	0.000617	0.004101	0.006537	0.001924	0.008424	0.005138	0.015326	0.000808	0.002241	0.000772	-0.005001	0.002292	0.00116	0.010439	0.004099	0.000772	0.000658	0.002262	-0.000205	0.003213	0.004639	0.01367	0.002401	0.00454	0.003344	0.001819	0.003421	0.001336	0.000994	0.002692	0.001164	0.001007	0.000889	0.001985	0.002388	0.000745	0.000713	-8.7e-05	0.003719
B	ArrayStrip	serum	108	T. gondii positive	0.002055	0.001719	0.005414	0.004944	0.000648	0.001023	0.001566	0.000467	0.005956	0.002151	0.002917	0.026484	0.004237	0.011624	0.009222	0.036616	0.023316	0.004046	0.021242	0.049795	0.014903	0.0112	0.007626	0.010476	0.017185	0.002711	-0.002562	0.007978	0.006159	0.001596	0.010194	0.010517	0.012692	0.000238	0.004452	0.033116	0.018548	0.009021	0.011346	0.020521	0.003919	0.003337	0.003719	0.024736	0.00323
B	ArrayStrip	serum	109	T. gondii positive	0.004109	0.009544	0.023928	0.014209	0.013782	0.002529	0.010976	0.017257	0.031939	0.023952	0.037602	0.022209	0.003005	0.002487	0.001852	0.023556	0.001519	INVALID	0.001941	0.017494	0.002313	-0.000383	0.00488	0.011835	0.008179	0.007304	0.003837	0.008206	0.016055	0.001692	0.001922	0.01496	0.001982	0.00296	0.002615	0.016801	0.004933	0.001112	0.010507	0.007224	0.002121	0.00239	0.002026	0.018923	0.003328
B	ArrayStrip	serum	110	T. gondii positive	0.000539	0.0028	0.004667	-0.006917	-0.000655	0.002728	0.001185	0.020664	0.012975	0.034714	0.019496	0.004476	0.002537	0.003461	0.004054	0.004857	0.001635	0.003176	0.002977	0.001728	0.002183	0.002507	0.002318	0.002856	0.001821	0.002692	0.002275	0.002892	0.001972	0.003694	0.004236	0.000734	0.00262	0.002638	0.003018	0.005295	0.00158	0.003286	0.001718	-0.001398	0.005589	0.002113	0.000647	0.006645	0.001905
B	ArrayStrip	serum	111	T. gondii positive	0.006465	0.002741	0.013066	0.001096	0.002691	-0.000158	0.004604	0.013185	0.011077	0.109504	0.019635	0.010643	0.003816	0.002977	0.001689	0.008422	0.001524	0.006434	0.002455	0.000382	0.002409	0.002987	0.001127	-0.00043	0.00068	0.003159	-0.001741	-0.000783	0.0008	0.000523	0.009206	0.004777	0.00164	0.001907	0.007704	0.003813	0.000993	0.001552	0.005432	0.00511	0.000789	0.001527	0.000513	0.006601	6.5e-05
B	ArrayStrip	serum	112	T. gondii positive	0.000195	0.001713	0.009175	0.014962	0.001697	0.004688	0.000568	0.00593	0.017792	0.023292	0.014031	0.021419	0.006199	0.004707	0.006534	0.018116	0.00114	0.000424	0.00304	0.006899	0.00177	0.000866	0.002109	0.002424	-0.000254	0.000501	0.000972	0.000845	0.004057	0.001527	0.00091	0.003889	4.4e-05	0.001579	0.003361	0.001854	0.000275	0.002795	0.001611	0.002061	0.061044	0.003491	0.002205	0.007023	-0.005228
B	ArrayStrip	serum	113	T. gondii positive	0.001555	0.002024	0.000852	0.001916	0.00096	-0.000665	0.001155	0.001587	0.006606	0.003734	0.003246	0.002935	0.000867	0.00215	-0.000761	0.006388	0.001757	-0.000107	0.002744	0.003714	0.004302	0.002223	0.0004	0.000115	0.00213	-7.7e-05	0.005757	0.004402	0.003362	0.001952	0.004057	0.00285	4.3e-05	0.000891	0.003817	0.002667	0.00277	0.001423	0.000355	0.000939	0.001109	0.001071	-0.00245	0.002454	0.001698
B	ArrayStrip	buffer	buffer	buffer	0.000341	0.001841	0.001684	0.003769	0.001339	0.001002	0.00076	0.002129	0.004194	0.001242	0.000312	0.00165	0.001408	-0.000233	8e-06	0.00216	0.000709	0.000761	0.002721	0.000697	0.004107	0.001584	0.000546	0.001258	0.003284	0.00304	0.001327	0.002205	0.002845	0.002352	0.001699	0.000913	0.00269	0.000349	0.0022	0.001034	0.002809	-0.000848	0.000995	-9.6e-05	-0.012274	0.000655	0.000884	0.001705	0.049136
C	ArrayStrip	meat juice	1	ELISA pretested	0.002183	0.022515	0.00616	0.003836	0.0048	0.004894	0.003252	0.002243	0.00116	INVALID	0.006378	0.000405	0.021917	0.000814	0.001461	-0.000276	0.00094	0.011261	0.004213	0.030598	0.002541	0.011054	INVALID	0.004673	0.004121	0.001735	0.002089	0.001329	-0.002189	0.00417	0.001193	0.002975	INVALID	0.003254	0.002399	0.00205	0.003172	-0.000325	0.006037	0.001344	0.00357	0.001202	0.082515	-0.000184	0.004371
C	ArrayStrip	meat juice	2	ELISA pretested	0.009829	0.040571	0.009089	0.00762	0.015537	0.009252	0.015855	0.01738	0.015633	INVALID	0.018811	0.005213	0.000896	0.005215	0.001219	0.000124	0.004025	0.000728	0.000273	0.001575	0.001327	0.002767	0.001002	0.00327	0.000123	0.003707	0.003479	0.001361	0.001442	0.001873	0.001536	0.001232	0.00146	0.005329	0.0013	-0.000965	0.002309	0.004386	0.000621	0.005145	0.00353	0.002295	0.004024	0.001252	0.003002
C	ArrayStrip	meat juice	3	ELISA pretested	0.01396	0.017951	INVALID	0.020987	0.01873	0.0135	0.018686	0.0278	0.018503	INVALID	0.028598	0.001283	0.000854	-0.000122	0.000652	0.026248	0.003371	0.000847	0.006181	-0.000271	0.002234	0.084997	0.001916	0.002405	-0.003893	0.011445	-0.003107	INVALID	0.002251	0.030522	-0.001072	5.6e-05	0.012748	0.003243	0.000335	0.001364	0.000364	0.016947	0.003728	0.000504	0.027857	0.076056	0.008605	0.00088	0.000936
C	ArrayStrip	meat juice	4	ELISA pretested	0.003127	0.015899	0.012807	0.009683	INVALID	0.019606	0.00905	0.016925	0.001501	INVALID	INVALID	0.006466	0.006338	0.001455	0.005004	-0.001699	INVALID	0.000526	0.002376	0.014876	0.00354	0.003371	0.003205	-0.001959	-0.001935	0.004357	0.001366	0.003485	0.00658	0.005026	0.004135	0.011118	0.00178	0.005915	0.01278	0.002896	0.000691	0.012808	-0.001434	0.006863	0.0131	0.013545	0.000745	0.009304	0.007072
C	ArrayStrip	meat juice	5	ELISA pretested	0.014613	0.013891	0.078695	0.000898	0.001286	0.000313	0.001761	0.023375	0.002875	-0.003754	0.012971	0.012069	0.007241	0.00506	0.003144	0.028705	0.000167	0.007032	0.002729	-0.000135	0.00657	0.003932	0.003786	0.002189	0.024116	0.00084	0.001115	0.003553	INVALID	0.012548	0.002094	0.002576	0.000849	0.001229	0.001326	0.003051	0.005379	0.002009	0.028163	-0.000748	0.000154	0.000995	0.00362	0.002709	0.000742
C	ArrayStrip	meat juice	6	ELISA pretested	0.019836	0.009136	0.005727	0.001468	-0.000879	0.0034	0.017572	0.007482	0.002911	-0.004793	0.004553	0.002911	-0.000176	-0.003901	0.003026	0.002769	0.002254	-0.000729	0.006252	0.002076	0.006779	0.000694	0.001675	0.000752	-0.000694	0.003718	0.000532	INVALID	0.041186	0.000712	0.001429	0.002208	0.004426	0.00524	0.001711	0.001931	-0.00379	-0.000701	0.000313	0.005084	0.000834	0.00553	-0.002148	0.001528	0.002037
C	ArrayStrip	meat juice	7	ELISA pretested	0.007998	0.009262	0.010683	0.01142	0.001026	0.006645	0.005143	0.010658	0.00995	0.036998	0.008581	INVALID	-0.001438	0.010409	0.006078	0.001376	0.000491	0.007757	-0.001302	0.004061	-0.000339	-0.00017	0.001358	0.017838	0.00421	-0.000859	0.038784	0.036052	-0.001129	0.017766	0.002816	0.014002	0.011293	-0.000432	0.003381	0.006315	-0.000103	0.005183	0.006709	0.003628	0.001776	0.008771	0.00303	0.012234	0.002682
C	ArrayStrip	meat juice	8	ELISA pretested	0.015856	0.010094	0.010157	0.005176	0.000791	-0.005122	0.009715	0.015906	0.001216	INVALID	0.014351	0.007735	0.010199	0.007294	0.007199	0.008406	0.008396	0.001421	0.008769	-0.000747	-0.004088	0.018927	0.005485	INVALID	0.000576	0.008522	0.057249	0.008458	0.011961	0.016157	0.008402	0.009196	0.000799	0.000414	0.007666	0.010382	0.038579	0.00074	0.003937	0.004367	0.002145	0.017995	0.000974	0.008357	0.009832
C	ArrayStrip	meat juice	9	ELISA pretested	0.012464	0.01692	0.014964	0.014389	0.013495	0.013945	0.009918	0.031764	0.021496	INVALID	0.149371	0.007887	-7.4e-05	0.004394	0.008638	0.002538	0.0218	0.007135	0.005302	0.009901	INVALID	0.007613	0.000494	0.004747	0.005313	0.001023	0.001886	0.00318	0.001105	0.00633	-0.001345	0.014405	0.008577	0.016374	-0.000891	0.00222	0.007938	0.00053	0.006302	0.004617	0.019814	0.013875	0.016847	0.025903	0.002463
C	ArrayStrip	meat juice	10	ELISA pretested	0.022361	0.033128	0.044917	0.022347	0.02319	0.015595	0.0254	0.03154	0.041467	INVALID	0.032846	0.011097	0.004097	0.001415	0.029357	0.016454	0.009603	0.003506	0.050468	0.013169	0.008564	0.004215	0.064958	0.017465	0.011881	0.015414	0.013539	0.0165	0.019948	0.030944	0.00838	0.019482	0.021886	0.109697	0.015681	0.011469	0.013876	0.012657	0.018236	0.010329	0.015667	0.01153	0.009515	0.016951	0.013275
C	ArrayStrip	meat juice	11	ELISA pretested	0.032383	0.018108	0.015015	0.01468	0.011846	0.016462	0.010542	0.019722	0.040336	INVALID	0.023569	-0.001549	0.00321	0.006898	0.003028	0.002462	0.018107	0.010967	9e-06	0.000445	0.001743	0.000606	INVALID	0.000386	0.041127	INVALID	8.1e-05	0.001476	INVALID	0.002554	0.039107	0.008578	-0.000238	0.004242	0.008923	-0.000651	0.001457	0.001499	0.000788	0.001557	0.0211	0.004747	0.003274	-0.00135	0.009851
C	ArrayStrip	meat juice	12	ELISA pretested	0.005596	0.006033	0.004315	0.002358	0.01895	0.005441	0.001177	0.015127	0.00162	INVALID	0.008876	0.008027	0.002891	0.004221	0.002971	0.002995	0.002706	-0.000483	0.00152	0.001756	0.002604	0.025597	0.028518	0.01534	0.04938	0.002031	0.001884	0.002119	-0.000164	0.001305	0.003916	0.002523	0.003026	0.000617	0.007204	0.002869	0.004595	0.001137	0.002835	-0.00048	0.00143	0.001573	-0.000268	0.002923	0.000595
C	ArrayStrip	meat juice	13	ELISA pretested	0.02192	0.013689	0.021044	0.025737	0.006172	0.005275	0.012808	0.019613	0.024278	INVALID	0.021065	0.003569	0.004683	0.006439	0.005092	0.012778	0.011967	0.052812	0.00447	0.005346	0.004798	0.002588	0.00517	9.3e-05	0.016993	0.007383	0.001737	0.025602	0.011703	0.00433	2.8e-05	0.013039	0.006116	0.007897	0.011822	0.00714	-0.000505	0.001779	0.008382	0.011674	0.009504	0.005547	0.006414	-0.003443	0.00413
C	ArrayStrip	meat juice	14	ELISA pretested	0.02121	0.02181	0.091128	0.038061	0.055019	0.031464	0.034618	0.04861	0.033561	0.000804	0.056183	0.000902	0.001056	0.006674	0.003989	0.001181	0.003175	0.00235	-0.00065	0.004697	0.000984	0.004456	-0.001224	0.002648	0.002988	0.001439	0.006521	0.002176	0.005118	0.005492	0.067973	0.002943	0.00398	0.007188	0.009253	0.003265	0.001432	0.003183	0.003509	0.001491	0.00621	0.002752	0.008271	0.002318	0.014904
C	ArrayStrip	meat juice	15	ELISA pretested	0.016775	0.012363	0.014443	0.054387	0.066599	INVALID	0.048027	0.046574	0.090426	INVALID	0.075467	0.03259	0.001378	0.00943	0.012045	0.009168	-0.00082	0.032071	0.093162	0.00832	INVALID	0.000147	0.01137	0.000113	0.000635	0.010708	0.049865	0.005573	0.008717	0.003797	INVALID	0.004642	INVALID	0.000976	0.005931	0.000876	0.003476	0.016231	0.090864	0.004792	0.005456	0.038643	0.065325	0.062553	0.006399
C	ArrayStrip	meat juice	16	ELISA pretested	0.016779	0.00293	0.015394	0.043874	0.035122	0.053934	0.032824	0.04448	0.082006	0.044658	0.033499	0.002495	0.001352	0.002865	0.003737	0.000747	0.005072	0.004422	0.00521	-0.001402	0.004252	0.005623	0.00389	0.007449	0.012549	0.003128	0.0032	0.011984	0.002732	0.005926	-0.000396	0.003613	0.002117	0.00256	0.000849	0.003557	0.010579	0.003153	0.007016	0.012713	0.01037	0.004157	0.00237	0.003156	0.002112
C	ArrayStrip	meat juice	17	ELISA pretested	0.020939	0.015543	0.019687	0.020234	0.022937	0.021821	0.014728	INVALID	0.030456	0.07629	0.028743	0.000858	0.006312	0.016354	0.002068	0.002099	0.006877	0.005534	0.004945	0.003317	0.008852	-0.001155	0.00319	0.002866	0.00399	0.000424	0.002292	0.006292	0.003739	0.005432	0.001757	0.008056	0.0083	0.003332	0.001808	0.010291	0.007928	0.000584	0.007948	0.006927	-0.000126	0.004141	0.007037	0.012697	0.056626
C	ArrayStrip	meat juice	18	ELISA pretested	0.027408	0.012905	0.01636	0.003756	0.034407	0.031259	0.01277	0.028292	0.023716	INVALID	0.022938	0.011997	0.022059	0.007386	0.021015	0.006557	0.012738	0.00625	0.004941	INVALID	0.001968	-0.004338	0.011102	0.002577	0.001171	0.008678	0.004451	0.003973	INVALID	0.015656	0.027491	0.029221	0.008065	0.013701	INVALID	INVALID	0.001899	INVALID	0.002057	0.001498	0.004009	-0.001934	0.009607	0.018993	0.012451
C	ArrayStrip	meat juice	19	ELISA pretested	0.057541	0.030317	0.016725	0.004232	INVALID	0.000627	0.04086	0.014846	0.043004	INVALID	0.022715	INVALID	0.00649	0.015889	0.001782	0.020439	-0.001111	0.006728	0.007468	0.00291	-0.002954	0.002765	0.009835	0.002351	-0.003298	-0.001133	0.002653	0.001907	0.025559	0.002631	0.000853	0.004612	-0.000309	0.009307	0.000281	-0.002224	0.005848	0.002749	0.002771	-0.001979	0.0094	0.00269	-0.001181	0.000348	0.027117
C	ArrayStrip	meat juice	20	ELISA pretested	0.020911	0.010517	0.017143	0.002922	0.018035	0.023832	0.00936	INVALID	0.024077	0.13133	0.015439	INVALID	0.005983	0.001224	-0.000422	0.003694	0.003243	0.001108	-7.5e-05	-0.000759	0.002901	0.00558	0.000497	INVALID	INVALID	0.001937	0.002744	INVALID	0.01064	-0.001955	5.3e-05	0.00288	0.007081	-0.001221	0.017473	0.001175	-0.001506	0.00251	-0.001083	0.018669	INVALID	0.006411	INVALID	0.005311	0.011703
C	ArrayStrip	meat juice	21	ELISA pretested	0.027812	0.03112	0.020763	0.022412	0.022211	0.021377	0.01855	0.028778	0.033208	0.030136	0.049732	0.056878	0.006938	0.00416	0.004756	0.006768	0.011293	0.004326	0.01223	0.000538	0.00034	0.005487	0.004835	-0.001668	0.006032	0.034349	0.000739	0.001791	0.00337	0.00318	0.00778	-0.001097	0.002209	0.010554	0.004186	0.003537	0.023753	0.002046	0.003873	0.018493	0.010494	0.013514	0.01328	0.034103	0.012891
C	ArrayStrip	meat juice	22	ELISA pretested	0.030461	0.042472	0.017764	0.020393	0.080239	0.039716	0.057367	0.027943	0.070036	0.006978	0.05524	INVALID	INVALID	0.002915	0.016814	INVALID	0.015892	0.01864	0.013638	0.005708	0.014567	0.007783	INVALID	0.005287	INVALID	0.008258	0.024199	0.026383	0.049002	INVALID	0.019265	0.001179	-0.002514	0.006411	0.010535	-0.006302	0.012883	0.007231	INVALID	0.009524	0.006004	0.014594	0.008241	0.006505	0.02729
C	ArrayStrip	meat juice	23	ELISA pretested	0.013083	0.045979	INVALID	0.077603	0.019164	0.006696	0.007565	0.030046	INVALID	0.044375	0.023491	0.056885	0.002812	0.009141	0.000498	0.014459	0.010863	0.005406	0.006779	INVALID	0.018374	0.004956	0.008665	0.005235	INVALID	0.022132	0.017195	INVALID	0.008837	0.005645	0.007423	INVALID	0.008026	0.007512	0.009759	0.03326	-6.3e-05	0.021799	0.016078	0.027324	0.006511	INVALID	0.001362	INVALID	0.017263
C	ArrayStrip	meat juice	24	ELISA pretested	0.084325	0.008601	0.01242	0.02002	0.000973	0.007557	0.004825	0.06286	0.034023	INVALID	0.035006	0.002564	INVALID	0.01681	0.004416	0.013831	0.025379	0.007125	0.063905	0.006549	-0.003336	0.001915	0.007049	0.00327	0.05407	0.003764	0.004085	0.006657	0.004709	-0.000455	0.002781	0.002756	0.003928	0.000617	0.005923	0.006456	0.005313	0.029751	0.0014	0.002602	0.011593	0.000705	-0.000334	0.05525	0.002178
C	ArrayStrip	meat juice	25	ELISA pretested	INVALID	0.013083	0.027844	0.017729	0.017552	0.012946	0.055785	0.033113	0.019676	0.062479	0.035558	0.020848	0.008474	0.003149	0.002902	0.004172	0.003192	0.003311	0.003819	0.00999	0.003849	0.010053	0.011659	0.005034	0.006365	-0.000926	0.002324	0.060368	0.000126	-0.002169	-0.001711	0.006489	0.024093	-0.000292	0.001661	0.016288	0.004972	0.008711	0.000663	0.002207	-0.001126	0.024771	0.005223	0.006203	0.030056
C	ArrayStrip	meat juice	26	ELISA pretested	0.012044	0.014321	0.01467	0.003673	0.016849	INVALID	0.002955	0.079287	0.023007	0.011287	0.027517	0.001155	0.003114	0.003224	INVALID	0.004502	0.004712	0.004175	1e-05	0.001434	0.004099	0.00686	0.004508	0.00139	0.002143	0.006457	0.003174	0.001048	0.015071	-8.4e-05	INVALID	0.003317	0.011248	0.019197	-0.001737	-3.2e-05	0.00336	0.003279	0.000976	0.004479	0.008508	0.00861	INVALID	0.005341	0.00202
C	ArrayStrip	meat juice	27	ELISA pretested	0.037714	0.023988	0.052476	0.025097	0.079793	0.014859	0.04704	0.079368	0.122437	0.176912	0.098016	0.043494	INVALID	0.113786	0.067466	0.03323	0.036203	INVALID	0.006519	0.092425	0.030463	0.016679	INVALID	0.052301	0.074585	0.119209	0.031823	0.006305	INVALID	0.092345	0.019733	INVALID	INVALID	INVALID	0.008981	0.136279	INVALID	0.075292	INVALID	INVALID	INVALID	INVALID	0.190566	0.06111	INVALID
C	ArrayStrip	meat juice	28	ELISA pretested	0.012098	0.014808	0.010349	0.090412	0.018174	0.022208	0.08065	0.013148	-0.001944	0.007622	INVALID	INVALID	0.029252	INVALID	0.006399	0.024516	0.006913	-0.004227	0.020211	-0.003919	0.025088	INVALID	0.003892	0.011823	-0.002907	0.053575	0.100928	INVALID	0.010894	0.012218	0.003538	0.022106	0.003244	0.027367	0.028571	INVALID	-0.00083	0.011596	INVALID	0.033626	0.021323	INVALID	0.005928	0.029468	0.126246
C	ArrayStrip	meat juice	29	ELISA pretested	0.007389	0.006434	0.007199	0.025064	0.007817	0.031401	0.001384	0.005234	0.000867	0.003861	0.012242	0.006261	0.002724	0.008603	0.00563	0.001121	0.012937	0.006177	0.00425	0.000637	0.015293	0.015572	0.006319	0.00167	INVALID	0.021241	0.006609	0.006876	-0.000258	0.003554	0.014122	0.011997	-0.000391	0.004376	1.9e-05	0.002902	INVALID	0.002601	0.002001	0.001792	0.003868	0.00148	0.008543	0.004475	0.009679
C	ArrayStrip	meat juice	30	ELISA pretested	0.006747	0.02661	INVALID	0.03666	0.076623	0.032674	0.0306	0.09963	INVALID	0.059613	0.097243	0.038012	0.016226	0.001588	0.008614	0.01844	0.018984	0.0139	0.011856	0.011084	0.007123	0.005601	-0.000743	0.009825	0.022641	0.007133	0.012509	INVALID	0.049642	0.019875	0.009123	INVALID	0.016017	0.014944	0.020994	0.031973	0.008521	0.013762	0.012928	0.023999	0.010127	0.015443	0.02027	0.003213	0.018179
C	ArrayStrip	meat juice	31	ELISA pretested	0.005448	0.004169	INVALID	0.005919	0.003308	0.00999	0.027516	0.015864	0.039151	0.005233	0.01844	-0.00362	0.002818	0.007519	0.010269	0.001769	0.004024	INVALID	0.008703	INVALID	0.003173	0.005522	0.003931	0.000559	0.04799	0.002328	0.013995	0.002018	0.00426	INVALID	0.009249	0.008599	0.04821	0.009938	0.001362	INVALID	0.001935	0.001842	INVALID	0.010202	0.002156	0.008473	0.008058	0.030422	0.001042
C	ArrayStrip	meat juice	32	ELISA pretested	0.014727	0.031042	0.092953	0.020779	0.081011	0.011034	0.015895	0.015959	0.026587	0.046674	0.023463	INVALID	0.005866	0.104024	-0.011042	0.018839	INVALID	0.04834	0.070401	0.011956	0.029413	0.023509	0.013029	0.004076	INVALID	0.006453	INVALID	0.02348	0.001223	0.066644	0.102617	0.036417	0.026518	-0.009651	0.007837	0.049862	0.019145	0.002053	0.044972	0.015021	0.051017	0.081576	INVALID	INVALID	0.029401
C	ArrayStrip	meat juice	33	ELISA pretested	0.030369	0.028976	0.026183	INVALID	0.005885	0.018638	0.026194	INVALID	0.03827	0.013385	INVALID	0.026167	0.02438	INVALID	0.02843	0.007558	0.00381	0.065197	0.010708	0.047184	INVALID	0.015246	0.002357	0.017633	0.059237	-0.002509	0.021659	-0.002138	-0.001584	0.001492	0.016843	0.018191	0.069933	0.007201	0.001808	-0.004594	0.012585	0.002518	0.085045	0.013398	0.00202	0.092898	0.007143	INVALID	0.056088
C	ArrayStrip	meat juice	34	ELISA pretested	0.009962	0.024416	0.020852	0.019415	0.019635	0.013113	0.006294	0.035757	0.025081	0.014313	0.036311	0.014284	0.010309	0.00126	0.030896	0.004889	0.00023	0.015841	0.007353	0.005279	0.018593	-0.001519	0.002916	-0.001441	0.014094	0.003208	0.003894	-0.002834	0.004093	0.000734	0.00053	0.020523	0.009952	0.005094	0.004199	0.076175	0.016479	-0.000973	0.004936	0.023015	0.004887	0.003617	0.015458	0.016627	0.007952
C	ArrayStrip	meat juice	35	ELISA pretested	0.00622	0.001911	0.012589	0.01027	0.006243	0.007849	0.005679	0.018078	0.017043	0.020954	0.01472	0.004933	-0.002259	0.001581	0.000435	0.004731	0.002929	-0.004363	0.002771	0.012009	0.000591	-0.003649	-0.001179	0.003818	0.011768	0.002709	-0.000493	0.006914	0.004539	2.4e-05	0.002252	0.004101	0.006967	0.002689	0.005171	0.008131	0.003204	-0.002044	-0.000965	0.00208	0.005407	INVALID	0.00396	0.011329	0.012545
C	ArrayStrip	meat juice	36	ELISA pretested	0.011929	0.039593	0.018774	INVALID	0.011281	0.011736	0.066725	0.040181	0.070806	0.032865	0.039491	0.006137	0.002143	0.006545	0.001067	0.006674	0.018597	0.007338	-0.003524	INVALID	0.005991	0.003005	0.173703	0.025693	-0.008258	0.006059	0.015091	0.052575	0.004324	0.00609	0.009073	0.006773	0.00461	-0.000361	0.015772	-0.01171	0.011012	0.029866	0.001177	0.01257	0.008524	0.006724	INVALID	0.008739	0.000719
C	ArrayStrip	meat juice	38	ELISA pretested	0.007216	0.00813	0.008272	0.00665	0.007235	0.001156	0.00338	0.006766	0.009772	0.011649	0.0037	INVALID	0.000613	0.009603	0.001289	0.002021	0.003462	INVALID	0.003116	0.002053	0.025993	0.004078	0.005648	-0.001422	0.002828	0.002248	0.006373	0.073537	0.048448	0.000599	0.000843	INVALID	0.006953	0.006904	0.002345	INVALID	INVALID	0.509613	-0.001687	0.002596	INVALID	0.006359	0.01038	0.002397	0.00369
C	ArrayStrip	meat juice	39	ELISA pretested	0.011265	0.025806	0.001692	0.0162	0.000951	0.013248	0.00126	0.058556	0.048096	0.027586	0.026239	0.004957	0.023923	0.005347	0.006681	0.008469	INVALID	-0.001107	0.020276	0.061816	0.004439	0.002138	0.000726	0.006965	INVALID	INVALID	0.011268	-0.005232	INVALID	0.004049	0.000844	0.003805	0.011252	0.001711	0.006379	0.023946	0.009116	0.003524	INVALID	0.009475	0.015312	0.00235	0.056789	0.009116	0.002986
C	ArrayStrip	meat juice	40	ELISA pretested	0.013636	0.015108	0.018449	0.006878	INVALID	0.015416	0.024567	0.01083	0.017049	0.026207	0.04064	0.005386	0.001434	-0.000338	0.006465	0.024786	0.0043	0.007805	0.007301	0.010374	0.080733	0.000373	0.003285	0.005773	0.00369	INVALID	0.002496	0.02201	0.088981	0.021758	0.002348	0.010711	0.002784	0.055609	0.041373	0.005086	INVALID	INVALID	0.007117	0.000579	0.029424	0.087043	0.00561	0.001331	0.008497
C	ArrayStrip	meat juice	41	ELISA pretested	0.002955	0.433293	INVALID	0.016306	0.008317	INVALID	0.057339	0.077443	0.007169	0.016745	-0.006031	INVALID	0.027688	INVALID	0.005342	-0.001366	0.019504	INVALID	0.057757	-0.004972	0.044979	0.001996	INVALID	INVALID	-0.000782	0.000827	-0.005702	-0.000315	0.023344	0.097508	0.15075	INVALID	0.008268	0.010904	INVALID	INVALID	0.000609	0.163752	0.270535	-0.002388	INVALID	0.004462	0.010605	-0.002123	INVALID
C	ArrayStrip	meat juice	42	ELISA pretested	0.004539	0.005195	INVALID	0.040066	INVALID	0.003807	0.023779	0.032654	0.012687	-0.001416	0.030614	0.000914	0.050283	INVALID	INVALID	INVALID	-0.001456	0.013773	0.000848	0.00099	0.008493	0.012367	0.035728	0.001917	-0.003262	0.028152	0.012628	0.008667	0.005103	0.001137	0.018577	0.002927	0.0024	0.005753	INVALID	INVALID	0.002542	INVALID	0.006169	0.009421	0.003552	0.005519	INVALID	0.00063	-0.001974
C	ArrayStrip	meat juice	43	ELISA pretested	0.003623	INVALID	0.008843	0.009148	0.009065	0.007004	0.005409	0.022241	0.014663	-0.001415	0.0178	0.019946	0.004894	0.002948	0.045852	0.012501	0.002535	0.007721	-9.6e-05	0.004153	0.031838	0.040458	-0.00149	0.002103	INVALID	0.016097	-0.001943	0.001118	0.03475	0.017547	0.010395	INVALID	0.000293	0.003903	0.004289	0.021643	0.004452	0.00445	0.07973	0.001689	0.040669	0.002738	0.00514	0.014144	0.00992
C	ArrayStrip	meat juice	44	ELISA pretested	0.02331	0.022754	0.02228	0.001199	0.012118	0.001083	0.017214	INVALID	0.014434	0.025501	0.026723	0.003977	0.027457	0.002083	0.006536	0.008686	0.000978	0.01257	0.00191	0.02176	0.001602	0.007229	INVALID	0.001213	0.012487	0.024693	0.009324	0.002898	0.007188	0.003988	0.009173	0.000878	0.004007	0.01973	0.006192	0.002476	-0.002877	0.003291	0.000332	0.001606	0.107342	0.001361	0.045566	1.7e-05	-0.002215
C	ArrayStrip	meat juice	45	ELISA pretested	0.012388	0.010947	0.005494	0.01719	0.035478	-0.0009	0.018003	INVALID	0.019686	0.028928	0.02041	-0.003135	-0.002193	0.00051	INVALID	-0.002044	0.012463	0.011246	0.005272	0.002088	INVALID	0.005718	0.141988	0.017801	0.009311	0.003385	0.004608	0.015686	0.03997	0.001614	0.003477	0.020427	0.003867	0.001724	0.00683	INVALID	-0.001162	0.002728	0.002817	0.010326	0.019792	0.004092	0.01673	INVALID	0.102835
C	ArrayStrip	meat juice	46	ELISA pretested	0.007546	0.008058	0.034371	0.000565	0.004562	0.015107	-0.000597	0.02439	0.019637	INVALID	0.027339	0.048247	0.004086	0.008581	0.006378	0.011247	0.012993	0.018883	0.004162	0.020156	0.060946	0.00768	INVALID	0.00805	0.004672	-0.005876	0.001939	0.00616	0.047019	0.116979	0.010246	0.01479	INVALID	0.000666	0.005341	0.001426	0.001026	0.011749	0.007831	INVALID	0.000168	0.034017	0.004038	INVALID	0.012518
C	ArrayStrip	meat juice	47	ELISA pretested	0.011052	0.007752	0.012348	0.007295	0.024031	0.006002	0.007488	0.065671	0.016283	-0.000781	0.005222	-0.000976	INVALID	0.007619	0.003989	0.002949	0.017693	0.002874	-0.001563	0.029921	0.001857	0.006914	-0.003344	0.0032	0.001491	0.087027	0.048109	INVALID	0.003896	-0.003729	0.003209	0.000639	0.005011	0.004177	-0.003847	0.007901	0.004093	-0.000221	0.005455	0.005869	-0.00027	0.005967	-0.005916	-0.000433	0.000816
C	ArrayStrip	meat juice	48	ELISA pretested	0.001344	0.389896	INVALID	0.006021	0.003452	0.008707	0.008239	-0.002082	0.021452	INVALID	0.024409	0.001418	-0.001601	-0.000152	0.055669	0.001932	0.070945	-0.007145	0.005809	-0.007325	-0.001707	-0.004896	0.002018	0.005009	0.001747	-0.002676	-0.003578	0.01127	0.003308	-0.001505	-0.000597	-0.000353	-0.00083	4.6e-05	0.00239	0.001173	0.018559	0.058093	INVALID	0.002553	0.003681	0.003425	0.000383	0.002404	0.001401
C	ArrayStrip	meat juice	49	ELISA pretested	0.013141	0.007655	0.013302	-0.000561	0.002946	-0.009369	0.004318	0.015948	INVALID	0.028967	0.01604	-0.001395	0.001754	0.000804	-0.003563	INVALID	0.004539	0.011045	-0.005226	INVALID	0.014632	0.007709	-0.000203	INVALID	-0.001694	-0.004218	0.002026	INVALID	INVALID	0.563977	0.00094	0.006202	0.013571	-0.005637	0.002376	0.065673	0.001437	0.033827	INVALID	INVALID	0.006829	0.002502	0.003261	INVALID	-0.000921
C	ArrayStrip	meat juice	50	ELISA pretested	0.020106	0.017604	0.027891	0.051912	INVALID	0.036741	0.020499	0.074951	0.120038	INVALID	0.103062	0.0871	0.000662	0.004315	0.019415	0.004808	0.006371	0.055243	0.038107	0.027172	0.010828	0.01246	0.003934	0.004141	0.001325	0.000378	0.006027	0.027778	0.005063	0.030987	0.01763	0.006799	0.012285	INVALID	0.005868	0.002809	0.105483	0.002942	INVALID	0.016279	0.009271	0.012685	0.036195	INVALID	INVALID
C	ArrayStrip	meat juice	51	ELISA pretested	INVALID	0.058488	0.02512	0.035786	0.020018	0.070052	0.036655	0.051699	0.044134	0.021719	0.041699	0.004955	0.002203	0.001839	0.027976	0.073197	-0.004715	0.013338	INVALID	0.003888	0.002812	0.029423	INVALID	0.008535	-0.004337	INVALID	0.006181	0.063718	0.040931	0.004828	0.004135	0.005225	0.006571	0.015703	0.008291	-0.000966	-0.000797	-0.001121	0.006128	INVALID	0.002648	0.046818	-0.00414	0.009139	0.003584
C	ArrayStrip	meat juice	52	ELISA pretested	INVALID	0.01467	0.043596	0.007507	0.014336	0.089391	0.003927	0.019115	0.021196	-0.009795	0.006328	0.002653	0.005914	-0.002633	0.005316	0.002072	0.028353	0.006211	-0.003211	0.044256	0.056573	0.011181	0.014017	0.004513	0.01822	0.003567	-0.001094	0.002082	0.065491	0.020937	0.008419	-0.00309	0.003072	0.008191	0.006352	0.001816	0.001934	-0.001374	0.000856	0.004152	0.00304	0.011203	0.00297	0.003438	0.008666
C	ArrayStrip	meat juice	53	ELISA pretested	0.002929	INVALID	0.057596	0.020562	0.017191	0.025722	0.017193	0.026416	0.018663	0.021215	0.034418	0.015038	0.015352	INVALID	0.148701	0.002314	INVALID	0.050118	-0.004645	0.002789	-0.000326	-0.000668	0.008584	-0.001645	0.003126	0.001815	0.014256	0.007963	0.005824	0.04533	INVALID	0.019099	INVALID	INVALID	-0.001887	0.015247	0.00198	0.004204	INVALID	INVALID	0.031079	0.02565	0.033425	0.000437	0.041019
C	ArrayStrip	meat juice	54	ELISA pretested	0.01	0.006765	0.021232	0.01876	0.004553	0.011288	0.054049	0.035511	0.024391	0.031428	0.043816	0.007907	0.041845	0.025716	0.002967	0.002146	0.003782	0.014819	0.001408	0.004714	0.028407	-0.001516	0.002842	-0.00332	-0.000598	0.00148	-0.001493	0.034334	-0.000546	0.065473	-0.006306	0.001474	INVALID	-0.007311	0.056609	0.003756	0.010073	0.000968	0.005889	0.006115	-0.002239	-0.001266	0.002243	0.000748	0.147926
C	ArrayStrip	meat juice	55	ELISA pretested	0.000192	0.025024	0.008692	0.018674	0.001404	0.021308	0.014866	0.018531	0.015694	0.078241	0.018774	0.069184	0.004697	0.002437	0.016365	0.001892	0.006781	0.009749	-0.003411	INVALID	0.008293	0.008902	0.003943	0.003835	0.00297	0.00783	0.008528	-0.001015	0.039201	-0.003271	0.005388	0.004631	0.003833	INVALID	0.014711	0.000782	0.001642	0.015394	0.015903	0.01434	0.031529	0.003171	-0.001729	0.00626	-0.004643
C	ArrayStrip	meat juice	56	ELISA pretested	0.033304	0.036268	0.019376	0.024397	0.037789	INVALID	0.033891	0.042131	0.039039	0.020103	0.028634	0.005305	-0.00242	0.003525	0.006549	0.002331	0.062441	0.006011	0.001752	0.012254	0.015028	0.000408	-0.002799	INVALID	8.5e-05	0.032318	0.001899	-0.006083	0.006084	-0.004892	0.002193	0.030151	0.006325	0.000708	-0.002177	0.022308	0.005089	0.003283	0.003046	0.001642	0.008222	-0.000667	0.032805	0.009329	0.007068
C	ArrayStrip	meat juice	57	ELISA pretested	0.018897	0.0054	0.020426	0.05619	0.008788	INVALID	0.001808	0.028752	0.027087	-0.000182	0.009122	INVALID	-0.003776	-0.000729	0.004651	0.003084	-0.00177	0.007199	0.074149	0.030117	0.004341	0.018675	0.005816	0.053897	0.014241	0.028417	0.002032	INVALID	0.004742	0.00178	0.026698	INVALID	0.019375	0.030152	0.00422	0.057214	0.002982	0.022055	INVALID	0.019599	0.001229	0.010161	0.012769	INVALID	-0.000448
C	ArrayStrip	meat juice	58	ELISA pretested	0.004582	0.012387	0.010261	0.006881	0.005593	0.004936	0.005429	0.011578	0.000763	0.012924	0.010308	0.003698	0.00202	0.022051	0.00311	0.001301	0.003889	0.003286	0.041666	0.002267	0.019961	0.000206	0.002673	0.002446	0.005029	0.005099	0.003627	0.009919	0.00311	0.054205	0.026352	INVALID	0.00974	0.001348	0.002893	0.014209	0.007866	0.005327	0.006344	0.005792	0.008152	0.002376	0.004264	0.001502	0.003062
C	ArrayStrip	meat juice	59	ELISA pretested	0.007485	0.00907	0.013534	0.001953	0.000559	0.003345	0.008492	INVALID	0.012073	0.012223	0.011631	-0.000752	0.000518	0.014345	0.003987	0.011856	0.005967	0.002166	0.003489	0.003087	0.002795	0.011918	0.003035	-0.000199	0.001744	0.001611	0.007132	0.000552	0.005152	0.002764	0.000557	0.003616	0.086946	0.003839	0.003076	0.001806	0.038908	0.00207	-0.001467	0.003761	0.000759	0.002021	0.003412	0.000837	0.000957
C	ArrayStrip	meat juice	60	ELISA pretested	0.009011	0.010091	0.014643	0.002446	0.013979	0.00315	0.008908	0.013982	0.011284	0.004237	0.010895	-0.001034	0.034658	0.000806	0.001933	0.001211	0.002675	-0.003916	0.002696	0.002807	-0.001376	0.005036	0.00397	0.001253	0.024781	0.004789	-4e-06	INVALID	0.006118	0.003006	0.002177	0.00887	0.002294	0.005775	0.007771	0.004613	0.000328	0.004506	0.04344	0.003442	0.00159	0.004277	0.007603	-0.000173	0.003094
C	ArrayStrip	meat juice	61	ELISA pretested	-0.000749	0.02173	0.005931	0.009225	0.082679	0.0008	0.010108	0.018365	0.019651	0.005253	0.013818	0.010921	INVALID	0.008607	0.000832	0.002335	0.021781	0.030965	INVALID	0.003302	0.004308	0.007307	0.004312	0.005578	0.002175	0.003139	0.014653	-0.001315	INVALID	0.008351	-0.004905	0.002815	0.004061	0.013863	0.000848	0.03037	0.002425	-0.002253	INVALID	0.009982	0.017919	0.003769	0.005339	0.006981	INVALID
C	ArrayStrip	meat juice	62	ELISA pretested	INVALID	0.003713	0.021084	0.006475	0.007984	0.016454	0.005654	0.021895	0.023215	0.01977	0.038868	0.00511	0.00594	0.002569	-0.001219	0.003993	0.020495	0.001502	0.00615	-0.000796	0.00076	0.009275	0.001036	0.000794	0.01021	0.039556	0.021953	0.000186	0.005132	0.013909	0.006159	0.016152	-0.006301	0.004886	-0.000714	0.002143	INVALID	0.012544	0.003506	0.006339	0.009535	-0.002167	0.003451	0.00505	-0.001958
C	ArrayStrip	meat juice	63	ELISA pretested	0.012319	0.01908	0.011202	0.009369	0.016	0.030018	0.009747	0.022029	0.020625	0.028794	0.016182	0.003067	0.003891	0.000611	0.003861	0.001581	0.003191	0.001822	0.002999	-0.000626	0.002309	0.006046	0.001038	0.002401	-0.00299	0.047613	0.008772	0.009774	-0.001405	0.001028	0.032257	0.090288	0.005393	0.034374	0.000426	0.003528	0.005718	0.004134	0.038505	INVALID	0.003549	0.005698	0.000903	0.006573	0.010421
C	ArrayStrip	meat juice	64	ELISA pretested	0.008062	0.006445	0.008466	0.019549	0.035069	0.015536	0.010691	0.026335	0.008713	0.013296	INVALID	0.006821	0.003086	0.004402	0.000479	-0.000826	0.002069	0.001674	-0.000512	0.009318	0.027899	0.002372	0.003551	0.011823	0.002516	0.002558	0.009291	0.034321	0.002401	-0.002565	0.006913	0.003382	0.004918	0.003042	0.050306	0.032843	0.014398	0.009916	0.008709	0.057118	0.006047	0.00206	0.007709	0.026851	INVALID
C	ArrayStrip	meat juice	65	ELISA pretested	0.0149	0.015292	INVALID	0.024504	0.016525	0.045258	0.037279	0.034395	0.089005	0.059385	0.066976	0.007461	0.028738	0.003978	-0.002423	0.007151	0.009826	0.002569	0.003326	0.002523	0.012786	0.007897	0.003469	0.004689	0.001767	0.009741	0.002841	INVALID	0.007642	0.00314	0.002146	0.001097	0.01064	0.00869	0.006779	0.001852	0.006926	0.00269	0.009731	0.057071	0.012859	0.002848	0.011658	INVALID	0.005511
C	ArrayStrip	meat juice	66	ELISA pretested	0.011011	0.008187	0.013322	0.00994	0.004911	0.012662	0.009783	0.004494	0.020382	0.015721	0.023312	0.001345	0.003534	0.005114	0.002612	-0.000341	0.003766	0.010523	0.000678	0.003477	0.003375	0.004037	0.004713	0.001065	-0.011168	0.015724	0.018495	0.000181	0.001354	0.004589	0.006513	0.003712	0.02088	0.020432	0.006665	0.002692	0.004551	0.006112	0.000562	0.00239	0.003441	0.000455	0.005552	0.003238	0.006972
C	ArrayStrip	meat juice	67	ELISA pretested	0.015997	0.015649	0.021097	0.021316	0.028943	0.018696	0.016656	0.040574	0.027915	INVALID	0.089514	0.006279	0.007659	0.021913	0.005423	0.005398	0.006784	0.00567	0.007751	0.003824	0.003013	0.002701	0.003006	0.034221	0.004991	-0.001078	0.009719	-0.005277	-0.000775	0.004782	0.002107	0.002739	0.003838	0.003384	0.004913	0.002622	0.007803	0.005332	0.01236	0.009375	0.012844	0.004635	0.021559	0.013602	0.009926
C	ArrayStrip	meat juice	68	ELISA pretested	0.048344	0.064052	0.039155	0.048811	0.024671	0.022414	0.040193	0.072475	0.075626	0.06315	0.109152	0.022545	0.030986	0.005045	0.017877	0.017483	0.011729	0.025399	INVALID	0.01011	0.008054	0.003987	0.010035	-0.004321	0.013947	INVALID	0.018118	0.004828	0.007945	0.016082	0.014627	0.00726	0.016034	0.007422	0.002723	0.022298	0.010126	0.019959	0.028863	0.019207	0.016508	INVALID	0.034964	0.025207	0.017373
C	ArrayStrip	meat juice	69	ELISA pretested	0.016892	0.022604	0.0977	0.023919	-0.000431	0.003754	0.021537	0.0265	0.010679	INVALID	0.032948	0.028941	0.000931	0.004929	0.003084	0.001281	-0.002148	0.00223	0.009862	-0.00823	0.033235	0.005428	0.020751	-0.0008	0.015752	-0.000717	-0.006655	-0.003674	0.008494	INVALID	0.01025	-0.002758	0.00572	0.005389	0.004085	0.001483	-0.000408	0.019803	0.00342	0.001928	0.003343	0.011644	0.001811	-0.001733	0.009643
C	ArrayStrip	meat juice	70	ELISA pretested	0.003586	0.003651	INVALID	-0.00878	0.027252	0.012347	0.015366	-0.00093	0.022237	0.017797	0.013569	0.003884	0.007336	0.005615	0.004971	-0.001212	0.004259	0.005013	0.003691	INVALID	0.014681	0.001399	0.001204	0.007395	-0.004502	0.007691	0.01036	-0.001562	0.003269	0.009667	0.00214	0.000287	0.007469	INVALID	0.005832	0.001764	0.001471	0.004006	0.006887	0.004785	0.005233	-0.000827	0.00531	0.00918	INVALID
C	ArrayStrip	meat juice	71	ELISA pretested	0.005996	0.013409	0.011141	0.006883	-0.006308	0.010643	0.004937	0.013929	0.014177	INVALID	0.01634	0.006232	-0.002388	0.013053	0.002723	0.007298	0.029506	0.001808	0.00063	-0.000355	0.004797	0.001406	0.004128	0.003186	0.003182	INVALID	0.003295	-0.000901	-0.001737	0.005033	0.000875	0.00684	0.007561	0.001163	0.001503	4.1e-05	0.010029	0.002521	0.003175	0.001208	0.033299	0.025995	0.009399	0.006415	0.003941
C	ArrayStrip	meat juice	72	ELISA pretested	0.010292	0.011204	0.008382	0.001794	-0.000681	0.004517	0.017217	0.007809	0.004725	INVALID	0.011959	0.001413	0.001935	0.002754	0.016541	0.000244	0.000653	0.001535	-0.000923	0.00019	0.001543	0.001415	0.010689	0.030609	0.002164	INVALID	-0.003059	0.000255	0.001209	0.002136	0.005318	0.001907	0.004802	0.005259	0.006573	0.00804	0.009175	0.041216	0.001284	0.000318	0.030565	INVALID	0.002499	0.047107	0.009826
C	ArrayStrip	meat juice	74	ELISA pretested	0.005491	0.006473	0.009197	0.009237	9.7e-05	-0.000594	0.002576	0.012189	0.005999	INVALID	0.00774	0.002496	0.001389	0.003732	0.004407	0.009683	0.002639	0.008849	0.000865	0.00194	0.003226	-0.00213	0.000638	0.001109	0.001045	0.000832	0.003816	0.002248	0.001386	-0.000932	0.002197	0.00651	0.001204	0.002494	0.001807	0.001739	0.005882	0.000933	0.000934	0.004219	0.003737	0.001755	0.000785	-0.000172	0.004474
C	ArrayStrip	meat juice	75	ELISA pretested	0.023898	0.018663	0.026057	0.021501	0.035451	0.003209	0.020369	0.028115	0.035539	INVALID	0.041387	0.011522	0.010441	0.011945	0.002577	0.011776	0.006787	0.008892	0.002597	-0.006486	0.00592	0.012277	0.01756	0.031313	0.08296	0.001575	0.003239	0.012034	0.001115	0.011313	0.0075	-0.001201	0.002823	0.004728	0.007436	0.023826	0.008844	0.010135	0.001725	0.014652	0.013735	0.007808	0.01002	0.014323	0.005978
C	ArrayStrip	meat juice	76	ELISA pretested	0.016557	0.016326	INVALID	0.005974	-0.000343	0.004342	0.002526	0.031219	0.015258	INVALID	0.00741	-0.000758	0.001249	0.00559	0.006817	INVALID	0.003018	0.002382	0.001572	0.006727	0.008047	0.02343	-0.001376	0.003213	INVALID	-0.001286	0.002773	0.016677	0.00292	0.016224	0.004059	0.045549	0.013739	-0.000321	0.000894	-0.001955	0.003755	0.001296	0.001051	-0.002341	0.000249	0.00611	0.003279	INVALID	0.008916
C	ArrayStrip	meat juice	77	ELISA pretested	0.007673	0.005708	0.008684	0.023439	0.044103	0.002247	0.0085	0.010601	0.009169	-0.002624	0.007545	0.004765	0.000231	0.001857	0.04027	0.00099	0.001769	0.000858	0.000554	0.004107	0.001363	-0.001814	0.002036	INVALID	6.1e-05	0.090251	0.001336	-0.00164	0.000279	0.003967	0.002821	0.010067	0.002788	0.00298	0.008368	0.000216	-0.000354	0.003064	0.003423	0.002393	0.00122	0.005005	0.013585	0.002264	INVALID
C	ArrayStrip	meat juice	78	ELISA pretested	INVALID	0.041181	0.01123	0.003544	0.007604	0.015843	0.002602	0.025355	0.009824	-0.005233	0.017069	INVALID	0.00147	0.006879	0.048251	0.026656	0.010169	0.005728	0.01169	INVALID	INVALID	0.002047	0.084309	0.018288	-0.000937	0.019821	0.003345	-0.007369	0.011336	0.020608	0.001627	INVALID	0.058584	INVALID	0.005944	0.010208	0.00321	0.004689	0.006005	0.004681	0.001854	0.004027	-0.000788	0.004738	INVALID
C	ArrayStrip	meat juice	79	ELISA pretested	0.010501	0.002005	INVALID	0.003051	0.008811	0.005348	-0.003125	0.008012	0.067555	0.019851	0.02723	INVALID	0.01243	-0.004165	0.004467	0.000774	0.025879	0.007227	0.017805	INVALID	0.001458	-0.002746	INVALID	0.000348	INVALID	-0.001159	0.001836	0.013831	-0.000265	INVALID	0.021942	0.00381	0.025328	INVALID	0.002317	0.004366	INVALID	0.005316	INVALID	0.005604	-0.001261	0.001299	-0.001822	0.017569	0.051065
C	ArrayStrip	meat juice	80	ELISA pretested	0.004647	0.013155	0.016601	0.018135	-0.006067	0.015589	0.011785	0.012966	0.02573	0.0153	0.000806	-0.000456	0.001306	0.001425	0.002248	0.006165	0.001737	0.005031	0.007677	0.004479	0.004451	0.003827	0.001521	0.006704	0.001657	0.009613	-0.004861	0.002582	0.002792	-0.000345	0.00125	0.001246	0.003455	0.006834	0.005803	0.019463	0.004486	0.003879	-0.000774	0.004005	0.000317	0.00259	0.000998	0.000432	0.003184
C	ArrayStrip	meat juice	81	ELISA pretested	0.010988	INVALID	0.014507	0.009038	INVALID	0.002312	0.025005	0.032748	INVALID	0.01636	0.018911	0.003036	0.002211	0.001597	0.011159	0.014557	0.001313	0.000799	0.012985	0.011794	0.00588	0.002283	0.003587	0.001759	INVALID	0.01231	0.019594	INVALID	0.004119	INVALID	0.000954	-0.001184	0.005563	0.001743	0.009791	0.045486	0.002737	0.002473	0.022435	0.002911	0.002148	0.018634	-0.001243	0.003743	0.010603
C	ArrayStrip	meat juice	82	ELISA pretested	0.028309	0.017534	0.018255	0.045792	0.017633	0.015506	0.017353	0.03101	0.02994	0.025421	0.053485	0.004684	0.001211	0.002059	0.00302	0.000215	0.00315	0.006578	0.002118	0.002389	0.004538	0.004792	0.003055	-0.000171	0.004603	0.001945	0.004031	0.002114	0.005093	0.003234	0.000113	0.002119	0.002143	0.002248	0.007581	0.042299	0.006316	0.002261	0.00249	0.005434	0.005933	0.001784	0.002212	0.000299	0.010426
C	ArrayStrip	meat juice	83	ELISA pretested	0.010722	0.009991	0.00042	0.004729	0.003661	0.007283	0.011491	0.004905	0.01885	0.016195	INVALID	0.0004	0.005569	0.004018	0.001591	0.001871	0.003451	0.000904	0.001007	0.000959	0.00305	0.001993	0.006614	0.006508	0.003244	0.009986	0.00347	INVALID	0.001375	0.004745	0.001798	6.9e-05	0.026376	0.004814	INVALID	0.003004	0.007388	0.002904	0.003343	INVALID	0.003879	0.000261	0.003091	0.006543	0.007707
C	ArrayStrip	meat juice	84	ELISA pretested	-0.000197	INVALID	0.002187	2.2e-05	0.001599	0.003846	0.000857	0.001107	0.014012	0.003522	-0.001178	0.04553	0.00109	0.000282	0.001619	-0.00019	0.002855	0.001726	0.001435	INVALID	0.002671	0.046792	0.012124	0.002335	-0.001973	0.000796	0.001722	INVALID	0.012875	0.002344	-0.000749	0.002757	INVALID	0.013477	0.000245	INVALID	0.00097	0.004779	0.00201	-0.004468	0.000801	0.005254	-0.000112	0.002091	0.003206
C	ArrayStrip	meat juice	85	ELISA pretested	0.011074	0.011722	0.014817	INVALID	0.01023	0.014546	0.011307	0.021299	0.033005	0.035107	INVALID	0.002815	0.002301	0.002708	0.008737	-0.003045	INVALID	0.003543	0.00025	0.006696	0.00285	0.000179	0.00056	0.000883	0.005048	-0.000342	0.001133	0.002447	0.082145	0.012703	0.002564	0.001419	0.00164	0.007065	0.003271	INVALID	0.001517	-0.002264	0.001741	1e-06	0.011258	0.002281	0.003525	-0.001372	0.006221
C	ArrayStrip	meat juice	86	ELISA pretested	0.034474	0.033884	0.012838	0.028692	0.006331	0.035784	0.020647	0.071947	0.092172	0.04528	0.08854	0.014648	INVALID	0.001828	0.013337	0.005981	0.004197	0.006658	0.010939	0.027605	0.003358	0.003844	0.002676	0.00591	INVALID	0.002383	INVALID	-0.005144	0.008073	0.011959	0.009904	0.018415	0.003178	0.013845	0.041074	0.001523	0.003245	0.004196	0.084022	0.018122	0.00414	0.004492	0.007523	0.001378	0.001919
C	ArrayStrip	meat juice	87	ELISA pretested	0.023992	0.025174	0.030084	0.056736	0.055899	0.033156	0.058281	0.119691	0.127546	INVALID	0.139337	0.011925	0.002311	0.003125	0.001116	-0.003912	0.002216	6e-05	0.00048	0.014027	0.004877	0.01039	0.009234	0.001227	0.004875	0.004234	0.001969	0.005046	0.003817	0.009692	0.007151	0.003348	0.000681	0.008077	0.006089	0.012065	0.012173	0.004509	0.002452	0.003414	0.001231	0.003213	0.002493	0.00217	0.007045
C	ArrayStrip	meat juice	88	ELISA pretested	0.007562	0.007337	0.010631	0.003216	-0.000522	0.009679	0.000239	0.008651	0.010102	0.0133	0.008227	0.001303	-0.000473	0.002121	0.002216	0.001638	0.000846	0.000509	-0.000192	0.020539	0.001477	0.005442	0.009624	0.004806	-0.000603	0.000637	0.001948	0.001695	0.012667	0.001499	-0.001009	0.002322	0.002185	-0.006017	0.000813	0.005073	0.002511	7.1e-05	0.002488	0.003638	0.002126	0.002913	0.002319	0.00316	0.000711
C	ArrayStrip	meat juice	89	ELISA pretested	0.013705	0.010565	0.01671	0.004557	0.008867	0.010964	0.015952	0.012118	0.016302	0.014449	0.0258	0.00219	0.00425	0.001937	0.001613	0.00362	0.001886	-0.000251	0.002609	-0.002653	0.003191	-0.000151	0.000938	0.004394	-0.000682	INVALID	-0.00492	-0.000839	-0.00067	0.0012	-0.003392	0.00635	0.001624	0.000788	0.005419	0.001658	0.002716	0.002362	0.002861	0.003618	-0.000237	-0.000254	-0.001349	0.002749	0.001415
C	ArrayStrip	meat juice	90	ELISA pretested	0.015598	0.014511	0.02208	0.018119	0.030499	0.03992	0.023235	0.090085	0.067572	0.057636	0.056696	0.00034	0.001883	0.002152	-0.001905	0.00347	0.003423	0.006238	0.049529	0.004601	0.003433	0.00218	0.075391	0.000177	-0.004412	0.001855	0.00399	0.004145	-6.8e-05	0.001067	0.004811	0.049941	0.000942	0.002834	0.003982	0.002496	-0.001007	0.00232	-0.001859	0.005089	0.003599	0.003895	0.005356	0.000549	0.003968
C	ArrayStrip	meat juice	100	T. gondii positive	0.13687	INVALID	0.055157	0.00345	INVALID	0.19757	INVALID	0.217578	0.063677	INVALID	0.033409	0.22846	0.246335	0.193036	0.017178	0.224442	-0.000658	0.040177	INVALID	0.13802	0.036618	INVALID	0.006619	0.032157	0.012865	INVALID	-0.006272	INVALID	0.097872	0.013566	INVALID	0.196741	INVALID	INVALID	INVALID	INVALID	0.004188	0.018868	INVALID	INVALID	0.292447	0.045189	INVALID	INVALID	0.081501
C	ArrayStrip	meat juice	101	T. gondii positive	-0.00424	-0.002864	INVALID	0.065302	0.019046	0.009525	INVALID	0.309354	0.381956	INVALID	INVALID	0.028097	INVALID	0.003751	INVALID	0.067964	INVALID	0.064019	0.013752	-0.005028	INVALID	0.290582	0.343267	INVALID	0.063576	-0.005297	-0.002899	INVALID	0.003214	INVALID	-0.008584	0.000895	INVALID	-0.004838	0.018231	0.428849	-0.010029	0.383194	0.58122	INVALID	0.02856	0.031822	INVALID	0.751777	0.673746
C	ArrayStrip	meat juice	102	T. gondii positive	INVALID	0.002589	0.036579	0.007427	INVALID	0.002654	0.000713	0.059785	INVALID	0.003838	0.00718	INVALID	0.035649	0.015785	INVALID	0.00537	0.105861	-0.002221	INVALID	0.032052	0.003266	INVALID	-0.000229	0.026569	0.0477	0.011661	-0.004488	0.099283	INVALID	0.014189	-0.002106	INVALID	INVALID	0.011888	INVALID	0.029952	0.066075	0.003155	0.143345	INVALID	INVALID	0.000976	-0.003272	9.8e-05	0.441765
C	ArrayStrip	meat juice	103	T. gondii positive	0.008444	0.027399	-6.6e-05	-0.000156	0.007407	0.009922	0.001446	0.001882	0.03059	INVALID	INVALID	INVALID	0.000443	0.003798	-0.000963	0.008225	0.000893	0.004531	0.000783	-0.002873	0.001359	INVALID	0.018568	INVALID	-0.002945	-0.00268	-0.001148	-0.002218	0.027738	-0.002979	INVALID	0.001655	0.096853	INVALID	0.005637	0.005287	0.003781	0.005356	INVALID	0.001532	-0.002273	0.02142	INVALID	INVALID	0.02858
C	ArrayStrip	meat juice	104	T. gondii positive	0.001001	0.007848	0.003677	0.077607	-0.00102	-0.001306	-0.002221	0.001066	-0.001904	0.004454	0.013276	0.075251	0.01313	0.00013	INVALID	0.005941	0.00099	0.002628	-0.000125	INVALID	0.015625	-0.002052	0.000206	INVALID	0.005044	0.001206	0.004451	0.000364	0.000216	0.003022	-0.000619	INVALID	0.002848	INVALID	0.001402	-0.000482	0.000427	0.002253	INVALID	INVALID	0.045499	-4.9e-05	0.003616	0.011652	-7.8e-05
C	ArrayStrip	meat juice	105	T. gondii positive	INVALID	0.002043	0.010508	0.000403	0.005235	0.00835	0.019055	-0.007104	0.00909	0.00034	0.003678	-0.000287	0.002594	-0.000295	-0.000952	-0.002056	3.1e-05	0.003296	0.004658	INVALID	0.009906	0.000442	0.025676	INVALID	0.08533	0.006099	0.00185	INVALID	INVALID	0.007266	0.009093	0.002225	0.000187	0.00229	0.00151	-0.00147	0.00996	-0.0068	INVALID	0.083522	-0.000527	0.000278	0.004351	INVALID	0.002504
C	ArrayStrip	meat juice	106	T. gondii positive	0.013479	-0.000416	-0.005767	0.003328	-0.000171	0.003832	0.004036	0.487226	0.631939	0.002356	0.74875	-0.00531	-6.7e-05	0.002004	-0.002627	0.020517	-0.001688	0.001821	-0.001294	INVALID	0.001724	0.002853	0.002132	INVALID	-0.001086	-0.004481	0.002086	INVALID	INVALID	-1.5e-05	0.000773	-0.001422	INVALID	7.4e-05	0.000265	INVALID	-0.005024	-0.000148	-0.002964	-0.000183	-0.004607	0.008177	INVALID	0.001911	-0.000131
C	ArrayStrip	buffer	buffer	buffer	0.005251	0.002258	0.005048	0.001264	0.018845	0.001535	0.002779	0.001133	0.004606	0.011979	0.004405	0.000601	0.010708	0.000699	0.004019	-0.00205	0.001234	0.00148	0.00106	-0.003843	0.002181	0.008775	0.000979	0.005661	0.000784	0.000942	0.003417	0.000591	0.000995	0.00168	0.00139	0.00065	0.004306	0.000979	0.002047	-0.000119	0.003284	0.000529	0.001221	0.002314	0.003068	0.003521	0.001931	0.001597	-0.000358
C	ArrayStrip	serum	1	ELISA pretested	0.002598	0.001874	0.00205	0.001858	0.002402	0.000295	0.002139	0.000676	0.060284	-0.00119	0.003658	0.000547	0.000838	0.008506	0.005687	-0.000157	0.005866	0.00061	0.000682	0.004204	0.002054	0.00149	0.000324	0.003437	0.025931	0.002542	0.004717	0.00136	0.004388	0.000587	0.001359	0.001983	0.001464	0.002851	0.00398	0.0035	0.007676	0.005227	0.002386	0.001041	0.003857	-0.000564	0.004585	0.00193	0.002677
C	ArrayStrip	serum	2	ELISA pretested	0.002772	0.004801	0.002505	0.006575	0.00641	0.008924	0.013233	0.007115	0.010456	0.000545	0.008323	0.002203	0.041597	0.002083	0.005087	0.00427	0.001065	0.002123	0.006076	0.004012	0.001117	0.002389	0.002384	0.000733	0.001304	0.000817	-0.002046	0.000709	0.002547	0.001522	0.03466	0.005628	0.006483	0.012782	0.000863	0.00592	-4.3e-05	0.00348	0.00155	0.000418	0.001598	0.005747	0.001063	-0.000829	0.006757
C	ArrayStrip	serum	3	ELISA pretested	0.01468	0.012912	0.007388	0.006287	0.009272	0.017443	0.002227	0.014827	0.002671	-3.6e-05	0.018434	0.007297	0.002388	0.007146	0.002541	0.000569	0.003571	0.00384	0.003939	0.001748	0.003658	0.005888	0.001868	0.000257	0.003846	0.003794	0.001468	0.004955	0.006188	0.002198	0.001462	0.004146	0.010557	-0.002054	0.000981	0.004498	0.005373	0.006115	0.005963	0.003074	0.002221	0.001871	0.002847	0.005578	0.003191
C	ArrayStrip	serum	4	ELISA pretested	0.005286	0.047832	0.001953	0.005475	-0.001099	-0.000896	-0.00045	0.02992	-0.002489	0.005253	0.005936	0.001339	0.007417	0.00482	0.008423	0.001185	0.012116	0.00494	0.007355	0.003035	0.013404	0.006716	0.000982	0.000164	0.002964	0.002965	0.003952	0.007327	0.021295	0.002381	0.004567	0.002926	-0.002279	0.002652	0.00392	0.001408	0.002991	0.004307	0.004314	INVALID	0.002671	0.005649	0.006418	0.090787	0.000375
C	ArrayStrip	serum	5	ELISA pretested	0.006027	0.004015	0.006199	0.002791	0.041383	0.003848	0.001143	0.011564	0.005792	0.011205	0.001974	0.001565	0.006748	0.007184	0.002031	0.004111	0.006588	0.008684	0.006031	0.00663	0.004298	-0.0012	0.068837	-0.003043	0.004371	0.059518	0.002445	0.000442	0.003053	0.001019	0.000211	0.001874	0.003712	0.012796	0.001772	0.003865	0.008377	0.004755	0.001033	0.003343	0.008448	0.006955	0.006221	0.000862	0.003645
C	ArrayStrip	serum	6	ELISA pretested	0.000179	0.00376	0.002726	0.003722	0.034201	-0.000127	0.025577	0.005662	0.011576	0.011916	0.019552	0.002986	0.00577	0.017609	0.000307	0.017397	-0.000548	0.005236	0.011775	0.001984	0.000995	0.015205	0.005848	0.003127	0.000582	0.003433	0.00864	0.002853	0.005519	0.002692	0.00079	0.006289	0.00079	-0.000487	0.006362	0.005583	0.007664	0.066728	0.006139	0.004785	0.001177	0.006537	0.003639	0.003786	0.006561
C	ArrayStrip	serum	7	ELISA pretested	0.00276	0.001381	0.003058	0.003265	0.000937	0.003469	0.001683	5.3e-05	0.099701	0.003814	0.002471	0.002008	0.00037	0.004172	0.000529	0.002248	0.000334	INVALID	0.002307	0.000654	0.001876	0.000853	0.004788	0.003712	0.007216	0.002259	0.005716	-0.000285	0.000204	-0.000428	-0.000796	0.011243	0.00178	0.000675	0.002851	0.007642	0.036234	0.036688	0.002105	0.00134	0.001925	0.000991	0.002171	0.001335	0.006086
C	ArrayStrip	serum	8	ELISA pretested	0.010882	0.013044	0.010431	-0.007068	0.025842	0.0139	0.002341	0.075764	0.072034	0.02699	0.024313	0.01348	0.017095	0.01276	-0.001818	0.013932	-0.002386	0.011254	-0.000733	0.009198	0.010117	0.007319	0.006733	0.007045	0.005883	0.009867	0.005214	0.00155	0.005876	0.000466	0.003216	0.010851	0.00416	0.002698	0.002216	0.010476	0.010233	0.010055	0.013644	0.011918	0.008923	0.006274	0.016399	0.006511	0.006507
C	ArrayStrip	serum	9	ELISA pretested	0.017625	0.015644	0.017798	-0.011328	0.028581	0.01382	0.01789	0.003264	-0.013691	INVALID	0.023748	0.029022	0.038836	0.021513	0.029868	0.019917	-0.0002	0.024442	-0.005203	0.029628	0.039339	0.017552	0.005558	0.01463	0.019602	0.008228	INVALID	0.010467	0.010201	0.008185	INVALID	0.016327	0.008752	0.020943	0.019095	0.028214	0.016289	0.030902	0.029115	0.016922	0.021714	0.018222	0.015794	0.013395	0.015323
C	ArrayStrip	serum	10	ELISA pretested	0.015574	0.002607	0.005972	0.004942	-0.004818	0.001354	0.00203	0.008129	0.008675	0.006877	0.005965	0.022186	0.00041	0.00301	0.001953	0.004301	0.000423	0.004439	0.012879	0.002536	0.004055	0.000895	0.006258	0.001857	0.012964	0.023475	0.002564	0.001129	0.017751	0.00383	0.0034	-0.00165	-0.001468	0.005093	0.001378	0.005522	0.005221	0.003146	0.006245	0.000916	0.005992	0.003046	0.00252	0.014784	0.004037
C	ArrayStrip	serum	11	ELISA pretested	0.010609	INVALID	INVALID	0.020325	-0.012441	0.007126	0.007396	0.097652	0.071099	0.027827	0.022607	0.021234	0.009621	0.014292	0.001579	0.005049	-0.001251	0.004179	0.013988	0.014818	0.013079	0.023163	0.010827	0.009956	0.004095	0.002761	0.002293	-0.004471	0.004213	0.002824	0.009486	-0.004412	0.009397	0.013688	0.007738	0.011709	0.007395	0.009099	0.008027	0.0042	0.00629	0.006771	0.011869	0.012691	INVALID
C	ArrayStrip	serum	12	ELISA pretested	0.009127	0.003019	0.040585	-0.003156	-0.002863	-6.5e-05	0.026416	-0.001443	-0.006315	-0.005798	0.006925	-0.000994	0.003809	-0.002636	0.003179	0.003331	0.004366	0.001072	0.016488	0.000967	0.0016	0.001035	INVALID	0.003032	0.006065	0.005175	INVALID	0.022873	0.003682	0.00543	-0.000318	0.000273	0.005288	0.005403	0.002043	0.004284	0.006599	0.0083	0.006501	0.007269	0.006195	0.004078	0.000194	0.003874	0.001626
C	ArrayStrip	serum	13	ELISA pretested	0.033373	0.03594	0.038179	0.02182	-0.011227	0.026191	0.030814	0.115591	0.048407	-0.005391	0.044245	0.043715	0.059957	0.025656	0.087494	0.034447	0.019483	0.037653	0.045947	0.020157	0.019655	0.017945	0.017378	0.019033	0.03054	0.021623	INVALID	0.011746	0.021969	0.025854	0.020457	0.023832	0.023176	0.030919	0.031996	0.033565	0.029046	0.025333	0.03674	0.02783	0.016031	0.019945	0.029927	0.03507	0.021801
C	ArrayStrip	serum	14	ELISA pretested	0.008135	0.001929	0.004053	0.001961	0.006065	-0.007053	0.004335	0.00176	0.0014	INVALID	0.009278	0.001792	-0.000255	INVALID	0.003384	0.001182	0.006926	INVALID	0.00231	-0.000284	0.002893	0.007738	0.009998	0.003592	-0.000374	0.002558	0.007286	0.012223	0.002412	0.000554	0.002429	0.002113	0.008334	0.002369	0.006375	0.002969	0.01406	-0.00317	0.001578	0.000772	0.035233	0.026943	0.000905	0.00198	-0.000177
C	ArrayStrip	serum	15	ELISA pretested	0.045093	0.031202	0.044184	0.047898	0.037405	0.033314	0.039029	0.038328	0.063866	0.051269	0.072075	0.033834	-0.005882	0.037674	0.029661	0.016836	0.072935	0.01926	0.053686	0.016258	0.017293	0.006815	0.062765	0.009256	0.066995	0.011756	0.007651	0.006739	0.006864	0.009067	0.009376	0.031882	0.015873	0.017949	0.008806	0.033671	0.010302	0.014241	0.01338	0.015086	INVALID	0.016125	0.010675	0.013249	0.005848
C	ArrayStrip	serum	16	ELISA pretested	0.008801	0.022055	0.023066	0.010298	0.010667	0.020232	0.005233	0.002822	0.046548	0.021872	0.031762	0.008746	0.013564	0.008344	0.010761	0.014259	0.010141	0.010359	0.012108	0.009989	0.002494	0.001014	0.002885	0.005033	0.001704	0.006873	0.00216	0.008777	0.002187	0.003953	0.008784	0.009064	0.002765	0.003801	0.002442	0.007918	-0.005321	0.004437	0.024684	0.004799	0.016964	0.006422	0.004721	0.009044	-0.000243
C	ArrayStrip	serum	17	ELISA pretested	0.007142	0.00209	0.000384	0.001804	INVALID	0.005635	9e-06	0.002323	-0.000459	-0.003711	0.001478	0.00121	0.023397	0.002637	-0.003913	0.004424	0.028844	0.006014	0.00261	-0.001032	0.000193	0.002023	0.003578	0.001465	0.000233	0.001829	0.001259	0.002537	0.002404	0.002019	0.003061	9e-05	-0.000922	0.005904	0.000188	0.002997	0.003047	0.000921	0.000873	0.002306	0.004064	INVALID	0.019344	INVALID	0.00284
C	ArrayStrip	serum	18	ELISA pretested	0.000544	0.002126	0.004282	0.0004	-0.005651	0.002651	0.0036	0.001233	-0.003371	0.019279	0.003231	0.001366	0.004624	0.002164	0.002189	0.015157	-0.000949	0.006377	-0.000887	0.00173	0.001286	0.000995	0.002149	0.003094	0.002636	0.001717	-0.000149	0.000464	0.000809	0.002488	0.001305	0.005845	0.008031	0.003112	0.002853	-0.001226	0.000426	0.001133	0.003178	0.002311	0.012776	0.002307	-0.000136	-0.000139	0.003651
C	ArrayStrip	serum	19	ELISA pretested	0.004128	0.004643	0.000281	0.000727	-0.001536	0.001969	0.010229	0.008834	0.003233	0.000937	0.007952	0.001133	0.005556	0.0014	0.002799	0.001615	0.005467	0.002801	0.001067	-0.001361	0.003607	0.000115	0.000203	0.014931	0.000125	0.000981	0.000621	0.001036	0.002273	0.001261	0.001897	0.003802	0.004191	0.002018	0.035983	0.00075	0.002792	0.003447	0.000666	0.002622	0.000955	0.003241	0.000481	0.002073	0.003984
C	ArrayStrip	serum	20	ELISA pretested	0.009938	0.002124	0.002768	0.003592	0.000242	0.001463	0.000354	0.00857	0.004401	0.003232	0.005086	0.003479	0.000602	INVALID	-0.007339	0.001157	0.024599	-0.000177	-0.001337	0.00225	0.00428	-0.00034	0.000913	0.011815	0.001897	0.008234	0.000712	0.031926	0.002378	0.00025	-0.000694	-0.002032	0.010281	0.00223	0.002221	0.005999	0.019183	0.003187	0.001232	0.001213	0.000445	0.000296	-0.007022	0.001537	0.001298
C	ArrayStrip	serum	21	ELISA pretested	0.001855	0.000467	0.002357	0.003851	0.002825	0.002018	0.003038	0.003938	0.004415	0.004632	0.004367	0.002024	0.004928	0.001728	0.001951	0.017811	0.001128	INVALID	0.001874	0.008991	0.090047	0.00451	0.001236	0.001024	0.000131	0.001812	-9.7e-05	0.001078	-0.000876	0.001353	0.003702	0.022007	0.026271	0.002165	0.003019	0.000448	0.002094	0.000909	0.002446	0.001267	0.000612	0.002267	0.000222	0.004776	0.002595
C	ArrayStrip	serum	22	ELISA pretested	0.038149	0.000345	0.010679	0.00341	0.000123	0.015964	0.004763	0.004013	0.008298	-0.00068	0.003975	0.000123	0.000281	0.071201	0.0036	0.004647	INVALID	0.000731	0.001776	0.000219	0	0.001396	0.000126	0.001734	0.002331	0.003632	0.000749	0.006824	INVALID	0.023012	0.001231	0.004449	0.002596	-6e-06	0.002054	-0.003951	INVALID	0.001377	0.000124	0.09659	1e-05	0.005001	0.005607	0.003242	0.002278
C	ArrayStrip	serum	23	ELISA pretested	0.001545	0.001901	0.006495	0.002055	0.004835	0.001968	0.002387	0.017824	0.004255	0.031368	0.00202	0.002852	0.001119	0.003374	0.001812	0.001311	0.018636	0.013525	0.000901	0.000747	0.001475	0.000991	-0.000259	0.000546	0.000793	0.003138	0.000762	0.002007	0.001379	0.006785	0.001541	0.000621	0.003028	0.00155	-0.000102	0.002429	0.00368	0.000668	0.003003	-0.000219	0.000302	0.002767	0.011437	0.000623	0.000609
C	ArrayStrip	serum	24	ELISA pretested	0.000949	0.000534	0.001164	0.001772	0.001615	0.004048	0.001605	-0.000687	-0.000707	0.002113	0.002632	0.00231	0.002162	0.002985	0.001059	0.001149	0.004036	0.000405	0.001134	0.00131	0.005958	0.002937	0.010564	0.001615	0.00499	0.005019	0.00394	0.000156	0.003847	0.001619	0.000293	0.006401	0.001802	0.007883	0.002136	0.001244	0.001148	0.008908	0.014014	0.003198	0.001517	0.000693	-0.001123	0.003311	0.003254
C	ArrayStrip	serum	25	ELISA pretested	0.009628	0.008939	0.008102	0.006722	0.005098	0.003804	0.009306	0.010972	0.011043	0.012136	0.014012	0.011871	0.0258	0.01418	0.008071	0.000659	0.012729	0.005341	0.000176	0.005264	0.007712	0.013147	0.010559	0.010606	0.008569	0.011573	0.002971	0.006589	0.004123	0.011035	0.004537	0.01791	0.008761	0.048853	0.006042	0.005781	0.012058	0.010963	0.013503	0.007731	0.065519	0.010539	0.007534	0.009071	0.009017
C	ArrayStrip	serum	26	ELISA pretested	0.001923	0.003583	0.001807	0.028249	0.002831	0.001119	0.001865	-0.000793	0.011479	0.002009	0.004804	0.001089	0.000943	-0.000709	0.002477	INVALID	0.001883	0.005539	0.002338	INVALID	0.000731	0.004155	0.003324	0.001445	0.003719	0.001581	0.003176	0.001369	0.00188	0.000832	0.000723	0.019643	-0.000511	0.005572	0.000789	0.005011	0.002389	0.005624	-0.002945	0.001317	0.003617	0.000267	0.003718	0.002474	0.002876
C	ArrayStrip	serum	27	ELISA pretested	0.003127	0.006553	0.004575	-0.000428	0.027555	0.008559	0.002332	0.008593	0.01097	-0.004228	0.010021	0.017363	0.008205	0.002326	0.010334	0.016474	0.005948	0.010038	0.002549	0.002977	0.00586	0.004467	0.006739	0.008952	0.010669	0.002983	0.003055	0.004242	0.005314	0.001771	0.002624	0.008945	0.003609	0.009971	0.01411	0.010543	0.012265	0.006364	0.006186	0.014276	INVALID	0.003253	0.006343	0.013287	0.007119
C	ArrayStrip	serum	28	ELISA pretested	0.008081	-0.001399	0.001423	0.0011	0.000387	0.002603	0.014181	0.000882	0.004668	0.00192	0.00508	-0.003598	0.00819	0.001983	0.002929	0.002041	0.000688	0.002342	0.006098	-0.001128	0.003229	0.004566	0.001789	0.002082	-0.00015	0.000146	-0.000824	0.002199	0.003185	0.001023	0.001744	0.002189	0.004398	0.002737	0.002731	0.001948	0.004148	-0.000975	0.002464	0.002635	0.000351	0.000893	0.001687	0.002482	-0.000834
C	ArrayStrip	serum	29	ELISA pretested	-0.002655	0.001059	0.001524	0.003105	0.001988	0.003658	0.001143	0.001339	0.005189	0.006308	0.000912	0.00093	0.002059	0.013498	0.000901	0.004263	0.003674	0.003127	0.002465	INVALID	0.00206	0.008813	0.002198	0.002946	0.002034	0.001883	0.00168	0.001877	0.00604	0.001102	0.00185	0.000479	0.000429	0.002531	0.001358	0.000255	0.000409	0.004199	0.004077	0.004918	-3.3e-05	0.004264	0.003241	0.001804	0.001894
C	ArrayStrip	serum	30	ELISA pretested	0.003703	0.00175	0.002745	0.000873	0.010473	0.000451	0.002794	0.000658	0.005654	0.001878	0.00139	0.000936	0.00053	0.002312	0.002714	0.000654	0.002258	0.001964	0.031882	0.002477	0.0426	0.001283	0.024737	0.003343	0.000442	0.000977	0.008721	0.002018	0.002145	0.002707	0.013778	0.00163	0.013235	0.003233	0.000793	0.043371	0.001912	0.003121	0.004655	0.000907	0.004832	0.000584	0.005127	0.000634	0.004312
C	ArrayStrip	serum	31	ELISA pretested	0.002924	0.006163	0.003931	0.010086	-0.005404	0.006502	-0.000299	0.007254	0.012666	0.010154	0.010096	-0.000128	0.004279	-0.001871	0.001132	-0.001272	0.007495	-0.001794	0.000966	0.001668	0.001522	0.005167	0.001626	0.001704	0.005313	0.008786	-0.0009	0.004909	0.001893	0.008394	0.00156	0.006503	0.002043	0.003784	0.003277	0.002432	0.009914	0.00323	0.005535	0.004128	0.004237	0.003213	0.001323	0.004477	0.005353
C	ArrayStrip	serum	32	ELISA pretested	0.009787	0.005886	0.017524	0.015823	0.02261	-0.010191	0.009004	0.022032	0.026289	0.025448	0.021168	0.010428	0.004273	0.001086	0.005774	0.00399	0.002246	0.003315	0.002204	0.000639	0.000805	0.005963	0.003556	INVALID	0.00293	-0.0003	0.005728	0.000642	0.00318	0.002316	0.001748	0.015738	0.0055	0.002066	0.006653	0.003536	0.010495	0.002103	0.001403	0.007621	0.007461	-0.000707	0.005171	0.007777	0.006804
C	ArrayStrip	serum	33	ELISA pretested	0.01837	0.017972	0.015697	0.01627	0.007325	0.013281	0.005293	0.034434	0.029967	0.027962	0.038215	0.005512	0.000732	0.007707	0.008173	0.013186	0.004693	0.001766	0.001482	0.004547	0.007597	0.002887	0.003462	0.001039	0.002764	0.000303	0.001467	0.006798	0.005022	0.005425	0.009414	0.006488	0.008428	0.038851	0.004369	0.011887	-0.009205	0.00152	0.000596	0.004124	-0.009816	0.001748	0.001783	0.002122	0.003429
C	ArrayStrip	serum	34	ELISA pretested	0.009691	0.00707	0.020735	0.015804	0.014193	0.026941	0.008729	0.021354	0.020036	0.027549	0.012368	0.002215	0.008503	-3e-06	0.007068	0.001723	0.089701	0.092084	0.017464	0.005982	0.000763	0.002129	0.061363	0.008537	0.001816	0.001816	0.080454	0.086782	0.005064	0.00047	0.004776	0.002381	0.008292	0.003171	0.002121	0.008625	0.005318	0.00256	0.002207	0.007353	0.027114	0.007018	0.00768	0.013871	0.004527
C	ArrayStrip	serum	35	ELISA pretested	0.031907	0.047368	0.046916	0.024634	0.021653	0.031732	0.039922	0.047832	0.049495	0.041768	0.050593	0.031308	0.032994	0.028342	0.020624	0.013143	0.02074	0.021861	0.006587	0.016508	0.014715	0.005391	0.011595	0.014397	0.108678	0.016727	0.069697	0.011299	0.015076	0.01498	0.005846	0.024818	0.023141	0.020635	0.036349	0.021739	0.008422	0.019552	0.021119	0.012166	0.016849	0.017221	0.020732	0.021298	0.016876
C	ArrayStrip	serum	36	ELISA pretested	0.043801	0.041216	0.05026	0.018115	0.020217	0.036568	0.022878	0.059815	0.063171	0.06768	0.068639	0.032713	0.014222	0.016644	0.026964	0.008457	0.010773	0.009947	0.01996	0.005548	0.018491	0.006084	0.010519	0.016567	0.027045	0.013648	0.023805	0.009405	0.008419	0.007777	0.022556	0.02209	0.021535	0.015211	0.025535	0.008613	0.022608	0.014896	0.01713	0.031281	0.006593	0.019597	0.010879	0.014698	0.00991
C	ArrayStrip	serum	38	ELISA pretested	0.006934	0.012078	0.006412	0.008247	0.007976	0.003146	0.000834	0.009777	INVALID	-0.008705	0.017451	0.004685	0.006436	0.006563	-0.001139	0.012518	0.011816	0.003573	0.001363	0.00534	0.001625	0.00107	0.002061	0.004793	0.003327	INVALID	0.004579	0.000264	0.003558	0.001429	0.001516	0.017159	0.009151	0.081452	0.002014	0.000888	0.004112	0.00358	0.007743	0.001894	0.002882	0.006136	INVALID	0.003019	0.006666
C	ArrayStrip	serum	39	ELISA pretested	0.033426	0.019958	0.032762	0.032949	INVALID	0.037505	0.030436	0.047983	0.041128	0.027374	0.052273	0.028269	0.030109	0.041262	0.029792	0.034977	0.020612	0.01966	0.002234	0.017883	0.021867	0.020497	INVALID	0.026819	0.025266	0.022424	0.020461	0.027123	0.024666	0.027926	0.040994	0.035514	0.022137	0.030933	0.033056	0.040986	0.022736	0.035085	0.046276	0.026579	0.023695	0.025644	0.023048	0.040994	0.025147
C	ArrayStrip	serum	40	ELISA pretested	0.000373	0.00487	0.00626	0.005422	0.002207	0.00452	0.001756	0.006651	0.010527	0.008313	0.006429	0.000587	0.002467	0.093837	0.002057	0.001385	0.003541	-0.003051	0.004477	-0.012117	-0.001272	0.003161	0.001377	0.006379	0.001293	0.002116	0.002858	0.004547	0.005843	0.001577	0.007027	0.004577	0.004546	0.001627	0.002721	0.002185	0.002836	0.005165	0.002613	0.003136	0.003868	0.00453	0.004637	0.001398	0.003071
C	ArrayStrip	serum	41	ELISA pretested	0.002429	0.005201	0.001826	0.002557	-1.2e-05	0.022328	0.056476	0.007972	0.03055	0.006799	0.005483	0.005808	0.001235	0.002085	0.001521	-0.000717	0.021102	0.002298	0.003406	0.002089	0.001351	-0.004597	0.001859	0.003016	-0.002797	0.002313	0.004343	0.014923	0.001778	0.007573	0.002874	0.041737	0.005209	0.001201	0.002179	0.001562	0.000428	0.004257	0.002193	0.000658	0.031207	0.013032	0.004989	0.005672	0.002559
C	ArrayStrip	serum	42	ELISA pretested	0.013453	0.013744	0.020719	0.003738	0.00241	0.001466	0.001481	0.003271	0.012242	0.005147	0.013098	0.003419	0.011044	0.019773	0.013905	0.024211	0.01275	0.058734	0.018571	0.016297	0.020659	0.0107	0.015982	0.01498	INVALID	0.018164	0.02557	0.019939	0.012798	0.022203	0.019209	0.012809	0.023181	0.023904	0.020001	0.021332	0.021036	0.016527	0.044256	0.020665	0.01876	0.016972	0.018289	0.014815	0.01588
C	ArrayStrip	serum	43	ELISA pretested	0.003886	-0.000889	0.004511	0.000747	0.001507	0.007069	0.009643	0.00159	0.00179	0.018593	0.002223	0.004611	0.0033	0.001596	0.00248	0.002115	0.002352	0.000821	0.003025	0.010518	0.003423	-0.001242	0.001774	-0.000224	-0.000935	0.002061	0.000401	0.003501	0.002904	0.00217	0.002555	0.001129	0.000921	0.002228	0.001499	0.054403	0.002638	0.00212	0.004949	0.000415	0.067446	0.002532	0.002521	0.003005	0.005631
C	ArrayStrip	serum	44	ELISA pretested	0.020619	0.023222	0.014324	0.018542	0.012074	-0.005525	0.010044	0.017118	0.020506	0.025564	0.022455	0.017448	0.017398	0.017461	0.023854	0.011558	0.017622	0.007537	0.006009	0.010302	0.00268	-0.002237	0.011737	0.003605	0.007478	0.008207	0.008405	0.009477	0.006474	0.006635	0.006417	0.009786	0.007593	0.016851	0.006078	0.009636	0.008058	0.006295	0.020924	0.010955	INVALID	0.00276	0.015233	0.013067	0.010855
C	ArrayStrip	serum	45	ELISA pretested	0.017923	0.017331	0.01825	0.00631	0.010803	0.011516	0.009637	0.023428	0.015968	0.041399	0.024738	0.001583	0.00543	-0.001165	0.012162	0.006677	0.036243	0.008059	0.008641	0.000506	0.004842	0.003407	0.005986	0.002555	0.004013	0.002872	INVALID	-0.001486	0.001602	0.005544	0.006017	0.002562	0.009003	0.002959	0.003486	0.001919	0.007284	INVALID	0.008898	0.002625	INVALID	-0.00065	0.01009	0.004728	0.005423
C	ArrayStrip	serum	46	ELISA pretested	0.004941	-0.001241	0.005924	0.002921	0.005153	0.015582	0.006474	0.008885	0.022291	INVALID	0.005893	0.006516	0.001014	0.004308	0.007487	0.024705	0.036971	0.004499	0.01547	-0.000483	0.0017	0.004304	0.002127	0.001001	0.003783	0.012069	0.005315	0.002329	0.001829	0.001583	0.001347	0.003329	0.001824	0.00093	0.001783	INVALID	0.003825	0.000812	0.0069	0.00406	INVALID	0.053523	0.005567	0.001632	0.0013
C	ArrayStrip	serum	47	ELISA pretested	0.008135	0.001929	0.004053	0.001961	0.006065	-0.007053	0.004335	0.00176	0.0014	INVALID	0.009278	0.001792	-0.000255	INVALID	0.003384	0.001182	0.006926	INVALID	0.00231	-0.000284	0.002893	0.007738	0.009998	0.003592	-0.000374	0.002558	0.007286	0.012223	0.002412	0.000554	0.002429	0.002113	0.008334	0.002369	0.006375	0.002969	0.01406	-0.00317	0.001578	0.000772	0.035233	0.026943	0.000905	0.00198	-0.000177
C	ArrayStrip	serum	48	ELISA pretested	0.003773	0.001358	0.001182	0.001336	INVALID	0.000392	0.000831	-0.001373	0.005522	0.003428	0.00317	-0.000295	0.001943	0.008358	0.007457	0.010221	0.003011	-0.000436	-0.002585	0.011704	0.003166	0.000294	0.001468	0.00164	0.002303	0.005385	0.00381	0.001037	0.002034	0.001891	0.003093	0.000757	0.003733	0.00338	0.001842	0.000736	0.001795	0.001966	0.006846	0.002466	0.000114	0.002826	0.003962	0.004553	0.001835
C	ArrayStrip	serum	49	ELISA pretested	0.044133	0.070429	0.061314	0.037851	0.04288	0.000484	0.050383	0.044275	0.063181	0.006436	0.070716	0.090922	0.063685	INVALID	INVALID	0.045954	0.046933	0.018185	0.087304	0.075892	0.043989	0.007109	0.029589	0.080478	0.075161	0.082381	0.07358	0.072775	0.065926	0.065271	0.052621	0.086384	0.085355	0.087756	0.141737	0.130742	0.091183	0.101229	0.116163	0.096857	0.060101	0.061762	0.07017	0.042799	0.061534
C	ArrayStrip	serum	50	ELISA pretested	0.024927	0.026069	0.038699	0.02439	0.014811	0.015516	0.035063	0.05293	0.036976	0.036799	0.08719	0.072277	0.045765	0.044789	0.058789	0.041529	0.028657	0.036338	0.043069	0.02655	0.030929	0.03229	0.025278	0.029934	0.049246	0.032908	0.042081	0.032281	0.042749	0.028364	0.034665	0.044438	0.060566	0.051816	0.055925	0.048263	0.043486	0.047503	0.039402	0.058589	0.026791	0.023948	0.052234	0.040296	0.025418
C	ArrayStrip	serum	51	ELISA pretested	0.010528	0.019706	0.015436	0.003351	0.000941	0.001564	0.004222	0.015549	0.01886	0.035584	0.023761	0.004144	0.01289	-0.002404	0.00131	-0.000326	0.00419	-0.00214	0.002458	0.002642	0.00161	0.003731	0.005934	0.002193	0.00703	0.001655	0.000783	0.001686	0.003289	0.002556	0.004511	0.006943	0.048737	0.01321	0.007302	0.011188	0.010663	0.010365	0.016062	0.004704	0.006099	0.002451	0.013592	0.00545	0.003459
C	ArrayStrip	serum	52	ELISA pretested	0.016702	0.013607	0.020911	0.00904	0.007283	0.026449	0.004115	0.020318	0.02085	0.01049	0.025341	0.020718	0.013017	0.001805	0.025267	0.007325	0.038034	-0.000204	0.003833	0.015216	0.011658	0.008484	0.01985	0.004951	0.005514	0.005745	0.001896	0.012263	0.011579	0.005934	0.002385	0.019428	0.005422	0.005292	0.010729	0.012367	0.010016	0.01553	0.006711	0.014088	0.008464	0.006908	0.015786	0.010864	0.00527
C	ArrayStrip	serum	53	ELISA pretested	0.01072	0.018384	0.019453	0.013472	0.009651	0.014192	0.009214	0.022197	0.030973	0.048536	0.024338	0.005393	0.001	-0.001301	0.015822	0.001939	INVALID	-0.00206	0.002214	0.014561	0.001242	0.007967	0.003003	0.001573	0.002699	0.004223	0.006507	-0.001815	0.004557	0.0042	0.003743	0.044051	0.005534	0.007712	0.010226	0.002674	0.007608	0.002267	0.007441	0.003288	0.004892	0.006982	0.014246	0.003877	0.007692
C	ArrayStrip	serum	54	ELISA pretested	0.022704	0.030365	0.032336	0.017483	0.015489	0.009827	0.019871	0.040712	0.057919	0.035495	0.042267	0.035936	0.033073	0.039124	0.027711	0.008372	0.095167	0.015552	0.015879	0.012148	0.008759	0.006548	0.019821	0.012412	0.013045	0.013208	0.044271	0.019257	0.02747	0.015422	0.020097	0.034064	0.025401	0.02656	0.033998	0.011822	0.016098	0.019449	0.018135	0.02376	0.009754	0.012234	0.016471	0.01857	0.013321
C	ArrayStrip	serum	55	ELISA pretested	0.026583	0.029472	0.022902	0.019964	0.016333	0.018123	0.022107	0.028191	0.027698	0.033166	0.030807	0.021429	0.003887	0.026762	0.009081	0.024304	0.021749	0.019077	0.037271	0.016571	0.01645	0.008993	0.009673	0.015519	0.011259	0.016204	0.01467	0.015052	0.013216	0.014594	0.025889	0.016342	0.018516	0.016006	0.021561	0.020499	0.02979	0.001746	0.022503	0.023053	0.011977	INVALID	0.026128	0.01767	0.017628
C	ArrayStrip	serum	56	ELISA pretested	0.008655	0.004465	0.027695	0.002434	0.004259	0.011993	0.010609	0.004629	0.010142	0.026071	0.014769	0.001046	0.000211	0.001164	0.000127	0.002313	0.003538	0.002308	0.002106	0.098577	0.010114	0.005586	-0.000907	0.008065	INVALID	0.002112	0.005008	1.6e-05	0.003422	0.004767	0.003371	0.042175	0.007339	0.000492	0.004742	0.00536	0.006424	0.002606	0.006657	0.154975	0.163057	0.035758	0.076397	0.001854	0.00368
C	ArrayStrip	serum	57	ELISA pretested	0.002267	0.00662	0.001764	0.003709	0.000819	0.00085	0.000866	0.002361	0.00478	0.001723	0.002509	0.001022	0.003154	0.011079	0.006757	0.003769	0.001359	0.00171	0.000524	0.000647	0.001389	0.001816	0.00108	0.002719	0.001704	0.00206	0.002373	0.003619	0.00402	0.001066	0.008004	0.00195	0.00013	0.008892	0.003279	0.000343	0.002642	0.000932	0.003453	0.006561	0.002476	0.001702	0.001345	0.002137	-0.000728
C	ArrayStrip	serum	58	ELISA pretested	0.002543	0.001347	0.004223	0.00329	0.0108	0.008503	0.006872	0.015084	0.007623	INVALID	0.006929	0.003757	0.0121	-0.000234	0.00045	0.001785	0.010477	0.005657	0.005127	0.005595	0.00263	0.00252	0.008636	0.006297	-0.003483	0.003369	0.004102	0.004951	0.000575	-0.000341	0.000772	0.017593	0.009514	0.002184	0.000906	0.002416	0.008077	0.00576	0.033709	0.005671	0.025543	0.001483	-0.004664	0.007435	-0.001075
C	ArrayStrip	serum	59	ELISA pretested	0.002265	0.003354	0.004169	0.001212	0.012196	0.003306	0.002989	0.001321	0.00696	0.00605	0.000602	0.015793	-0.000216	0.002063	0.00092	0.001273	0.001322	0.007087	0.001809	-0.000735	0.000621	0.008349	0.002722	0.000681	-0.000301	0.004897	-0.001203	0.0041	0.009694	0.001543	-0.000532	0.001147	0.003358	0.000217	-0.001892	0.000833	0.00921	-0.000504	0.000853	0.000359	0.001267	0.000614	0.002683	0.005729	0.00221
C	ArrayStrip	serum	60	ELISA pretested	0.009876	0.009525	0.006783	0.006158	0.010457	-0.003504	0.007333	0.00912	0.013299	0.013312	0.012644	0.008832	0.004412	-0.00032	0.0087	0.000216	0.006978	0.004184	0.032697	0.002397	0.004885	0.00235	0.014844	-0.000879	0.003062	0.003478	0.022883	0.004008	0.006176	0.006039	0.009004	0.005595	0.012774	0.005749	0.002763	0.005928	0.00903	0.006807	0.012081	0.004441	0.008796	0.004922	0.007177	0.003549	0.001378
C	ArrayStrip	serum	61	ELISA pretested	0.005976	0.010954	0.007083	0.006347	0.006246	INVALID	0.000523	0.010188	0.009445	0.011079	0.006201	0.009108	0.009548	0.008468	0.023888	0.011362	0.009187	0.014581	-0.001855	0.001148	0.004377	0.008077	0.001409	-0.001903	0.001008	0.002733	0.032038	0.00506	0.005654	0.001602	0.001161	0.0054	0.003916	0.003474	0.003724	0.008801	0.011019	0.006409	0.011553	0.002867	0.024179	0.012884	0.000893	0.006315	0.001644
C	ArrayStrip	serum	62	ELISA pretested	0.019376	0.004051	0.016148	0.024302	0.00802	-0.002636	0.006276	0.010153	0.014903	0.019601	0.006304	0.002374	0.005592	0.015677	0.001982	0.002361	0.00164	0.002236	0.002712	0.000911	0.001483	0.00568	0.002201	0.027646	0.001622	0.000509	0.004449	0.020252	0.002588	0.002106	0.002458	0.030714	0.001994	0.000277	0.006069	0.002877	-0.001189	0.001255	0.001987	0.003722	INVALID	0.000655	0.001305	INVALID	0.002065
C	ArrayStrip	serum	63	ELISA pretested	0.000932	0.000483	0.003311	-0.000187	0.005498	0.001517	-3.2e-05	0.007909	0.0194	0.011472	0.008765	0.002889	0.001444	0.001989	0.004032	0.00204	0.0016	0.001081	0.003001	-0.001284	0.007476	0.009959	0.017538	0.002352	0.003662	0.000966	0.002292	0.013088	0.000866	0.002314	0.006405	0.000336	0.001625	0.001664	0.000635	0.00081	0.003316	0.000253	0.006116	0.000249	0.014244	0.000359	0.005239	INVALID	0.003085
C	ArrayStrip	serum	64	ELISA pretested	0.004527	-0.00052	0.00669	0.001719	0.034314	0.007186	0.003858	-0.002664	0.014715	0.003081	0.00373	0.002409	-0.003506	-0.000664	0.001024	0.00622	0.014406	0.015479	0.000377	0.001039	0.002696	0.00351	0.000479	0.000606	0.005388	0.002136	0.002064	-0.000558	0.007324	0.001106	0.001162	0.000573	0.001456	-0.000745	0.007468	-0.005011	-0.000853	INVALID	0.000169	0.019694	-0.000387	-0.000727	0.001233	0.002862	0.000523
C	ArrayStrip	serum	65	ELISA pretested	0.009514	0.018889	0.027246	0.006119	0.000384	-0.004212	0.014941	0.006698	0.0095	-0.002346	0.019532	0.004201	0.003943	0.012456	0.000336	0.004245	0.003713	0.057667	-0.000588	0.00488	0.000566	-0.001689	0.000534	0.002819	0.001177	0.004109	0.001433	0.000259	0.002217	0.004316	0.004489	1.6e-05	0.002602	INVALID	0.006808	0.001404	0.001738	0.007696	0.004932	0.002415	0.001907	0.010703	0.005295	0.005837	0.002561
C	ArrayStrip	serum	66	ELISA pretested	0.004444	0.002819	0.005206	0.004113	0.001771	0.009425	0.001682	0.002237	-0.001953	INVALID	0.007228	0.000322	0.012138	0.000622	0.002317	-0.000101	0.001484	0.000776	-0.000186	-0.001655	-0.0004	0.005311	0.001454	0.000995	0.002607	0.001951	0.000682	0.002242	0.000782	0.000369	0.002311	-0.000996	0.000329	0.001216	0.002255	0.003873	0.002231	0.001902	0.001929	0.000731	0.001343	0.044278	0.001159	0.00239	0.001964
C	ArrayStrip	serum	67	ELISA pretested	0.007011	0.005603	0.000728	0.002449	-0.00268	-0.002335	0.002728	0.011319	0.001253	INVALID	0.00455	0.00323	0.002182	0.000797	0.004257	0.001944	-0.003343	0.000334	0.000476	0.002181	0.000276	0.001595	0.002453	0.002375	-0.001483	0.02054	0.000313	0.003404	0.000314	-0.000779	0.004019	0.002994	0.006205	0.00148	0.004375	0.00099	0.005027	0.001233	0.002564	0.002502	0.003419	0.009117	0.010327	0.003942	0.002652
C	ArrayStrip	serum	68	ELISA pretested	0.009927	0.009418	0.007006	0.011967	0.001183	0.004536	0.00263	0.002317	0.006908	INVALID	0.007764	0.036208	0.000451	0.005817	-0.000963	0.001892	0.006626	0.004541	0.003391	8.2e-05	0.00159	0.003937	0.000445	0.003362	0.003063	0.003367	-0.000467	0.002934	-0.000864	0.001831	0.001876	0.002424	0.00558	0.000462	0.008888	0.001849	0.001433	0.001755	0.003587	0.004648	0.001671	0.003284	0.00352	0.002231	0.001523
C	ArrayStrip	serum	69	ELISA pretested	0.00198	0.001534	0.004208	-0.001672	-0.000447	0.005519	0.003861	-0.002231	0.000163	INVALID	0.013236	0.017578	0.000572	0.011278	0.002239	0.008634	0.006737	0.001775	0.000253	-0.00022	0.005248	0.011333	0.003722	0.002388	0.003897	0.002744	0.001162	0.034227	0.000287	0.005018	0.002289	0.000372	0.001686	0.00121	0.001654	0.017727	0.002718	0.012638	0.000663	0.000831	0.001029	-0.000499	0.00064	0.017436	0.002715
C	ArrayStrip	serum	70	ELISA pretested	-0.000613	0.007523	0.004546	0.006686	0.003738	0.001873	0.004815	0.00208	0.000572	INVALID	0.011557	0.00245	0.001808	0.003162	-5.2e-05	0.004713	0.000159	0.004292	0.003952	0.002573	-0.000414	0.017742	0.005386	0.003813	0.001814	0.004689	0.029594	0.003679	0.002466	-0.000321	0.00148	-0.001632	0.002139	0.000445	0.000469	0.001477	0.003802	0.001543	0.000922	-6.2e-05	0.000676	0.008718	0.001494	0.001242	0.006742
C	ArrayStrip	serum	71	ELISA pretested	0.006331	0.006486	0.010868	0.000919	0.003186	0.017918	0.001746	0.017537	0.00924	-0.012081	0.011437	0.001277	0.003031	0.007638	0.000158	0.006735	0.006782	0.003987	0.003696	0.002115	0.000457	0.002242	0.001963	0.002329	0.009181	0.002319	0.002904	0.001111	0.002362	0.0014	0.00707	0.003214	0.004712	0.003191	0.01825	0.000188	0.002289	0.000133	0.0018	0.004235	-0.000186	0.026395	INVALID	0.003754	0.000455
C	ArrayStrip	serum	72	ELISA pretested	0.002612	0.003153	0.001202	0.004786	0.002563	-5.7e-05	0.002037	0.000832	0.003539	-0.003939	-0.000383	0.00229	0.001991	0.001113	0.003754	0.005209	0.008877	0.004094	0.001625	0.002749	0.00055	0.00498	0.00327	-0.000355	0.003067	0.000235	0.002148	INVALID	0.001311	0.007112	-0.000789	-0.001515	0.002679	0.001515	0.002011	0.002655	0.063401	0.004071	0.001396	0.00127	0.00155	0.010152	0.002191	0.00054	0.002751
C	ArrayStrip	serum	74	ELISA pretested	0.009813	0.002731	0.006114	0.003673	0.001779	-0.006181	0.015256	0.00145	0.002568	0.010837	0.007367	0.007868	0.014658	0.001053	0.002142	0.01151	0.007608	0.004743	0.010825	-0.000787	0.002331	0.005862	0.001863	-0.002809	0.000101	0.003576	-0.002819	INVALID	0.227907	0.131921	0.046404	0.011891	0.008108	0.00797	0.018804	0.010835	0.015167	0.010895	0.011136	-0.001693	0.006758	0.00368	0.008988	-0.001718	0.007438
C	ArrayStrip	serum	75	ELISA pretested	0.002033	0.001606	0.004196	0.003388	0.016826	0.000749	0.001529	0.002432	0.00441	0.05004	0.004872	0.002319	0.002082	0.003797	0.002622	0.000835	0.000544	0.001713	0.000596	0.001721	-9.3e-05	0.002558	0.004169	0.001515	0.001166	0.0056	0.004287	0.00028	-0.001524	0.002829	0.001981	0.001844	0.000602	0.002326	INVALID	0.001795	-0.000371	0.00124	0.004549	0.001296	0.001221	0.002126	0.00354	0.00454	0.000566
C	ArrayStrip	serum	76	ELISA pretested	-0.000198	0.002554	0.006218	0.006594	0.003362	0.00437	0.010628	0.010271	0.011954	0.030065	0.016092	0.000857	0.001916	0.002739	0.001876	0.003089	0.002794	0.000658	9.9e-05	0.005549	0.004298	0.001587	0.002358	0.009368	-0.000923	0.002631	0.002266	-0.000427	0.005773	0.000663	0.002322	0.00054	0.001496	0.003455	0.001603	0.004393	0.004608	0.037481	0.001214	0.008723	0.000812	0.00025	0.003442	0.024641	0.003377
C	ArrayStrip	serum	77	ELISA pretested	0.007172	0.002229	0.000727	0.003066	-0.002565	0.002724	0.005118	0.000423	0.002018	0.05671	0.002588	0.013752	0.001726	0.003024	0.004728	0.001957	0.003403	0.001375	0.002268	0.002065	0.00012	0.000554	0.013266	0.002558	0.006977	0.002385	0.000652	0.002072	4e-05	0.001679	0.000767	0.008784	0.015163	0.002228	0.00014	0.003057	-0.000892	0.00544	0.005879	0.000114	0.005309	0.007067	0.0026	0.003127	0.001608
C	ArrayStrip	serum	78	ELISA pretested	0.001706	0.083679	0.005276	0.00076	-0.001927	0.064865	-0.000797	0.06819	0.002254	INVALID	0.003113	0.000413	INVALID	0.002485	-0.001244	0.01416	0.002617	0.000936	-0.000436	0.003261	0.001725	0.001887	INVALID	0.002895	0.000117	0.001951	0.00056	0.001597	0.002563	0.00485	0.003018	0.003543	0.0217	0.003772	0.000451	0.001266	0.003185	0.085225	0.02104	0.002477	0.002541	0.000603	0.000952	0.001994	0.007139
C	ArrayStrip	serum	79	ELISA pretested	0.012026	0.005148	0.002916	0.001263	-0.001308	0.009798	0.002657	0.002679	0.036001	INVALID	0.004509	0.003391	0.002978	0.011986	0.006143	0.002164	0.004727	-0.003755	0.004732	0.007886	0.003191	-0.003212	0.000724	0.006969	0.003137	0.013657	0.000572	0.003048	0.013737	0.003758	0.002076	0.004599	0.00446	0.002997	0.000724	0.00276	INVALID	0.005165	0.001132	0.004968	0.001949	0.00153	0.003355	0.012839	0.001829
C	ArrayStrip	serum	80	ELISA pretested	0.000442	0.004895	0.002065	0.000403	-0.001994	0.00381	0.005321	0.005372	0.001392	INVALID	0.004134	0.001834	0.001513	0.000766	0.004794	9e-05	-7.2e-05	0.00129	0.001537	0.051362	0.000963	-1.2e-05	-0.000435	-0.000169	0.000873	0.001269	0.001301	0.003712	0.002996	0.002939	0.001221	0.001561	0.001125	0.001659	0.002929	0.002448	0.001015	0.011616	0.000826	0.001559	0.001953	0.001227	-0.000193	0.003104	0.001127
C	ArrayStrip	serum	81	ELISA pretested	0.00253	0.004417	0.007453	0.064429	-0.004049	0.011734	0.003556	0.007162	0.006387	0.002954	0.007062	0.002819	0.004936	0.002614	0.003855	0.000271	0.019739	0.001278	0.00991	0.00148	0.000342	0.000117	0.002094	-9.5e-05	0.008262	0.001943	0.002833	0.005273	0.000958	0.002574	0.003406	-0.000155	0.00224	0.000548	0.011143	0.002466	0.001475	0.017548	0.00273	0.004425	0.009372	0.001669	0.001032	0.002174	0.009846
C	ArrayStrip	serum	82	ELISA pretested	0.008092	0.000484	0.002629	0.001559	-0.001171	0.012574	0.011168	0.007956	0.005813	0.016208	0.007512	-0.001064	0.000864	0.003144	0.003522	0.00559	0.021774	0.002672	0.001395	0.001584	-0.000578	0.000592	0.000327	0.002294	-0.001431	0.040526	0.006646	0.001283	0.001905	-0.000475	-0.000803	0.008802	0.001998	0.002099	0.001547	0.022902	0.001097	0.003395	0.001165	0.007703	0.001743	0.00135	0.003293	-0.000908	0.000623
C	ArrayStrip	serum	83	ELISA pretested	0.005147	-0.00013	-0.001591	0.002853	-0.001021	0.033586	0.005928	0.003911	0.006675	INVALID	0.009917	0.001556	0.002753	0.001123	0.002158	0.001059	0.000874	0.002575	0.000422	0.00149	0.000215	0.017876	-0.000193	0.002192	-0.003867	0.000834	0.002365	0.000489	0.031516	0.000886	-0.000142	-0.001304	-0.001897	0.00476	-1.9e-05	0.00127	0.001013	0.000132	0.000918	0.007593	0.000335	0.000206	0.00258	0.000644	0.003071
C	ArrayStrip	serum	84	ELISA pretested	1.4e-05	-0.000608	0.01934	-0.000401	0.000403	0.004694	0.001841	0.002823	0.002493	INVALID	0.012177	0.012039	0.000983	0.003156	0.001298	0.002588	0.003531	0.001446	0.00079	0.001722	0.002336	0.000766	0.001629	0.0007	0.003574	0.000867	0.000742	0.003331	0.001157	0.001028	-0.001712	0.008348	0.00324	INVALID	0.000231	0.000688	0.003042	9.4e-05	0.000522	0.001858	0.002452	0.001547	0.004843	0.00029	0.006263
C	ArrayStrip	serum	85	ELISA pretested	0.016734	0.021747	0.02705	0.030912	0.031573	0.013566	0.016238	0.022919	0.036214	INVALID	0.026159	0.007002	0.010298	0.001704	0.001004	0.017308	0.01587	0.01197	0.010784	0.003043	0.003101	0.006972	0.003075	0.013789	0.009526	0.013408	0.015318	0.01383	0.011051	0.012529	0.003653	0.023526	0.017732	0.013383	0.021503	0.018287	0.020756	0.014345	0.029645	0.016976	0.011102	0.013218	0.00995	0.012608	0.010713
C	ArrayStrip	serum	86	ELISA pretested	0.008857	0.011812	0.01214	0.000431	0.002188	0.006671	-0.000121	0.016123	0.003928	INVALID	0.016448	0.001751	0.004661	0.014369	0.006197	0.005879	0.001693	0.005471	0.004094	0.002809	0.009118	0.000967	0.001749	0.002332	0.010361	0.012534	-5.8e-05	0.000871	0.032145	0.000462	0.002072	-0.00079	0.000184	0.002056	0.001977	0.012568	0.004477	0.013522	0.003482	0.001902	0.004852	0.014734	0.005611	0.003449	0.018466
C	ArrayStrip	serum	87	ELISA pretested	0.013578	0.021626	0.014657	0.001505	0.004654	0.006542	0.001282	0.021861	0.001883	INVALID	0.005808	0.005883	0.020802	0.005325	0.007718	0.000767	0.002784	0.007906	0.000871	0.004157	0.002389	0.000683	0.000495	0.000949	0.004401	0.004666	0.007983	0.002293	0.001715	0.004001	0.018327	0.002865	0.00557	0.001388	0.004274	0.002371	0.003909	0.000272	0.010189	0.002566	0.002455	0.001819	0.001859	0.022885	0.00052
C	ArrayStrip	serum	88	ELISA pretested	0.002386	0.001728	0.003777	0.003599	0.002226	0.000252	0.002295	0.0017	0.004913	-0.003898	0.004159	0.001095	0.002036	0.001255	0.003851	0.001808	0.004537	0.001143	-0.001455	0.001994	0.001818	0.018817	-0.001029	0.000291	0.002996	0.000662	0.002098	0.001346	0.000584	0.003671	1e-05	0.004188	0.002754	0.001051	0.046706	0.000809	0.002252	0.001589	0.001307	0.000284	0.002798	INVALID	0.002666	0.000245	0.007638
C	ArrayStrip	serum	89	ELISA pretested	0.00369	0.009946	0.004067	0.000624	-0.001294	0.007284	-0.00188	0.007916	0.004926	0.000448	0.004655	0.002767	0.004137	0.001111	0.001201	0.001166	0.002187	0.001828	0.00169	-0.00018	0.002119	-0.000696	0.004278	-0.000304	0.004389	0.001489	0.001792	-0.0001	0.007411	0.002388	0.037824	0.003041	0.00624	0.006488	0.002078	0.002069	0.033664	INVALID	0.005551	0.000817	0.004645	-0.001345	0.005117	0.003708	0.003452
C	ArrayStrip	serum	90	ELISA pretested	0.015383	0.009393	0.012612	0.017753	0.01069	0.011705	0.008872	0.012846	0.007928	INVALID	0.020773	0.001461	0.001198	0.000856	0.002996	0.00573	0.051495	0.004051	0.000987	0.002774	0.004585	0.000442	0.000845	0.000284	0.004326	INVALID	0.005328	0.003984	0.001605	0.00233	0.003566	0.001014	0.002716	0.008445	0.010034	0.001817	0.005665	0.003191	0.006278	0.006222	0.004213	0.00339	0.013418	0.004964	0.001823
C	ArrayStrip	serum	107	T. gondii positive	0.005528	0.004232	0.003167	0.002003	0.003893	0.00346	0.002644	0.003135	-0.000101	INVALID	0.012163	0.001368	0.000362	0.002597	0.001729	0.001548	0.011223	0.00234	0.03775	0.002401	0.001509	0.005788	2e-05	0.001996	0.001772	0.001041	-0.000404	0.001455	0.000851	0.000529	0.001773	0.003847	0.011452	0.000466	0.089229	0.001501	0.001081	-0.001388	0.001871	0.001994	0.021605	-0.000205	2.4e-05	0.005849	0.001084
C	ArrayStrip	serum	108	T. gondii positive	0.001225	1.3e-05	0.000182	0.001437	-0.000929	0.003309	0.004402	-8.8e-05	0.001075	INVALID	0.003661	0.001866	0.001735	0.002755	0.000563	0.00306	-0.001736	0.003907	0.002904	0.002175	0.000618	0.079569	0.015803	0.000766	0.002482	0.001033	0.001412	0.001147	0.004299	0.00833	0.002502	0.011182	0.003303	0.002458	0.002564	0.002016	0.000267	0.012239	0.002374	0.001601	0.027186	0.000636	0.002119	0.003918	0.026094
C	ArrayStrip	serum	109	T. gondii positive	0.007197	0.008915	0.010995	0.009556	0.0042	0.005928	0.002064	0.021035	0.003043	INVALID	0.027926	0.001443	0.065891	0.004389	7.7e-05	0.001682	0.001039	0.000107	0.000641	0.001014	0.001096	0.003911	-4.2e-05	0.004948	0.042691	0.000296	0.001311	0.004387	0.002998	0.000262	0.001609	0.00188	0.002661	0.002274	0.023469	0.001222	0.002534	0.001212	0.002678	0.003485	0.001318	0.000629	0.000771	0.001682	0.004103
C	ArrayStrip	serum	110	T. gondii positive	-6.4e-05	0.002942	0.00535	-4.4e-05	0.002837	0.000514	INVALID	0.008877	0.000284	INVALID	0.00787	-0.000532	-0.001782	0.001273	0.001499	0.00182	0.069483	0.002336	0.001518	0.003589	0.015002	0.001238	-2e-05	0.001135	0.002671	0.000856	0.001427	0.000141	0.00045	0.001653	-0.000705	0.002536	INVALID	0.001024	-0.000739	0.033994	0.001467	0.001078	0.001823	0.004403	0.001364	0.001204	0.00206	0.001243	0.001969
C	ArrayStrip	serum	111	T. gondii positive	0.009589	0.006323	0.006653	0.000887	-0.000654	0.001728	0.004604	0.019578	0.004261	INVALID	0.006501	0.002454	0.000386	0.003177	0.005071	-0.001295	0.019975	0.00225	0.007771	0.002558	0.013545	-0.001136	0.082718	0.000743	-0.000501	0.000457	0.001933	0.001828	0.003647	0.004406	0.001668	0.001363	0.000574	0.001065	0.003135	0.003879	0.001909	-0.002105	0.023642	0.002803	0.010888	INVALID	0.001696	0.010427	0.001373
C	ArrayStrip	serum	112	T. gondii positive	0.019303	0.028265	0.0502	0.001026	-0.002221	-0.002378	0.033648	0.019978	0.019217	INVALID	0.028837	0.004393	-0.000488	0.009032	0.008221	0.006499	INVALID	0.002867	0.001826	-0.001568	0.01617	0.005075	0.004316	0.001256	0.001709	0.002852	0.003315	0.015545	0.000508	0.002467	0.009778	0.005578	0.00067	0.006004	0.005189	0.006224	0.00058	-0.003571	0.003218	0.006249	0.013425	INVALID	0.00238	0.004704	0.006146
C	ArrayStrip	serum	113	T. gondii positive	0.003351	0.010094	0.002188	-0.001895	0.001204	-0.002468	0.003692	0.001637	0.0019	-0.003019	0.001449	0.018768	0.001417	0.001458	-3.4e-05	-0.005198	0.002254	0.002512	0.003418	0.007737	0.000991	0.000135	0.000475	0.00138	0.001869	0.001939	0.001865	0.001106	0.000857	0.001604	0.002964	0.010164	0.003231	0.014874	0.006192	0.015566	0.003273	-0.005221	0.005986	0.001696	0.004064	0.046697	0.000999	0.004409	0.001526
C	ArrayStrip	buffer	buffer	buffer	5.2e-05	0.001699	0.001335	0.003043	0.000462	0.003195	-0.006754	0.008398	0.000115	0.009067	0.000873	0.005475	0.000344	0.000874	0.003243	-0.002029	0.002056	0.001119	0.002291	0.002517	0.000372	0.00036	0.004186	0.000958	0.004445	0.004437	-0.000182	0.011436	INVALID	-0.000202	0.001406	0.002234	-0.004043	0.003555	0.001346	-0.000597	0.002434	0.002677	0.000542	0.001679	0.000113	0.000571	-0.000418	0.002565	0.001226
[truncated: 118 more columns]
